# Supplementary material for: Quantitative study of the behavior of two broadcast spawners, the sea urchins Strongylocentrotus intermedius and Mesocentrotus nudus, during mass spawning events in situ
Source: PeerJ. 2021 Apr 6;9:e11058. doi: 10.7717/peerj.11058 (PMC8034357; doi:10.7717/peerj.11058)
Supplement: Supplemental Information 1 [file peerj-09-11058-s001.xlsx]

## Sheet: Content
Table S1. Parameters of spawning events in the sea urchins Strongylocentrotus intermedius and Mesocentrotus nudus.
Content
Sheet No.	Type and location of spawning												Duration of video record for analysis	Species			Date and time of spawning						Moon phases*	Time to the moon phase (days)
																	Day	Month	Year	Time
Sheet 1	Mass spawning event in S. intermedius 16 August of 2014, in Kievka Bay												from 19:00 to 22:00	S. intermedius			16	August	2014	20:05:00			New Moon	-3
Sheet 2	Mass spawning event in S. intermedius 03 August of 2015, in Kievka Bay												from 00:30 to 03:30	S. intermedius			3	August	2015	01:03:00			Full Moon	-1
Sheet 3	Mass spawning event in S. intermedius 03 August of 2015, in Kievka Bay												from 00:23 to 03:23	S. intermedius			3	August	2015	01:23:00			Full Moon	-1
Sheet 4	Mass spawning event in S. intermedius 14 September of 2015, in Kievka Bay												from 16:11 to 19:11	S. intermedius			14	September	2015	17:12:00			New Moon	3
Sheet 5	Mass spawning event in S. intermedius 16 September of 2015, in Kievka Bay												from 15:17 to 18:17	S. intermedius			16	September	2015	16:21:00			New Moon	1
Sheet 6	Mass spawning event in S. intermedius 17 May of 2016, in Alekseev Bay												from 16:20 to 19:20	S. intermedius			17	May	2016	17:21:00			Third Quarter	2
Sheet 7	Mass spawning event in S. intermedius 19 May of 2016, in Alekseev Bay												from 04:41 to 07:41	S. intermedius			19	May	2016	05:43:00			New Moon	4
Sheet 8	Mass spawning event in S. intermedius 20 May of 2016, in Alekseev Bay												from 19:00 to 00:54	S. intermedius			20	May	2016	20:31:00			New Moon	3
Sheet 9	Mass spawning event in S. intermedius 22 May of 2016, in Alekseev Bay												from 00:20 to 03:30	S. intermedius			22	May	2016	01:21:00			New Moon	1
Sheet 10	Mass spawning event in S. intermedius 01 June of 2016, in Alekseev Bay												from 21:00 to 00:30	S. intermedius			1	June	2016	01:12:00			First Quarter	2
Sheet 11	Mass spawning event in S. intermedius 02 June of 2016, in Alekseev Bay												from 16:00 to 19:00	S. intermedius			2	June	2016	17:05:00			First Quarter	3
Sheet 12	Mass spawning event in S. intermedius 14 July of 2018, in Alekseev Bay												from 08:35 to 11:35	S. intermedius			14	July	2018	09:34:00			Third Quarter	1
Sheet 13	Mass spawning event in M. nudus 13 July of 2017, in Alekseev Bay												from 20:02 to 23:02	M. nudus			13	July	2017	21:02:00			Third Quarter	0
Sheet 14	Mass spawning event in M. nudus 19 July of 2017, in Alekseev Bay												from 20:49 to 23:49,	M. nudus			19	July	2017	21:28:00			New Moon	-2
Sheet 15	Mass spawning event in M. nudus 21 July of 2017, in Alekseev Bay												from 20:44 to 00:44,	M. nudus			21	July	2017	21:44:00			New Moon	0
Sheet 16	Mass spawning event in M. nudus 11 July of 2018, in Alekseev Bay												from 19:44 to 22:46	M. nudus			11	July	2018	20:49:00			Third Quarter	-2
Sheet 17	Mass spawning event in M. nudus 11 July of 2018, in Alekseev Bay												from 20:00 to 23:00	M. nudus			11	July	2018	21:03:00			Third Quarter	-2
Sheet 18	Mass spawning event in M. nudus 13 July of 2018, in Alekseev Bay, and synchronous spawning event in S. intermedius												from 18:45 to 21:50	M. nudus			13	July	2018	20:37:00			Third Quarter	0
Sheet 19	Mass spawning event in M. nudus 13 July of 2018, in Alekseev Bay												from 19:20 to 22:20	M. nudus			13	July	2018	20:27:00			Third Quarter	0
Sheet 20	Mass spawning event in M. nudus 17 July of 2018, in Alekseev Bay												from 22:05 to 01:05	M. nudus			17	July	2018	22:54:00			New Moon	-4
Sheet 21	Mass spawning event in M. nudus 17 July 2018, in Alekseev Bay												from 18:25 to 21:25	M. nudus			17	June	2018	19:26:00			New Moon	-4
Sheet 22	Mass spawning event in M. nudus 16 August of 2018, in Alekseev Bay												from 23:00 to 02:00	M. nudus			16	August	2018	23:48:00			New Moon	-3
Sheet 23	Mass spawning event in M. nudus 16 August of 2019, in Alekseev Bay												from 14:58 to 18:19	M. nudus			21	July	2019	17:32:00			New Moon	0
Sheet 24	Mass spawning event in M. nudus 26 July of 2019, in Alekseev Bay												from 19:25 to 23:25	M. nudus			26	July	2019	21:25:00			First Quarter	-1
Sheet 25	Spawning event in S. intermedius 11 August of 2014, in Kievka Bay												from 18:00 to 21:00	S. intermedius			11	August	2014
Sheet 26	Spawning event in S. intermedius 02 August of 2015, in Kievka Bay												from 18:31 to 21:31	S. intermedius			2	August	2015
Sheet 27	Spawning event in S. intermedius 03 August of 2015, in Kievka Bay												from 16:07 to 19:07,	S. intermedius			3	August	2015
Sheet 28	Spawning event in S. intermedius 02 July of 2016, in Alekseev Bay												from 16:00 to 19:00	S. intermedius			2	July	2016
Sheet 29	Spawning event in S. intermedius 19 May of 2016, in Alekseev Bay												from 01:51 to 03:51	S. intermedius			19	May	2016
Sheet 30	Spawning event in S. intermedius 21 May of 2016, in Alekseev Bay												from 22:01 to 01:01	S. intermedius			21	May	2016
Sheet 31	Spawning event in S. intermedius 13 July of 2018, in Alekseev Bay												from 18:45 to 21:50	S. intermedius			13	July	2018
Sheet 32	Spawning event in M. nudus 16 July of 2018, in Alekseev Bay												from 21:24 to 00:24	M. nudus			16	July	2018
Sheet 33	Spawning event in two M. nudus females 17 July of 2019, in Alekseev Bay												from 17:42 to 20:42	M. nudus			17	July	2019
Sheet 34	Spawning events in single spawning S. intermedius males in Alekseev Bay													S. intermedius				July	2017-2018
Sheet 35	Spawning events in single spawning M. nudus males in Alekseev Bay													M. nudus				July	2017-2018
																							*timeanddate https://www.timeanddate.com/moon/phases/russia/vladivostok

## Sheet: Sheet 1
Sheet 1.		Parameters of mass spawning event in S. intermedius 16 August of 2014, in Kievka Bay
		Blue raws denote the beginning and the end of spawning in males, red raws denote the beginning and the end of spawning in females. The cells with figure "1" highlited by green color denote the presence of gamete clots on the aboral surface of males and females.
	Male spawning events								Step length of males, cm								Female spawning events								Step length of females, cm								Step length of nonspawners, cm									Distance from males to the center of mass of females, cm
Time, min	Male-1	Male-2	Male-5	Dynamics of male spawning				Time, min	Male-1	Male-2	Male-5	Median step length				Time, min	Female-1	Female-2	Female-3	Dynamics of female spawning				Time, min	Female-1	Female-2	Female-3	Median step length				Time, min	Nonsp-4	Nonsp-6	Nonsp-7	Nonsp-8	Nonsp-9	Median step length			Time, min	Male-1	Male-2	Male-5	Median
1	0	0	0	0				1								1	0	0	0	0				1								1									1	25.7261	31.7261	38.1147	31.7261
2	0	0	0	0				2	0.282843	0.3	0.113649	0.282843				2	0	0	0	0				2	0.207692	0.116619	0	0.116619				2	0.141421	0.1	0.1	0.1	0.1	0.1			2	25.6335	31.6335	38.0001	31.6335
3	0	0	0	0				3	0.223607	0.282843	0.284176	0.282843				3	0	0	0	0				3	0.056	0	0	0				3	0.360555	0.1	0	0	0.447214	0.230278			3	25.6467	31.6467	38.1915	31.6467
4	0	0	0	0				4	0	0.424264	0.16	0.16				4	0	0	0	0				4	0.460001	0.349857	0	0.349857				4	0	0.1	0.141421	0.2	0	0.120711			4	25.8558	31.8558	38.5497	31.8558
5	0	0	0	0				5	0.1	0.316228	0.1	0.1				5	0	0	0	0				5	0.229715	0.359724	0	0.229715				5	0.360555	0.1	0	0	0	0.05			5	26.0146	32.0146	38.3082	32.0146
6	0	0	0	0				6	0.1	0.2	0.256125	0.2				6	0	0	0	0				6	0.207692	0.116108	0	0.116108				6	0.5	0.2	0.282843	0.223607	0	0.253225			6	25.962	31.962	38.2021	31.962
7	0	0	0	0				7	0.1	0.141421	0.256125	0.141421				7	0	0	0	0				7	0.30104	0.2	0	0.2				7	0.2	0.2	0.223607	0.1	0.1	0.2			7	26.138	32.138	38.166	32.138
8	0	0	0	0				8	0.2	0.141421	0.318176	0.2				8	0	0	0	0				8	0.19551	0.179	0	0.179				8	0.360555	0.1	0.2	0.2	0.424264	0.280278			8	25.9457	31.9457	38.3	31.9457
9	0	0	0	0				9	0.1	0.316228	0.266	0.266				9	0	0	0	0				9	0.114612	0.423558	0	0.114612				9	0.1	0.1	0	0.1	0	0.1			9	25.9631	31.9631	38.4285	31.9631
10	0	0	0	0				10	0.1	0.141421	0.3	0.141421				10	0	0	0	0				10	0.207692	0.349344	0	0.207692				10	0.1	0	0.316228	0.3	0.4	0.308114			10	26.1859	32.1859	38.1247	32.1859
11	0	0	0	0				11	0.1	0.1	0.206903	0.1				11	0	0	0	0				11	0.056	0	0.1	0.056				11	0.1	0.282843	0	0.2	0.2	0.2			11	26.2497	32.2497	38.2714	32.2497
12	0	0	0	0				12	0.1	0.223607	0.146455	0.146455				12	0	0	0	0				12	0.2	0	0.728011	0.2				12	0.412311	0.316228	0	0.2	0	0.258114			12	26.0471	32.0471	38.4666	32.0471
13	0	0	0	0				13	0.1	0.282843	0.054	0.1				13	0	0	0	0				13	0.112	0.156205	0.1	0.112				13	0.223607	0.1	0	0.223607	0.1	0.161803			13	25.9829	31.9829	38.5335	31.9829
14	0	0	0	0				14	0.223607	0.2	0.226824	0.223607				14	0	0	0	0				14	0.1	0.116619	0.2	0.116619				14	0.447214	0.316228	0	0.2	0.2	0.258114			14	26.1936	32.1936	38.7591	32.1936
15	0	0	0	0				15	0.282843	0.1	0.16	0.16				15	0	0	0	0				15	0.056	0	0	0				15	0.2	0.2	0	0.223607	0.223607	0.211803			15	26.2942	32.2942	38.7765	32.2942
16	0	0	0	0				16	0.632456	0.141421	0.367925	0.367925				16	0	0	0	0				16	0.112	0	0.360555	0.112				16	0.1	0.67082	0.1	0.2	0	0.15			16	26.759	32.759	38.6351	32.759
17	0	0	0	0				17	0.282843	0.223607	1.98638	0.282843				17	0	0	0	0				17	0.224	0.305941	0.424264	0.305941				17	0.141421	0.424264	0	0.223607	0.3	0.261803			17	26.8137	32.8137	37.7498	32.8137
18	0	0	0	0				18	0.4	0.223607	1.09454	0.4				18	0	0	0	0				18	0.112	0.1	0	0.1				18	0.223607	0	0	0.424264	0	0.111803			18	27.1699	33.1699	37.237	33.1699
19	0	0	0	0				19	0	0.1	0.4	0.1				19	0	0	0	0				19	0	0.2	0	0				19	0.72111	0.223607	0	0.282843	0	0.253225			19	27.1654	33.1654	37.6121	33.1654
20	0	0	0	0				20	0.1	0.1	0.207162	0.1				20	0	0	0	0				20	0.1	0	0.2	0.1				20	0.360555	0.5	0	0.282843	0	0.321699			20	27.2883	33.2883	37.4304	33.2883
21	0	0	0	0				21	0.1	0.1	1.80081	0.1				21	0	0	0	0				21	0.112	0	0	0				21	0.316228	0.223607	0	0.1	0.1	0.161803			21	27.2412	33.2412	39.2529	33.2412
22	0	0	0	0				22	0.141421	0.1	0.480371	0.141421				22	0	0	0	0				22	0.056	0.233238	0	0.056				22	0.141421	0.316228	0	0.141421	0.1	0.141421			22	27.1214	33.1214	38.8256	33.1214
23	0	0	0	0				23	0.1	0	0.1	0.1				23	0	0	0	0				23	0.297321	0.06	0	0.06				23	0.1	0.2	0.141421	0.141421	0.1	0.141421			23	27.2456	33.2456	39.162	33.2456
24	0	0	0	0				24	0.2	0.1	0.586	0.2				24	0	0	0	0				24	0.2	0.4	0	0.2				24	0.1	0.316228	0	0.1	0.223607	0.161803			24	27.3079	33.3079	39.374	33.3079
25	0	0	0	0				25	0.1	0.1	0.16	0.1				25	0	0	0	0				25	0.531507	0.208806	0	0.208806				25	0.2	0.1	0	0.141421	0.223607	0.170711			25	27.7745	33.7745	39.4475	33.7745
26	0	0	0	0				26	0.1	0.1	0.511321	0.1				26	0	0	0	0				26	0.340635	0.1	0	0.1				26	0.282843	0.223607	0	0.1	0	0.161803			26	27.8063	33.8063	39.2766	33.8063
27	0	0	0	0				27	0.141421	0.2	0.206903	0.2				27	0	0	0	0				27	1.00326	0.06	0.141421	0.141421				27	0.1	0.1	0	0	0.1	0.1			27	27.0318	33.0318	38.9574	33.0318
28	0	0	0	0				28	0.2	0.141421	0.3	0.2				28	0	0	0	0				28	0.336	0	0	0				28	0.141421	0.2	0	0.223607	0	0.170711			28	26.9354	32.9354	39.5301	32.9354
29	0	0	0	0				29	0.141421	0.1	0.570225	0.141421				29	0	0	0	0				29	0.19551	0	0	0				29	0.1	0	0	0	0	0			29	26.9636	32.9636	39.0798	32.9636
30	0	0	0	0				30	0.1	0.1	1.36833	0.1				30	0	0	0	0				30	0.305182	0	0	0				30	0.2	0.1	0	0.2	1.5	0.2			30	26.7118	32.7118	37.8172	32.7118
31	0	0	0	0				31	0.141421	0	0.658328	0.141421				31	0	0	0	0				31	0.056	0	0.5	0.056				31	0.316228	0.2	0	0.447214	0.583095	0.381721			31	26.6607	32.6607	37.3157	32.6607
32	0	0	0	0				32	0.1	0.1	0.905161	0.1				32	0	0	0	0				32	0.150147	0	0	0				32	0.316228	0.360555	0	0.2	0.1	0.258114			32	26.7008	32.7008	37.3177	32.7008
33	0	0	0	0				33	0.223607	0.1	0.427	0.223607				33	0	0	0	0				33	0.150147	0.156205	0	0.150147				33	0.1	0.2	0	0.2	0.1	0.15			33	26.6297	32.6297	37.1244	32.6297
34	0	0	0	0				34	0.2	0.1	0.226824	0.2				34	0	0	0	0				34	0.343837	0	0	0				34	0.3	0.2	0.1	0.223607	1	0.261803			34	26.6563	32.6563	37.4826	32.6563
35	0	0	0	0				35	0.1	0.141421	0.400944	0.141421				35	0	0	0	0				35	0.1	0.259077	0	0.1				35	0.2	0	0	0.4	0.509902	0.3			35	26.6661	32.6661	37.6911	32.6661
36	0	0	0	0				36	0	0.1	0.304821	0.1				36	0	0	0	0				36	0.1	0	0.223607	0.1				36	0.316228	0.412311	0	0.447214	0.412311	0.412311			36	26.7142	32.7142	37.3696	32.7142
37	0	0	0	0				37	0.282843	0	0.226824	0.226824				37	0	0	0	0				37	0.297321	0	0.3	0.297321				37	0.3	0.316228	0	0.141421	1.2	0.308114			37	26.7807	32.7807	36.9259	32.7807
38	0	0	0	0				38	0.2	0.1	0.656726	0.2				38	0	0	0	0				38	0.056	0	0.2	0.056				38	0.1	0.2	0	0	0.2	0.15			38	26.8664	32.8664	37.5961	32.8664
39	0	0	0	0				39	0.316228	0.1	0.113177	0.113177				39	0	0	0	0				39	0.403901	0.1	0.360555	0.360555				39	0.141421	0	0	0.316228	0.538516	0.228825			39	26.465	32.465	37.5855	32.465
40	0	0	0	0				40	0.316228	0	0.471518	0.316228				40	0	0	0	0				40	0.056	0	0.447214	0.056				40	0.1	0.1	0.1	0.360555	1.52971	0.230278			40	26.5395	32.5395	37.9191	32.5395
41	0	0	0	0				41	0.447214	0	0.4	0.4				41	0	0	0	0				41	0.229225	0	0.412311	0.229225				41	0.3	0.1	0	0.2	0.360555	0.25			41	26.865	32.865	37.3798	32.865
42	0	0	0	0				42	0.632456	0.141421	0.438634	0.438634				42	0	0	0	0				42	0.056	0	0.141421	0.056				42	0.509902	0.1	0	0	0.141421	0.120711			42	27.2951	33.2951	37.6606	33.2951
43	0	0	0	0				43	0.4	0.223607	0.146455	0.223607				43	0	0	0	0				43	0.056	0	0	0				43	0.2	0.223607	0.1	0.1	0.360555	0.211803			43	27.1701	33.1701	37.7834	33.1701
44	0	0	0	0				44	0.860233	0.3	0.206903	0.3				44	0	0	0	0				44	0	0.116619	0	0				44	0.1	0.3	0.2	0.223607	0.894427	0.261803			44	27.2988	33.2988	37.9735	33.2988
45	0	0	0	0				45	1	0.141421	0.256125	0.256125				45	0	0	0	0				45	0.168	0.06	0.141421	0.141421				45	0.2	0.316228	0.2	0.360555	0.2	0.258114			45	27.8579	33.8579	37.9471	33.8579
46	0	0	0	0				46	1.61555	0.223607	0.285112	0.285112				46	0	0	0	0				46	0.1	0.059	0	0.059				46	0.223607	0.316228	0.1	0.1	0.316228	0.269917			46	27.962	33.962	37.9861	33.962
47	0	0	0	0				47	1.30384	0	0.1	0.1				47	0	0	0	0				47	0.1	0	0	0				47	0.360555	0.223607	0	0.223607	0.1	0.223607			47	28.1991	34.1991	37.8996	34.1991
48	0	0	0	0				48	1.84391	0.2	0.2	0.2				48	0	0	0	0				48	0.1	0	0.3	0.1				48	0.360555	0.3	0	0.141421	1.04403	0.330278			48	28.1221	34.1221	38.1252	34.1221
49	0	0	0	0				49	1.65529	0.2	0.226824	0.226824				49	0	0	0	0				49	0.150147	0	0	0				49	0.2	0.3	0	0.1	0.860233	0.25			49	28.451	34.451	38.4018	34.451
50	0	0	0	0				50	2.51794	0.141421	0.206903	0.206903				50	0	0	0	0				50	0.114612	0	0	0				50	0.2	0.1	0	0.1	0.538516	0.15			50	28.3374	34.3374	38.2588	34.3374
51	0	0	0	0				51	2.28254	0.1	0.285112	0.285112				51	0	0	0	0				51	0.229225	0	0.424264	0.229225				51	0.424264	0.141421	0	0.2	0.360555	0.280278			51	27.3374	33.3374	38.2144	33.3374
52	0	0	0	0				52	3.19155	0	0.107	0.107				52	0	0	0	0				52	0.114612	0	0	0				52	0.5	0.223607	0	0.1	0.1	0.161803			52	26.3371	32.3371	38.1577	32.3371
53	0	0	0	0				53	2.0663	0.141421	0.478674	0.478674				53	0	0	0	0				53	0.207692	0.116619	0.2	0.2				53	0.3	0.447214	0	0.2	0	0.25			53	25.7732	31.7732	38.3201	31.7732
54	0	0	0	0				54	3.97566	1.20416	7.99166	3.97566				54	0	0	0	0				54	0.19551	0	0.5	0.19551				54	1.36015	0.223607	0.282843	0.282843	0.781025	0.531934			54	26.9553	32.9553	37.156	32.9553
55	0	0	0	0				55	3.84321	0.360555	0.5	0.5				55	0	0	0	0				55	0.114612	0	0	0				55	0.5	0.223607	0	0.223607	0.806226	0.361803			55	24.533	30.533	36.8111	30.533
56	0	0	0	0				56	4.65296	0.316228	3.04138	3.04138				56	0	0	0	0				56	0.1	0	0.2	0.1				56	0.824621	0.141421	0	0	0.223607	0.182514			56	23.0435	29.0435	38.1537	29.0435
57	0	0	0	0				57	3.46699	0.2	1.14018	1.14018				57	0	0	0	0				57	0.056	0.179	0.2	0.179				57	0.509902	0.2	0	0.3	0	0.25			57	22.3198	28.3198	38.5278	28.3198
58	0	0	0	0				58	2.40208	0.538516	3.86345	2.40208				58	0	0	0	0				58	0.19551	0.2	0.316228	0.2				58	0.72111	0.360555	0	0.4	0.223607	0.380278			58	22.2631	28.2631	41.6552	28.2631
59	0	0	0	0				59	4.15933	0.5	2.92308	2.92308				59	0	0	0	0				59	0.168	1.80393	0.1	0.168				59	1.06301	0.1	0.1	0.223607	0.1	0.161803			59	22.3918	28.3918	44.1529	28.3918
60	0	0	0	0				60	4	0.316228	2.2233	2.2233				60	0	0	0	0				60	0.245308	1.40731	0	0.245308				60	0.509902	0.2	0	0.2	0.223607	0.211803			60	22.0497	28.0497	46.4458	28.0497
61	0	0	0	0				61	4.00125	0.921954	0.377359	0.921954				61	0	0	0	0				61	0.150147	0.820049	0.360555	0.360555				61	0.608276	0.141421	0	0.447214	0.583095	0.515154			61	21.8311	27.8311	46.5004	27.8311
62	0	0	0	0				62	5.38193	0.9	0.925092	0.925092				62	0	0	0	0				62	0.261197	0.5	1.38924	0.5				62	0.1	0.4	0.4	0.141421	0.282843	0.341421			62	21.8423	27.8423	47.1219	27.8423
63	0	0	0	0				63	3.947	0.2	2.01774	2.01774				63	0	0	0	0				63	0.19551	0.905539	0.6	0.6				63	0	0.360555	0.2	0.1	0.1	0.15			63	21.9125	27.9125	48.7944	27.9125
64	0	0	0	0				64	1.12298	0.424264	2.49581	1.12298				64	0	0	0	0				64	0.300293	0.2	0	0.2				64	0.360555	0.223607	0.316228	0.2	0.223607	0.269917			64	21.3384	27.3384	50.8129	27.3384
65	0	0	0	0				65	3.9906	0.316228	2.34128	2.34128				65	0	0	0	0				65	0.245308	1.4	0.2	0.245308				65	0.223607	0.538516	0	0.316228	0.3	0.308114			65	21.1077	27.1077	52.596	27.1077
66	1	0	0	1				66	3.47428	0.316228	1.27264	1.27264				66	0	0	0	0				66	0.1	0.1	0.412311	0.1				66	0.447214	0.141421	0.1	0.141421	0.447214	0.294317			66	21.1113	27.1113	53.6584	27.1113
67	1	0	0	1				67	3.70386	0.316228	1.2	1.2				67	0	0	0	0				67	0.056	0.632456	0	0.056				67	0.2	0.2	0	0.5	0.583095	0.35			67	20.9311	26.9311	52.4467	26.9311
68	0	0	0	0				68	5.18735	0.360555	1.67571	1.67571				68	0	0	0	0				68	0.056	1.52315	0	0.056				68	0.223607	0.2	0	0.223607	0.223607	0.223607			68	20.9093	26.9093	50.8166	26.9093
69	0	0	0	0				69	4.75079	0.6	1.1365	1.1365				69	0	0	0	0				69	0.150147	1.30384	0.5	0.5				69	0.1	0.3	0	0.360555	0.360555	0.330278			69	20.779	26.779	49.9225	26.779
70	0	0	0	0				70	4.49222	0.2	0.819436	0.819436				70	0	0	0	0				70	0.207692	1.253	0.223607	0.223607				70	0.223607	0.4	0.1	0.2	0.5	0.311803			70	20.6385	26.6385	49.1233	26.6385
71	0	0	0	0				71	0.2	0.2	0.3336	0.2				71	0	0	0	0				71	0.573062	0.316228	0.3	0.316228				71	0.1	0.360555	0	0.4	0.223607	0.292081			71	20.3898	26.3898	49.0573	26.3898
72	1	0	0	1				72	3.2	0.141421	0.749192	0.749192				72	0	0	0	0				72	0.320576	1.38924	0.1	0.320576				72	0.2	0.223607	0	0.3	0.141421	0.211803			72	20.3806	26.3806	49.5405	26.3806
73	0	0	0	0				73	1.8868	0.1	1.04599	1.04599				73	0	0	0	0				73	0.057	1.62788	0.921954	0.921954				73	0.141421	0.223607	0	0.1	0	0.120711			73	19.662	25.662	50.4511	25.662
74	0	0	0	0				74	1.78885	0.509902	0.480925	0.509902				74	0	0	0	0				74	0.150147	0.728011	0.781025	0.728011				74	0.424264	0	0.141421	0.141421	0	0.141421			74	19.3733	25.3733	50.196	25.3733
75	1	0	0	1				75	6.04649	0.6	0.207162	0.6				75	0	0	0	0				75	0.112	0.608276	1.69706	0.608276				75	0.447214	0.223607	0.1	0.141421	0.282843	0.253225			75	19.7323	25.7323	49.9965	25.7323
76	0	0	0	0				76	4.25441	0.1	0.256125	0.256125				76	0	0	0	0				76	0.229715	0.538516	1.02956	0.538516				76	0.141421	0.72111	0.538516	0.223607	1.0198	0.629813			76	19.1685	25.1685	50.086	25.1685
77	1	0	0	1				77	1.69608	0.447214	0.2	0.447214				77	0	0	0	0				77	0.225	0.282843	0.5	0.282843				77	0.141421	0.538516	0.412311	0.141421	0.316228	0.364269			77	18.3415	24.3415	50.0743	24.3415
78	0	0	0	0				78	1.95533	0.141421	0.769675	0.769675				78	0	0	0	0				78	0.635963	0.509902	0.1	0.509902				78	0.2	0.2	0.2	0.1	0	0.2			78	17.1465	23.1465	50.4496	23.1465
79	0	0	0	0				79	2.36115	0.223607	0.955196	0.955196				79	0	0	0	0				79	0.305182	0.2	0.948683	0.305182				79	0.1	0.3	0	0.141421	0.223607	0.182514			79	17.1295	23.1295	51.4265	23.1295
80	0	0	0	0				80	0.924883	1.7088	1.95305	1.7088				80	0	0	0	0				80	0.2	0	1.26491	0.2				80	0.3	0.141421	0	0.565685	0.223607	0.261803			80	15.6913	21.6913	52.8494	21.6913
81	0	0	0	0				81	1.23385	3.98497	8.02344	3.98497				81	0	0	0	0				81	1.20522	0	1.56205	1.20522				81	0.223607	0.447214	0.141421	0.424264	0.223607	0.323935			81	15.9218	21.9218	57.9564	21.9218
82	0	0	0	0				82	0.907526	2.61725	1.56205	1.56205				82	0	0	0	0				82	0.305182	0.282843	0.1	0.282843				82	0.2	0.1	0.223607	0.223607	0.4	0.223607			82	15.0217	21.0217	59.1109	21.0217
83	0	0	0	0				83	0.114612	3.13847	0.781025	0.781025				83	0	0	0	0				83	0.375	0.141421	1.28062	0.375				83	0.360555	0.5	0.2	0.360555	1.30384	0.430278			83	13.6688	19.6688	59.7439	19.6688
84	0	0	0	0				84	0.225	4.51774	0.583095	0.583095				84	0	0	0	0				84	1.05526	0	1.51327	1.05526				84	0.632456	0.223607	0	0.1	0.6	0.411803			84	13.6021	19.6021	58.9298	19.6021
85	0	0	0	0				85	0.759795	5.18941	0.761577	0.761577				85	0	0	0	0				85	1.83109	0	1.04403	1.04403				85	0.282843	0.316228	0.1	0.223607	0.860233	0.299535			85	14.4502	20.4502	57.9383	20.4502
86	0	0	0	0				86	0.301788	3.82753	1.55242	1.55242				86	0	0	0	0				86	1.74723	0	2.40832	1.74723				86	0.447214	0.1	0.223607	0.3	0.282843	0.291421			86	12.9082	18.9082	56.9776	18.9082
87	0	0	1	1				87	0.207692	3.40147	2.08806	2.08806				87	0	0	0	0				87	1.53739	0	2.50799	1.53739				87	0.5	0.806226	0.223607	0.412311	0.141421	0.456155			87	12.4952	18.4952	56.5273	18.4952
88	0	0	1	1				88	0.597469	4.5	4.13409	4.13409				88	0	0	0	0				88	1.89105	0	1.38924	1.38924				88	0.1	0.282843	0.316228	0.223607	0.223607	0.253225			88	12.2762	18.2762	54.4699	18.2762
89	0	0	1	1				89	0.305182	1.71172	1.90074	1.71172				89	0	0	0	0				89	0.1	0.223607	1.7088	0.223607				89	0.316228	0.984886	0.223607	0.1	0	0.269917			89	12.5416	18.5416	52.6875	18.5416
90	0	0	0	0				90	1.08951	3.13847	0.768937	1.08951				90	0	0	0	0				90	1.73223	0.223607	1.81108	1.73223				90	0.3	0.316228	0.2	0.316228	0	0.308114			90	14.4023	20.4023	50.9677	20.4023
91	0	0	0	0				91	0.299206	2.91548	1.41421	1.41421				91	0	0	0	0				91	2.84192	0.360555	0.583095	0.583095				91	0	0.412311	0	0.632456	0	0.206155			91	18.6109	22.6109	49.4594	22.6109
92	0	0	0	0				92	0	2.1	1.11803	1.11803				92	0	0	0	0				92	2.44131	0	1.26491	1.26491				92	0.5	0.223607	0	0.141421	0	0.182514			92	21.6048	23.6048	47.4739	23.6048
93	0	0	0	0				93	0.19637	1.8	0.860233	0.860233				93	0	0	0	0				93	1.50333	0	0.424264	0.424264				93	0.223607	0.4	0	0.360555	0	0.292081			93	23.7797	24.0097	49.1565	24.0097
94	0	0	1	1				94	1.0905	1.50333	0.424264	1.0905				94	0	0	0	0				94	1.72627	0	0.583095	0.583095				94	0	0.282843	0.141421	0.223607	0	0.182514			94	22.1473	24.1473	48.0432	24.1473
95	0	0	1	1				95	0.1	1.8	0.984886	0.984886				95	0	0	0	0				95	1.39284	0.509902	1.61555	1.39284				95	0.67082	0.1	0.1	0.360555	0	0.230278			95	21.6084	23.6084	49.1033	23.6084
96	0	0	1	1				96	0.114612	0.447214	2.12603	0.447214				96	0	0	0	0				96	4.15933	0.141421	1.34536	1.34536				96	0.223607	0.640312	0.360555	0.2	0	0.292081			96	22.0421	22.0421	51.5752	22.0421
97	0	0	1	1				97	0.564	4.10122	1.78045	1.78045				97	0	0	0	0				97	4.13038	0	1.76918	1.76918				97	0.5	0.2	0.806226	0.360555	0.1	0.430278			97	18.8924	22.8924	54.399	22.8924
98	0	0	1	1				98	0.958	1.74642	1.89737	1.74642				98	1	0	0	1				98	3.91152	0.141421	6.80147	3.91152				98	1.16619	0.583095	0.316228	0.223607	0.707107	0.645101			98	15.4398	21.4398	55.986	21.4398
99	0	1	1	2				99	0.677	4.45533	3.3541	3.3541				99	1	0	0	1				99	5.14826	0	5.45619	5.14826				99	1.3	0.282843	1.0198	0.360555	1.94165	1.1599			99	11.037	17.037	57.3282	17.037
100	0	1	1	2				100	0.451	3.13209	3.60555	3.13209				100	1	0	0	1				100	4.34703	2.60768	0.948683	2.60768				100	0	0.316228	1	1.90263	2.15407	1.45131			100	7.9992	16.2344	57.9499	16.2344
101	1	0	1	2				101	1.07665	0.921954	3.04138	1.07665				101	1	0	0	1				101	1.66733	3.66879	1	1.66733				101	0.8	1.23693	0.538516	1.6	0	1.01847			101	7.23436	16.9417	58.5953	16.9417
102	1	1	1	3				102	1.2064	2.5	0.8	1.2064				102	1	0	0	1				102	2.69002	2.23607	0.412311	2.23607				102	1.34164	0.509902	1.58114	0.860233	0.824621	1.10094			102	7.94175	16.6866	56.3086	16.6866
103	1	1	1	3				103	2.76847	0.905539	1.90263	1.90263				103	1	0	0	1				103	6.94957	3.17648	0.7	3.17648				103	1.23693	0.2	0.141421	0.1	0.141421	0.170711			103	7.68658	14.8011	52.2723	14.8011
104	1	1	0	2				104	2.28652	3.89487	3.53553	3.53553				104	1	0	0	1				104	1.7088	2.26716	2.626	2.26716				104	0.608276	0.223607	0.2	0.316228	0.8	0.462252			104	5.80108	14.1943	49.4791	14.1943
105	1	0	1	2				105	0.517749	4.34166	3.31361	3.31361				105	1	0	0	1				105	0.5	5.02494	2.13518	2.13518				105	0.728011	0.223607	0.3	0.223607	0.608276	0.454138			105	5.1943	13.81	46.6299	13.81
106	1	0	1	2				106	1.67523	5.02195	3.35261	3.35261				106	1	0	0	1				106	2.31948	4.70106	2.95825	2.95825				106	0.8544	0.412311	0.67082	0.316228	0.2	0.541565			106	4.80995	14.6489	43.6212	14.6489
107	1	0	1	2				107	0.640312	2.84253	0.360555	0.640312				107	1	0	0	1				107	1.81108	1.74642	7.68384	1.81108				107	0.2	0.2	0.3	0.5	0.3	0.3			107	5.64893	14.621	43.6744	14.621
108	1	0	1	2				108	1.98665	1.48661	2.30217	1.98665				108	1	0	0	1				108	1.16619	1.62788	2.08342	1.62788				108	0.316228	0.223607	0.3	0.1	0.2	0.261803			108	5.62104	13.5836	44.8658	13.5836
109	1	0	0	1				109	0.702317	4.73814	4.07922	4.07922				109	1	0	0	1				109	1.20416	5.31601	0.674222	1.20416				109	0.5	0.316228	0.4	0.141421	0.3	0.358114			109	4.58363	13.6334	50.0159	13.6334
110	0	0	1	1				110	1.10142	1.72627	1.70294	1.70294				110	1	0	0	1				110	1.86815	1.02956	0.427552	1.02956				110	0.2	0.316228	0.3	0.316228	0.1	0.308114			110	4.63339	14.2783	51.0367	14.2783
111	1	0	1	2				111	0.754668	0.728011	2.66271	0.754668				111	1	0	0	1				111	1.3	1.0198	0.495186	1.0198				111	0.360555	0.2	0.7	0	0.412311	0.386433			111	5.27831	14.2005	49.5644	14.2005
112	0	0	1	1				112	0.927699	0.412311	4.81664	0.927699				112	1	0	0	1				112	2.0025	1.08167	0.990372	1.08167				112	0.2	0.2	1.02956	0.1	0.4	0.3			112	5.20054	14.0486	44.8622	14.0486
113	1	0	1	2				113	0.299206	1.14018	3.8833	1.14018				113	1	0	1	2				113	0.894427	2.06155	0.537386	0.894427				113	0.316228	0.1	0.447214	0.223607	0.360555	0.338391			113	5.04858	13.5045	41.7385	13.5045
114	1	0	0	1				114	1.26871	2.65707	4.02616	2.65707				114	1	0	1	2				114	1	1.58114	1.11032	1.11032				114	0.282843	0.3	0.632456	0.5	0.141421	0.4			114	4.50449	13.5027	37.0444	13.5027
115	0	0	1	1				115	0.412311	1.8868	3.64005	1.8868				115	1	0	0	1				115	0.141421	2.5318	0.1	0.141421				115	0.1	0.316228	0.2	0.223607	0	0.211803			115	4.50266	13.3247	35.02	13.3247
116	0	0	1	1				116	1.11803	1.26491	2.38537	1.26491				116	1	0	0	1				116	1.0198	5.60446	0.247136	1.0198				116	0.360555	0.538516	0	0.316228	0.141421	0.338391			116	4.32472	14.7039	33.6152	14.7039
117	0	0	0	0				117	0.806226	1.36015	7.07248	1.36015				117	1	0	0	1				117	2.92062	3.2573	0.076	2.92062				117	0.282843	2.28254	0.761577	1.72047	0	1.24102			117	5.70392	14.1486	41.2956	14.1486
118	0	0	0	0				118	0.412311	0.989949	1.74642	0.989949				118	1	0	0	1				118	0.509902	1.84391	0.407156	0.509902				118	0.1	0.5	0.360555	0.509902	0.223607	0.430278			118	5.14857	14.2259	40.2401	14.2259
119	0	0	0	0				119	0.538516	1.98494	4.58803	1.98494				119	1	1	0	2				119	1.08167	1.62788	1.03481	1.08167				119	0.223607	0.412311	0.282843	0.538516	0.223607	0.347577			119	5.22595	13.8466	37.4636	13.8466
120	0	0	0	0				120	0.1	2.0025	2.33452	2.0025				120	1	1	0	2				120	1.98494	4.78539	0.427552	1.98494				120	0.424264	0.3	1.0198	0.8544	0.2	0.639332			120	4.84663	13.5882	35.0273	13.5882
121	1	0	0	1				121	0.447214	3.64005	4.75395	3.64005				121	1	1	0	2				121	1.56205	1.72047	1.41775	1.56205				121	0.223607	0.223607	0.141421	0.2	0	0.211803			121	4.58816	14.8625	29.6153	14.8625
122	1	0	0	1				122	0.948683	3.64966	2.64197	2.64197				122	0	0	0	0				122	2.96985	0.5	0.522304	0.522304				122	0.4	1.21655	0.223607	0.412311	0.1	0.406155			122	5.86249	14.6753	27.6542	14.6753
123	1	0	0	1				123	0.4	2.18403	7.29178	2.18403				123	0	0	0	0				123	1.26491	1.78045	0.309233	1.26491				123	0.5	0.9	0.6	0.509902	0.141421	0.554951			123	5.67528	14.581	34.7504	14.581
124	0	0	0	0				124	0	1.52971	2.2	1.52971				124	0	0	0	0				124	0.6	0.424264	0	0.424264				124	0.1	0.447214	0	0.1	0	0.1			124	5.581	13.8586	32.884	13.8586
125	0	0	0	0				125	0	1	1	1				125	0	0	0	0				125	1.11803	1.52643	0	1.11803				125	0.761577	0.282843	0.412311	0.3	0	0.356155			125	4.85864	14.098	33.3091	14.098
126	0	0	0	0				126	0	1.0198	0.761577	0.761577				126	0	0	0	0				126	0.412311	0.223607	0.505594	0.412311				126	0.360555	0.141421	0.282843	0.583095	0	0.321699			126	5.09796	14.0156	33.0622	14.0156
127	0	0	0	0				127	0	0.707107	1.26491	0.707107				127	0	0	0	0				127	0.3	0.7	0.6744	0.6744				127	0.1	0	0.5	0.412311	0	0.256155			127	5.01561	13.9256	34.1685	13.9256
128	0	0	0	0				128	0	0.412311	5.78705	0.412311				128	0	0	0	0				128	0.223607	0.424264	0.1	0.223607				128	0.141421	0.2	0.67082	0.282843	0	0.241421			128	4.92561	13.2558	39.9767	13.2558
129	0	0	0	0				129	0.538516	0.7	4.17612	0.7				129	0	0	0	0				129	0.806226	5.45894	0.4	0.806226				129	0	0.3	0.5	0.3	0	0.3			129	4.25579	12.9422	44.6525	12.9422
130	0	0	0	0				130	0.316228	1	3.84838	1				130	0	0	0	0				130	0.3	4.47772	0.309233	0.309233				130	0.141421	0.707107	0.223607	0.1	0	0.182514			130	3.94219	14.0225	48.3106	14.0225
131	0	0	0	0				131	1.65312	0.9	2.78568	1.65312				131	0	0	0	0				131	0.608276	0.921954	0.674692	0.674692				131	0.360555	1.94165	0.1	0.223607	0.1	0.292081			131	5.02246	14.6253	51.1224	14.6253
132	0	0	0	0				132	0.545952	0.5	1.45602	0.545952				132	0	0	0	0				132	0.223607	0	1.4	0.223607				132	0.141421	4.45982	0.632456	0.223607	0	0.428031			132	5.62533	15.8132	51.085	15.8132
133	0	0	0	0				133	1.41089	0.316228	3.32415	1.41089				133	0	0	0	0				133	0.2	0.141421	0.90312	0.2				133	0.360555	1.97231	0.4	0.316228	0.1	0.380278			133	6.81322	15.8642	53.1409	15.8642
134	0	0	0	0				134	0.056	0.728011	4.29535	0.728011				134	0	0	0	0				134	0.141421	0.4	0.505594	0.4				134	0.1	0.6	0	0.608276	0	0.35			134	6.86424	15.8304	54.7311	15.8304
135	0	0	0	0				135	0	0.538516	2.64764	0.538516				135	0	0	0	0				135	0.1	0.2	0.075	0.1				135	1.11803	0.360555	0.141421	0.360555	0.412311	0.386433			135	6.83037	15.8379	54.2627	15.8379
136	0	0	0	0				136	0	3.10644	1.30384	1.30384				136	0	0	0	0				136	0.1	0.1	0.362221	0.1				136	1.26491	0.921954	0.223607	0.3	0.223607	0.610977			136	6.83789	15.884	53.1718	15.884
137	0	0	0	0				137	0	1.20416	2.28473	1.20416				137	0	0	0	0				137	0.1	0.3	0	0.1				137	0.1	0.223607	0.3	0	0.1	0.161803			137	6.88403	15.9297	55.196	15.9297
138	0	0	0	0				138	0	2.64008	0.8	0.8				138	0	0	0	0				138	0.141421	0.509902	0.2	0.2				138	0.4	0.1	0.1	0.781025	0	0.25			138	6.92974	16.0793	55.953	16.0793
139	0	0	0	0				139	0	5.85235	0.3	0.3				139	0	0	0	0				139	0.3	0.6	0	0.3				139	0.2	0.2	0.1	0.640312	0.282843	0.241421			139	7.07933	16.0961	55.7752	16.0961
140	0	0	0	0				140	0.169	0	0.632456	0.169				140	0	0	0	0				140	0	0.806226	1.04931	0.806226				140	0.223607	0.1	0.1	0.223607	0.1	0.161803			140	7.0961	15.5885	54.9989	15.5885
141	0	0	0	0				141	0.247136	0.509902	0	0.247136				141	0	0	0	0				141	0.5	0.1	0.247136	0.247136				141	0.141421	0.5	0.2	0.1	0.1	0.170711			141	6.5885	16.0643	55.332	16.0643
142	0	0	0	0				142	0.225	0.824621	0.72111	0.72111				142	0	0	0	0				142	0.943398	0.3	0	0.3				142	0	0.316228	0.632456	0.141421	0.316228	0.316228			142	7.06434	15.8474	55.257	15.8474
143	0	0	0	0				143	0.299206	2.30217	0.6	0.6				143	0	0	0	0				143	0.223607	0.1	0.075	0.1				143	0.1	0.632456	0.1	0.282843	0.2	0.241421			143	6.84744	15.6187	55.765	15.6187
144	0	0	0	0				144	0	1.86011	0.4	0.4				144	0	0	0	0				144	0.316228	0.2	0	0.2				144	0.223607	0.632456	0	0.316228	1.06301	0.474342			144	6.61868	15.6652	56.4466	15.6652
145	0	0	0	0				145	0	2.03961	0.2	0.2				145	0	0	0	0				145	0.223607	0.2	0	0.2				145	0.3	1.72047	0	0.412311	0.360555	0.386433			145	6.66524	15.4603	56.6282	15.4603
146	0	0	0	0				146	0.19637	1.04403	0.707107	0.707107				146	0	0	0	0				146	0.3	0.3	0	0.3				146	0.2	1.52643	0.223607	0.1	0.2	0.211803			146	6.4603	15.5718	57.3481	15.5718
147	0	0	0	0				147	0	0.141421	0.2	0.141421				147	0	0	0	0				147	0.223607	0.2	0	0.2				147	0.1	0.806226	0.1	0.1	0	0.1			147	6.57183	15.4566	57.4654	15.4566
148	0	0	0	0				148	0	0.3	0.6	0.3				148	0	0	0	0				148	0.223607	0	0	0				148	0.141421	1.40357	0.223607	0.412311	0.1	0.317959			148	6.4566	15.5316	58.1474	15.5316
149	0	0	0	0				149	0	0	0.3	0				149	0	0	0	0				149	0.2	0.2	0	0.2				149	0.1	0.223607	0	0.412311	0.141421	0.182514			149	6.53156	15.6674	58.4048	15.6674
150	0	0	0	0				150	0.30104	0.282843	0.3	0.3				150	0	0	0	0				150	0.223607	0.316228	0	0.223607				150	0.412311	0.608276	0	0.282843	0.447214	0.429762			150	6.6674	16.3489	58.6846	16.3489
151	0	0	0	0				151	0.740492	0.3	0.2	0.3				151	0	0	0	0				151	0.1	0.141421	0	0.1				151	0.1	0.223607	0	0.538516	0	0.161803			151	7.34886	16.3518	58.7394	16.3518
152	0	0	0	0				152	0	0.141421	0.1	0.1				152	0	0	0	0				152	0	0.141421	0	0				152	0.1	0.360555	0	0.141421	0.1	0.120711			152	7.35176	16.3292	58.8256	16.3292
153	0	0	0	0				153	0.2	0	0.3	0.2				153	0	0	0	0				153	0.1	0.223607	0	0.1				153	0.3	0.1	0	0.223607	0	0.161803			153	7.32917	16.3295	58.5188	16.3295
154	0	0	0	0				154	0	0	0.223607	0				154	0	0	0	0				154	0.1	0	0	0				154	0.3	0.4	0	0.1	0	0.2			154	7.32945	16.292	58.6077	16.292
155	0	0	0	0				155	0	0	0.412311	0				155	0	0	0	0				155	0	0.316228	0	0				155	0.1	0.223607	0	0.1	0	0.1			155	7.29198	16.3266	58.2462	16.3266
156	0	0	0	0				156	0	0.8544	0.6	0.6				156	0	0	0	0				156	0.3	0.141421	0	0.141421				156	0.2	0.3	0.1	0.360555	0.223607	0.261803			156	7.32662	16.4293	58.8444	16.4293
157	0	0	0	0				157	0	0.3	0.5	0.3				157	0	0	0	0				157	0.141421	0.1	0	0.1				157	0.141421	0.5	0.1	0.6	0.2	0.35			157	7.42934	16.4593	59.2542	16.4593
158	0	0	0	0				158	0	0	0.2	0				158	0	0	0	0				158	0.141421	0.1	0	0.1				158	0.223607	0.4	0.1	0.2	0	0.211803			158	7.45929	16.5445	59.4058	16.5445
159	0	0	0	0				159	0	0	0.5	0				159	0	0	0	0				159	0.1	0.424264	0	0.1				159	0.707107	0.583095	0.1	1.00499	0.2	0.645101			159	7.54451	16.4494	59.7949	16.4494
160	0	0	0	0				160	0	0	0.4	0				160	0	0	0	0				160	0.141421	0.2	0	0.141421				160	0.2	0.223607	0	0.424264	0.412311	0.317959			160	7.44936	16.0287	60.2862	16.0287
161	0	0	0	0				161	0.395	0.640312	0.4	0.4				161	0	0	0	0				161	0.1	0.1	0	0.1				161	0.2	0.583095	0	0.223607	0	0.211803			161	7.02867	15.876	60.767	15.876
162	0	0	0	0				162	0.112	0	0.4	0.112				162	0	0	0	0				162	0.141421	0.360555	0	0.141421				162	0.1	0.223607	0.1	0.4	0.1	0.161803			162	6.87597	15.9217	61.2466	15.9217
163	0	0	0	0				163	0	0	0.4	0				163	0	0	0	0				163	0.2	0.1	0	0.1				163	0.141421	0.316228	0	0.1	0.2	0.170711			163	6.92167	15.9039	61.6391	15.9039
164	0	0	0	0				164	0	0	0.6	0				164	0	0	0	0				164	0.2	0.316228	0	0.2				164	0.2	0.223607	0	0.1	0.1	0.15			164	6.90391	15.9517	62.2294	15.9517
165	0	0	0	0				165	0	0	0	0				165	0	0	0	0				165	0.2	0.223607	0	0.2				165	0.2	0.3	0	0.1	0.1	0.15			165	6.95172	15.8037	62.2084	15.8037
166	0	0	0	0				166	0	0	0.2	0				166	0	0	0	0				166	0.141421	0.1	0	0.1				166	0.1	0.141421	0	0.1	0	0.1			166	6.8037	15.8364	62.5587	15.8364
167	0	0	0	0				167	0	0	0.583095	0				167	0	0	0	0				167	0	0.223607	0	0				167	0.1	0.223607	0	0.2	0.1	0.15			167	6.83644	15.8681	63.0121	15.8681
168	0	0	0	0				168	0	0	0.2	0				168	0	0	0	0				168	0.3	0.223607	0	0.223607				168	0.223607	0.141421	0	0.141421	0	0.141421			168	6.86814	15.8772	63.2088	15.8772
169	0	0	0	0				169	0	4.11096	0	0				169	0	0	0	0				169	0	0.5	0	0				169	0.509902	0.5	0	0.141421	0.223607	0.361803			169	6.87716	16.0996	63.2135	16.0996
170	0	0	0	0				170	0	0.948683	0	0				170	0	0	0	0				170	0.316228	0.141421	0	0.141421				170	0.424264	1.2	0	1.02956	0.223607	0.726914			170	7.09957	16.0283	62.9378	16.0283
171	0	0	0	0				171	0	0.412311	0	0				171	0	0	0	0				171	0.2	0.2	0	0.2				171	0.3	0.6	0	0.4	0.141421	0.35			171	7.02826	15.9452	62.981	15.9452
172	0	0	0	0				172	0	0	0.2	0				172	0	0	0	0				172	0.223607	0.2	0	0.2				172	0.2	0.223607	0.2	0	0.223607	0.211803			172	6.94518	15.8501	63.2607	15.8501
173	0	0	0	0				173	0	0	0	0				173	0	0	0	0				173	0.141421	0	0	0				173	0.1	0.2	0	0.2	0.2	0.2			173	6.85014	15.9143	63.3527	15.9143
174	0	0	0	0				174	0	0	0	0				174	0	0	0	0				174	0.223607	0.1	0	0.1				174	0.223607	0.1	0	0.2	0.1	0.15			174	6.91431	15.9033	63.3084	15.9033
175	0	0	0	0				175	0	0	0	0				175	0	0	0	0				175	0.1	0.1	0	0.1				175	0.2	0.2	0	0.2	0	0.2			175	6.90328	15.8499	63.3073	15.8499
176	0	0	0	0				176	0	0	0	0				176	0	0	0	0				176	0.223607	0	0	0				176	0.223607	0.4	0	0.1	0	0.161803			176	6.84987	15.8484	63.346	15.8484
177	0	0	0	0				177	0	0	0	0				177	0	0	0	0				177	0.1	0.141421	0	0.1				177	0	0.2	0	0.2	0	0.1			177	6.84837	15.8735	63.3392	15.8735
178	0	0	0	0				178	0.207964	0	0	0				178	0	0	0	0				178	0.4	0.2	0	0.2				178	0.1	0.2	0	0.141421	0.3	0.170711			178	6.87347	16.8356	63.3369	16.8356
179	0	0	0	0				179								179	0	0	0	0				179								179			0	0.538516	0.707107	0.622812			179	7.83563	14.8356	63.2359	14.8356
180								180								180								180								180									180
[truncated: 7 more columns]

## Sheet: Sheet 2
Sheet 2.	Parameters of mass spawning event in S. intermedius 03 August of 2015, in Kievka Bay
	Blue raws denote the beginning and the end of spawning in males. The cells with figure "1" highlited by green color denote the presence of gamete clots on the aboral surface of males and females.
	Male spawning events															Step length of males, cm														Step length of nonspawners, cm
Time, min	Male-1	Male-2	Male-3	Male-4	Male-5	Male-6	Male-7	Male-8	Male 9	Male-10	Dynamics of male spawning				Time, min	Male-1	Male-2	Male-3	Male-4	Male-5	Male-6	Male-7	Male-8	Male9	Male-10	Median step length			Time, min	Nonsp-3	Nonsp-4	Nonsp-5	Median step length
1	0	0	0	0	0	0	0	0	0	0	0				1									0.131894					1
2	0	0	0	0	0	0	0	0	0	0	0				2	0.141421	0.2	0.218257	0	0	0	0.316228	0.5	0	0.1	0.120711			2	0.447214	0	0.984886	0.447214
3	0	0	0	0	0	0	0	0	0	0	0				3	0.1	0	0.116	0.447214	0	0	0.3	0.3	0	0	0.05			3	0.223607	0	1.30384	0.223607
4	0	0	0	0	0	0	0	0	0	0	0				4	0.141421	0.141421	0	0.282843	0	0	0.141421	0.360555	0.1	0.1	0.120711			4	0.316228	0.3	0.392839	0.316228
5	0	0	0	0	0	0	0	0	0	0	0				5	0.223607	0.1	0	0.412311	0	0.1	0	0	0	0.1	0.05			5	0.1	0	1.52971	0.1
6	0	0	0	0	0	0	0	0	0	0	0				6	0.1	0.72111	0	0	0	0	0.2	0.1	0	0.2	0.05			6	1.88056	0	0.35372	0.35372
7	0	0	0	0	0	0	0	0	0	0	0				7	0.316228	0.412311	0	0	0	0	0.223607	0	0	0	0			7	1.12066	0	1.62788	1.12066
8	0	0	0	0	0	0	0	0	0	0	0				8	0.141421	0.3	0	0.282843	0.360555	0	0	0	0.217706	0	0.0707107			8	0.360555	0.806226	2.13776	0.806226
9	0	0	0	0	0	0	0	0	0	0	0				9	0.141421	0	0	0.1	0	0	0.316228	0	0.2	0.1	0.05			9	0.412311	0.282843	0.583095	0.412311
10	0	0	0	0	0	0	0	0	0	0	0				10	0.1	0.141421	0	0.1	0	0.141421	0.141421	0	0.1	0	0.1			10	0	0	0.921954	0
11	0	0	0	0	0	0	0	0	0	0	0				11	0.141421	0	0	0	0	0	0.1	0	0.1	0	0			11	0	0	0.223607	0
12	0	0	0	0	0	0	0	0	0	0	0				12	0	0.141421	0	0	0	0	0.2	0	0	0	0			12	0	0	1.96469	0
13	0	0	0	0	0	0	0	0	0	0	0				13	0.1	0	0	0.223607	0	0	0.141421	0	0	0.1	0			13	0.4	0	0.848528	0.4
14	0	0	0	0	0	0	0	0	0	0	0				14	0.360555	0.1	0	0	0	0.2	0.565685	0	0	0	0			14	0	0	1.92354	0
15	0	0	0	0	0	0	0	0	0	0	0				15	0.141421	0.1	0	0	0	0	0.360555	0	0	0	0			15	0.1	0	1.4	0.1
16	0	0	0	0	0	0	0	0	0	0	0				16	0.2	0	0	0	0	0	0.223607	0.316228	0	0	0			16	0.509902	0	1.84391	0.509902
17	0	0	0	0	0	0	0	0	0	0	0				17	0.1	0.141421	0	0	0	0.1	0.3	0	0	0	0			17	0	0	1.43178	0
18	0	0	0	0	0	0	0	0	0	0	0				18	0	0	0	0	0	0	0.316228	0	0	0	0			18	0	0	1.34164	0
19	0	0	0	0	0	0	0	0	0	0	0				19	0.1	0.223607	0	0	0	0	0.1	0.1	0	0	0			19	0.316228	0	1.94165	0.316228
20	0	0	0	0	0	0	0	0	0	0	0				20	0	0.1	0	0	0	0	0.316228	0.3	0	0	0			20	0.2	2.00998	0.67082	0.67082
21	0	0	0	0	0	0	0	0	0	0	0				21	0	0.1	0	0	0	0	0.424264	0.223607	0	0	0			21	0	3.11127	0.608276	0.608276
22	0	0	0	0	0	0	0	0	0	0	0				22	0.141421	0.1	0	0	0	0.1	0.1	0	0	0	0			22	0.223607	1.02956	0.5	0.5
23	0	0	0	0	0	0	0	0	0	0	0				23	0.1	0	0	0	0	0	0.223607	0	0	0	0			23	0	1.7	0.761577	0.761577
24	0	0	0	0	0	0	0	0	0	0	0				24	0.1	0.2	0	0	0	0	0.412311	0	0	0	0			24	0	1.02956	0	0
25	0	0	0	0	0	0	0	0	0	0	0				25	0.141421	0.1	0	0	0	0.2	0.141421	0	0	0	0			25	0.316228	2.19317	0	0.316228
26	0	0	0	0	0	0	0	0	0	0	0				26	0	0.2	0	0	0	0.728011	0.316228	0	0	0	0			26	0	0.728011	0.761577	0.728011
27	0	0	0	0	0	0	0	0	0	0	0				27	0.141421	0.1	0	0	0	0.5	0.424264	0	4.63609	0	0.05			27	0	0.806226	0.424264	0.424264
28	0	0	0	0	0	0	0	0	0	0	0				28	0.1	0.1	0.252634	0	0	0.141421	0.509902	0	11.3633	0	0.1			28	0.223607	5.13442	0.1	0.223607
29	0	0	0	0	0	0	0	0	0	0	0				29	0.2	0	0	0	0	0.1	0.316228	0	9.53362	0	0			29	0.1	1.34536	0.141421	0.141421
30	0	0	0	0	0	0	0	0	0	0	0				30	0.1	0	0	0	0	0.223607	0.223607	0	4.56508	0	0			30	0.282843	1.52643	0.412311	0.412311
31	0	0	0	0	0	0	0	0	0	0	0				31	0.2	0	0	0	0.1	0.1	0.360555	0	1.26491	0.1	0.1			31	0.1	1.16619	0.282843	0.282843
32	0	0	0	0	0	0	0	0	0	0	0				32	0.1	0.5	0	0	0	0.1	0.3	0	2.88444	0	0.05			32	0.316228	0.223607	0.905539	0.316228
33	0	0	0	0	0	0	0	0	0	0	0				33	0	0.223607	0	0	0	0.141421	0.316228	0	1.67631	0	0			33	0	1.48661	0.2	0.2
34	0	0	0	0	0	0	0	0	0	0	0				34	0.141421	0.141421	0	0	0.1	0.2	0.360555	0	3.32415	0	0.120711			34	0.360555	1.02956	0.728011	0.728011
35	0	0	0	0	0	0	0	0	0	0	0				35	0.3	0.141421	0	0	0	0.223607	0.223607	0.2	3.89102	0	0.170711			35	0.141421	1.52643	0.223607	0.223607
36	0	0	0	0	0	0	0	0	0	0	0				36	0.1	0.1	0	0	0	0	0.8544	0	8.98721	0.1	0.05			36	0	1.253	0.3	0.3
37	0	0	0	0	0	0	0	0	0	0	0				37	0	0	0	0	0	0	1.08167	0	2.81603	0	0			37	0	1.06301	0.3	0.3
38	0	0	0	0	0	0	0	0	0	0	0				38	0.1	0	0	0	0	0.1	0.8	0	3.55106	0	0			38	0.1	0.781025	0.412311	0.412311
39	0	0	0	0	0	0	0	0	0	0	0				39	0	0	0	0	0	0.1	0.6	0	0.8544	0.223607	0			39	0	0.316228	0.67082	0.316228
40	0	0	0	0	0	0	0	0	0	0	0				40	0	0	0	0	0	0.316228	0.447214	0	4.90102	0	0			40	0.316228	1.48661	0.424264	0.424264
41	0	0	0	0	0	0	0	0	0	0	0				41	0	0	0	0	0	0.223607	0.632456	0	4.30465	0	0			41	0	0.6	2.12603	0.6
42	0	0	0	0	0	0	0	0	0	0	0				42	0	0	0	0	0	0.2	0.4	0	1.74929	0	0			42	0.2	0.282843	1.02956	0.282843
43	0	0	0	0	0	0	0	0	0	0	0				43	0	0	0	0	0	0.223607	0.509902	0.2	0.412311	0.223607	0.1			43	0.1	0.282843	1.30384	0.282843
44	0	0	0	0	0	0	0	0	0	0	0				44	0	0	0	0	0	0.141421	0.282843	0	1.48661	0.141421	0			44	0.223607	1.33417	0.2	0.223607
45	0	0	0	0	0	0	0	0	0	0	0				45	0	0	0	0	0	0.2	0.2	0.3	0.360555	0.1	0.05			45	0.412311	1.02956	0.2	0.412311
46	0	0	0	0	0	0	0	0	0	0	0				46	0	0.509902	0.271	0	0	0.223607	0.316228	0.2	0.2	0.1	0.2			46	0	0.72111	0.3	0.3
47	0	0	0	0	0	0	0	0	0	0	0				47	0.1	0.1	0	0	0	0.2	0.141421	0.316228	0.8544	0	0.1			47	0	0.282843	0.5	0.282843
48	0	0	0	0	0	0	0	0	0	0	0				48	0.2	0	0	0	0	0.1	0.1	0.141421	0.640312	0	0.05			48	0	0.360555	0.5	0.360555
49	0	0	0	0	0	0	0	0	0	0	0				49	0	0.223607	0	0	0	0.223607	0.3	1.23693	0.921954	0	0.111803			49	0.2	1.22066	0.3	0.3
50	0	0	0	0	0	0	0	0	0	0	0				50	0	0.223607	0.214672	0	0	0.360555	0.223607	0	0.2	0	0.1			50	0.583095	1.87883	0.509902	0.583095
51	0	0	0	0	0	0	0	0	0	0	0				51	0.1	0.1	0.426	0	0.1	0.223607	0.316228	0.316228	1.96977	0.141421	0.182514			51	0	1.17047	0.141421	0.141421
52	0	0	0	0	0	0	0	0	0	0	0				52	0	0	0.2898	0	0.223607	0.223607	0.824621	0.141421	0.2	0.1	0.170711			52	0.141421	0.223607	0.412311	0.223607
53	0	0	0	0	0	0	0	0	0	0	0				53	0	0	0.126823	0	0.1	0.223607	0.640312	0.223607	0.1	0	0.1			53	1.1	0.806226	0.424264	0.806226
54	0	0	0	0	0	0	0	0	0	0	0				54	0.1	0	0.585089	0	0.1	0.1	0.223607	0	0.806226	0	0.1			54	0.5	0.806226	0.781025	0.781025
55	0	0	0	0	0	0	0	0	0	0	0				55	0	0	0	0.141421	0	0	0.3	0	1.41421	0.316228	0			55	0.2	0.223607	0.412311	0.223607
56	0	0	0	0	0	0	0	0	0	0	0				56	0	0	0	0	0.2	0.2	0.608276	0.223607	3.40147	0.141421	0.170711			56	0.5	0.316228	0.4	0.4
57	0	0	0	0	0	0	0	0	0	0	0				57	0	0	0	0.141421	0	0.316228	0.905539	0.316228	0.360555	0.316228	0.228825			57	0.728011	0	0.4	0.4
58	0	0	0	0	0	0	0	0	0	0	0				58	0	0	0	0	0	0.3	0.509902	0	1.36015	0.141421	0			58	0.4	0.360555	0	0.360555
59	0	0	0	0	0	0	0	0	0	0	0				59	0	0.4	0.437403	0.2	0.223607	0.2	0	0	1.55242	0.538516	0.211803			59	0.1	0.223607	0.223607	0.223607
60	0	0	0	0	0	0	0	0	0	0	0				60	0.1	0.1	0.231709	0	0.2	0.1	0.223607	0	1.10454	0.2	0.15			60	0	0.538516	0.141421	0.141421
61	0	0	0	0	0	0	0	0	0	0	0				61	0	0.223607	0.184459	0	0.1	0.1	0	0	1.36015	0.141421	0.1			61	0.316228	0.509902	0.2	0.316228
62	0	0	0	0	0	0	0	0	0	0	0				62	0	1.11803	0.963859	0	0.141421	0.2	0	0	0.538516	0.223607	0.170711			62	0.2	0.2	0.67082	0.2
63	0	0	1	0	0	0	0	0	0	0	1				63	0	3.7054	1.15453	0	0.1	0	0	0	0.583095	0	0			63	0.2	0.707107	0.1	0.2
64	0	0	0	0	0	0	0	0	0	0	0				64	0	3.20156	3.74842	0	0	0.1	0	0.1	2	0.1	0.1			64	0	0.1	0.424264	0.1
65	0	0	0	0	0	0	0	0	0	0	0				65	0.360555	4.5607	1.16516	0	0	0.141421	0	0	0.6	0	0.0707107			65	0.447214	0.5	0.1	0.447214
66	0	0	0	0	0	0	0	0	0	0	0				66	0.141421	3.26497	2.55349	0	0	1.06301	0	0.316228	0.1	0.1	0.120711			66	0	0.141421	0.2	0.141421
67	0	0	0	0	0	0	0	0	0	0	0				67	0.223607	0.282843	0.543162	0	0	0.806226	0	0.223607	2.05913	0	0.223607			67	0.141421	0.412311	0.2	0.2
68	0	0	1	0	0	0	0	0	0	0	1				68	0.223607	1.58114	0.933769	0	0.223607	0.4	0	0.316228	2.23607	0.316228	0.316228			68	0.5	1.10454	0.223607	0.5
69	0	0	1	0	0	0	0	0	0	0	1				69	0.316228	1.16619	0.657133	0	0.360555	1.06301	0	0.1	2.69258	0.1	0.338391			69	0.707107	0.5	0.509902	0.509902
70	0	0	1	0	0	0	0	0	0	0	1				70	0.412311	1.1	3.3903	0	1.17047	1.14018	0	0	3.1257	0.316228	0.756155			70	0.223607	1.41421	1.89737	1.41421
71	1	0	0	0	0	0	0	0	0	0	1				71	0.5	2.21359	7.01433	0.2	0.424264	1.56205	0	0.1	1.58114	0.223607	0.462132			71	1.11803	0.921954	3.228	1.11803
72	1	0	0	0	0	0	0	0	1	0	2				72	0.824621	2.42074	1.50497	0.1	0.412311	1.06301	0	2.37697	5.48179	0.1	0.943818			72	0	0.316228	6.50077	0.316228
73	1	0	0	0	0	0	0	0	1	0	2				73	0.509902	1.10454	0.601103	0	0.141421	1.94165	0	1.70294	3.17805	0.282843	0.555503			73	0.3	0.447214	3.42053	0.447214
74	1	0	1	0	0	0	0	0	1	0	3				74	3.4176	0.728011	3.12836	0.4	0.707107	1.74929	0	3.44093	0.4	0.223607	0.717559			74	0.905539	0.806226	6.25412	0.905539
75	1	0	1	0	0	0	0	0	1	0	3				75	6.15971	0.632456	3.58782	0.3	1.61555	2.76586	4.245	0.8	2.68328	0.282843	2.14942			75	1.36015	1.7	1.81032	1.7
76	1	0	0	0	0	0	0	0	1	0	2				76	2.13	0.282843	1.89965	0.1	1.08167	2.33452	2.30217	1.30384	5.42033	1.51327	1.70646			76	1.30384	2.5318	1.13208	1.30384
77	1	0	0	0	0	0	1	0	0	0	2				77	6.30223	1.56205	2.79508	2.22125	2.18403	1.80278	3.04795	0.948683	6.5	1.2083	2.20264			77	1.60312	1.11803	1.2	1.2
78	1	0	0	0	0	0	1	0	0	0	2				78	6.03367	3.8833	2.62762	3.86551	0.67082	0.989949	1.62788	0.509902	1.02956	0.360555	1.32872			78	0.282843	2.06155	0.693802	0.693802
79	1	0	1	0	0	0	1	0	1	0	4				79	2.63911	3.08707	1.04656	5.41202	0.707107	0.67082	5.8679	0.5	1.7088	0.2	1.37768			79	10.5	2.05183	4.9993	4.9993
80	1	0	1	1	0	0	1	0	1	1	6				80	1.02765	2.41661	1.08853	1.34164	7.18679	0.583095	4.8083	2.5807	5.77062	6.46375	2.49865			80	4.97695	1.34536	0.72111	1.34536
81	1	0	1	1	0	0	1	0	1	1	6				81	1.75428	4.51885	1.58968	2.11896	3.13847	1.78885	3.95122	4.42832	4.272	2.99666	3.06757			81	10.7838	0.4	1.47648	1.47648
82	1	1	1	1	0	0	1	0	1	1	7				82	1.18007	3.00167	4.07039	4.94065	1.1	0.412311	1.31386	4.205	2.02485	13.9617	2.51326			82	6.8884	1.11803	4.63604	4.63604
83	1	0	0	0	0	0	1	0	0	1	3				83	0.589149	2.20227	0.939055	2.43516	0.141421	1.7088	0.919556	0.663397	1.52315	2.59422	1.2311			83	8.27345	1.30384	1.8629	1.8629
84	0	0	0	0	0	0	1	0	0	0	1				84	0.44365	3.53412	0.470612	0.447214	0.894427	1.36015	0	2.60412	0.72111	2.11896	0.807769			84	1.56205	2.1095	3.21112	2.1095
85	1	0	0	0	0	0	1	0	0	0	2				85	0.3877	3.32415	0.933989	2.15407	0.141421	1	0.458704	1.86745	0.2	1.62788	0.966995			85	0.447214	1.27279	3.0082	1.27279
86	1	0	0	0	0	0	1	0	0	0	2				86	3.48507	1.34164	1.94165	0.894427	0.82801	0.608276	0.13	1.20587	0.1	2.33452	1.05015			86	1	2.78029	3.81733	2.78029
87	1	0	0	0	0	0	0	1	0	0	2				87	2.60554	3.29848	2.33452	0.412311	1.03452	0.640312	0.20457	2.22623	0.223607	0.707107	0.870812			87	0.538516	2	3.32937	2
88	1	0	0	0	0	0	1	1	0	0	3				88	2.85085	1.44222	2.06155	1.10454	0.328024	1.52971	0.109252	2.13342	0.1	0.223607	1.27338			88	1.84391	1.04403	9.23258	1.84391
89	1	0	0	0	0	0	0	0	0	0	1				89	1.61842	0.2	1.26491	0.282843	0.901457	1	0.164012	4.98781	0.447214	0	0.674335			89	1.40357	0.943398	6.70671	1.40357
90	1	0	0	0	0	1	0	1	0	0	3				90	2.18346	0.1	0.608276	0.8	0.374819	0.632456	0.605851	2.50441	0	0	0.607064			90	1.21655	0.905539	6.01664	1.21655
91	1	0	1	0	1	0	0	1	0	0	4				91	0.800765	0.316228	0.1	0.509902	0.447214	1.80278	0	1.927	0.223607	0	0.381721			91	0.6	0.728011	2.38537	0.728011
92	1	0	0	0	1	0	0	0	0	0	2				92	0.620201	0.824621	0	0	0.141421	0.894427	0.531492	2.61546	0.223607	0.223607	0.37755			92	1.43178	1.0198	4.61736	1.43178
93	1	0	0	0	1	0	1	0	0	0	3				93	1.12667	0.5	0.2	0	0.316228	0.989949	0.295845	2.6038	0	0	0.306036			93	1.3	1.11803	5.87963	1.3
94	1	0	1	0	1	0	1	1	0	0	5				94	0.387	1.40357	1	0.3	0.930334	0.943398	1.12957	1.46431	0	0	0.936866			94	1.20416	0.860233	4.39318	1.20416
95	1	0	0	0	0	0	1	0	0	0	2				95	0.618612	0.3	1.00499	1.17047	0.404554	0.223607	0.503016	3.00233	0.1	0	0.453785			95	0.5	0.632456	4.03113	0.632456
96	1	0	0	0	0	0	1	1	0	0	3				96	0.078	0.141421	0	0.943398	0.522	0.4	1.43962	0.529939	0.640312	0	0.461			96	0.761577	0.632456	1.98494	0.761577
97	1	0	0	0	0	0	0	0	0	0	1				97	0.153154	0.141421	0	0.565685	0	0.424264	0.164806	0.52866	0.1	0	0.147287			97	0.229225	0.707107	2.1587	0.707107
98	0	0	0	0	0	0	1	0	0	0	1				98	0.078	0.141421	0.640312	0.72111	0.131	0.3	0.200689	0.132286	0	0.1	0.136854			98	0.384187	0.447214	3.63456	0.447214
99	1	0	1	0	0	0	1	0	0	0	3				99	0.1	0	0.583095	1.36015	0.745735	0.2	0.78936	2.11514	0	0.2	0.391548			99	1.44147	0.67082	1.51327	1.44147
100	1	0	0	0	0	0	0	0	0	0	1				100	0	0.447214	0.824621	1.27279	1.89783	0.2	0.087	2.06435	0	0	0.323607			100	4.10008	0.141421	3.30606	3.30606
101	1	0	0	0	0	0	1	0	0	0	2				101	0.761725	2.10238	0.761577	3.28938	2.8351	0.2	1.90164	2.28668	0	0	1.33168			101	85.6149	0.583095	1.36015	1.36015
102	1	0	0	0	0	0	1	0	0	0	2				102	3.5483	3.84708	2.61725	1.16619	0.489327	0.141421	3.77887	1.94743	0.1	0	1.55681			102	0	0.1	0.1	0.1
103	1	0	0	0	0	0	1	0	0	0	2				103	1.05973	6.1	1.99249	3.35097	2.46707	0.360555	0.20457	4.27014	0.781025	0	1.52611			103	0	0.316228	1.39284	0.316228
104	1	0	0	0	0	0	1	0	0	0	2				104	0.76269	1.30384	0.707107	1.04656	0.264441	0.632456	0.849868	12.9537	0.2	0	0.734898			104	0	0.509902	0	0
105	1	0	0	0	0	0	1	0	0	0	2				105	0.25242	2.92062	0.1	1.57889	0.279501	0.632456	0.435412	2.05913	0.2	0	0.357457			105	0	0	0	0
106	1	0	1	0	0	0	0	0	0	0	2				106	2.38098	2.30868	1.253	2.57687	0.108853	0.412311	1.57251	7.15052	0.921954	0	1.41275			106	0	0	0	0
107	1	0	0	0	0	0	0	0	0	0	1				107	0.551148	1.60312	0.6	2.33452	5.20005	0.1	0.478716	5.2345	2.11896	0	1.10156			107	0	0.2	0	0
108	1	0	1	0	0	0	0	0	0	0	2				108	0.300002	0.538516	0.447214	2.20907	0.100005	0.447214	0.1	0.6	1.43178	0	0.447214			108	0	0.223607	0	0
109	1	0	0	0	0	0	0	0	0	0	1				109	0	0.67082	0	2.91548	0	0.412311	0	0.223607	0.2	0.360555	0.211803			109	0	0	0	0
110	1	0	0	0	0	0	0	0	0	0	1				110	0.12621	0.67082	0	1.50333	0	0	0	0.761577	0.509902	0.6	0.318056			110	0	0	0.141421	0
111	1	0	0	0	0	0	0	0	0	0	1				111	2.7941	0.583095	1.06593	0.1	0	0.282843	0.217	3.2573	0.3	0.2	0.291421			111	0	0.538516	0.2	0.2
112	0	0	0	0	0	0	0	0	0	0	0				112	0.584811	0.424264	1.03503	0	0	0.141421	0	1.3	1.22066	0.4	0.412132			112	0	0.223607	0.5	0.223607
113	0	0	0	0	0	0	0	0	0	0	0				113	0.435625	2.34307	0.567768	0	0	0.447214	0	1.84391	0.761577	0	0.441419			113	0	0.3	2.30868	0.3
114	0	0	0	0	0	0	0	0	0	0	0				114	0.348	1.28062	0.152398	0	0	0.223607	0.265754	0.728011	0.806226	0.3	0.282877			114	0	0.72111	1.83848	0.72111
115	0	0	0	0	0	0	0	0	0	0	0				115	0.800006	2.44131	0.277937	0	0	0.640312	0.300002	2.9	0.2	0.316228	0.308115			115	0	0	0.360555	0
116	0	0	0	0	0	0	0	0	0	0	0				116	0.107336	2.90689	1.20946	0	0	0.223607	0	1.8868	1.36015	0.2	0.211803			116	0	0.1	1.30384	0.1
117	0	0	0	0	0	0	0	0	0	0	0				117	0.155	1.7088	0.214311	0	0	0.223607	0	0.3	0.894427	0.8	0.218959			117	0	0	2.55539	0
118	0	0	0	0	0	0	0	0	0	0	0				118	0	0.5	0.100005	0	0	0.1	0	0.565685	1.56525	0.360555	0.100002			118	0	0	1.08167	0
119	0	0	0	0	0	0	0	0	0	0	0				119	0	0.538516	0.300002	0	0	0.447214	0	1.13137	2.37065	0.806226	0.373608			119	0	0	0.921954	0
120	0	0	0	0	0	0	0	0	1	0	1				120	0.1	1.84391	0.214311	0	0	0.1	0	1.9105	12.6779	0.8	0.157155			120	0	0	0.67082	0
121	1	0	0	0	0	0	0	0	1	0	2				121	0.582903	0.848528	0	0	0	0	0.435689	0.509902	10.1415	0.921954	0.472796			121	0	0	0.538516	0
122	0	0	0	0	0	1	0	0	1	0	2				122	0.1	0.447214	0.153912	0	0	0	0.204507	3.96989	10.5095	0.316228	0.17921			122	0	0.316228	0.223607	0.223607
123	1	0	0	0	1	0	0	0	1	0	3				123	0.078	1.55242	1.31967	0	0.36389	0	0.238211	1.40357	2.1587	0.2	0.30105			123	0	0.141421	0.2	0.141421
124	1	0	0	0	1	0	0	0	1	0	3				124	0.388	0	0.300002	0	0.044	0	0	0.761577	1.69706	0.1	0.072			124	0	1.14018	0.141421	0.141421
125	1	0	0	0	1	0	0	0	1	0	3				125	0	0	0.230705	0	0	0	2.50851	0.707107	2.83196	0	0			125	0	0.316228	1.70294	0.316228
126	1	0	0	0	0	0	0	0	1	0	2				126	0.62	0	0.401801	0	0	0	0.458704	1.44222	1.61245	0	0.2009			126	0	1.20416	1.51327	1.20416
127	0	0	0	0	0	0	0	0	1	0	1				127	1.62114	0	0.038	0.2	0	0	0	1.83848	10.9567	0	0.019			127	0	2.40832	1.1	1.1
128	0	0	0	0	0	0	0	0	1	0	1				128	0.31	0.2	0	0	0	0.632456	0	0.707107	2.16333	0	0.1			128	0	2.96816	2.5632	2.5632
129	1	0	0	0	0	0	0	0	1	0	2				129	0.107336	0	0.153154	0	0	0.3	0	1.64924	11.6017	0	0.053668			129	0	1.1	1.04403	1.04403
130	0	0	0	0	0	0	0	0	1	0	1				130	0.302655	0	0.483719	0	0.362083	0.848528	0.174	1.13137	5.2	0	0.332369			130	0	0.67082	1.55563	0.67082
131	0	0	0	0	0	0	0	0	1	0	1				131	0.321286	0	0.1853	0	0	1.2	0	1.55563	3.98246	0	0.0926499			131	0	1.80278	4.219	1.80278
132	0	0	0	0	0	0	0	0	0	0	0				132	0.213953	0	0	0	0	1.8868	0	0.583095	0	0	0			132	0	3.20624	3.75366	3.20624
133	0	0	0	0	0	0	0	0	0	0	0				133	0.214311	0.424264	0	0	0	0.860233	0	0.67082	0	0	0			133	0	3.61248	2.34094	2.34094
134	0	0	0	0	0	0	0	0	0	0	0				134	0.107336	0	0.155	0	0	0.538516	0	0.5	0	0.447214	0.053668			134	0	1.56205	0.921954	0.921954
135	0	0	0	0	0	0	0	0	0	0	0				135	0	0.141421	0	0	0	0.984886	0	1.61245	0.412311	0	0			135	0	0.3	1.43178	0.3
136	0	0	0	0	0	0	0	0	0	0	0				136	0	0	0	0	0	1.72627	0.302954	0.640312	0.447214	0.141421	0.0707107			136	0	0.3	0.848528	0.3
137	0	0	0	0	0	0	0	0	0	0	0				137	0	0	0.322372	0	0	1.83848	0.694723	0.2	0.921954	0.1	0.15			137	0	0.565685	0.5	0.5
138	0	0	0	0	0	0	0	0	0	0	0				138	0.117	0	0.184459	0	0	1.31529	0	1.17047	0.5	0	0.0585			138	0	0.1	0.1	0.1
139	0	0	0	0	0	0	0	0	0	0	0				139	0	0	0.214672	0	0	0.1	0	0.1	0.1	0	0			139	0	0	0.360555	0
140	0	0	0	0	0	0	0	0	0	0	0				140	0	0	0	0	0	0.316228	0	0	0	0	0			140	0	0.509902	0.67082	0.509902
141	0	0	0	0	0	0	0	0	0	0	0				141	0.338136	0.3	0	0	0	0.360555	0.200002	0.1	0	0.223607	0.150001			141	0	0.447214	0.141421	0.141421
142	0	0	0	0	0	0	0	0	0	0	0				142	0.001	0.223607	0	0	0	0.360555	0.724276	0.583095	1.04403	0	0.112303			142	0	0.223607	0.3	0.223607
143	0	0	0	0	0	0	0	0	0	0	0				143	0.039	0.223607	0	0	0	0.447214	0.560758	0.223607	0.2	0.1	0.15			143	0	0.223607	0.608276	0.223607
144	0	0	0	0	0	0	0	0	0	0	0				144	0.1853	0.761577	0	0	0	0.2	0.132548	0.223607	0.316228	0	0.158924			144	0	0	0.316228	0
145	0	0	0	0	0	0	0	0	0	0	0				145	0.231709	0.9	0	0	0	0.412311	0.320025	0.2	0.1	0	0.15			145	0	0.223607	0.1	0.1
146	0	0	0	0	0	0	0	0	0	0	0				146	0	0	0	0	0	0.1	0.100005	0	0	0	0			146	0	0.1	0.316228	0.1
147	0	0	0	0	0	0	0	0	0	0	0				147	0	0	0	0	0	0	0.1	0	0	0	0			147	0	0	0.360555	0
148	0	0	0	0	0	0	0	0	0	0	0				148	0.039	0.2	0	0	0	0.8	0.1	0.316228	0	0	0.0195			148	0	0	0.2	0
149	0	0	0	0	0	0	0	0	0	0	0				149	0	0	0	0	0	0	0	0.2	0	0	0			149	0	0.2	0	0
150	0	0	0	0	0	0	0	0	0	0	0				150	0	0	0	0	0	0	0.001	0.282843	0	0	0			150	0	0	0	0
151	0	0	0	0	0	0	0	0	0	0	0				151	0	0.412311	0	0.360555	0	0	0	0	0.1	0	0			151	0	0	0.5	0
152	0	0	0	0	0	0	0	0	0	0	0				152	0.200002	1.1	0	0	0	0	0.13	0	0.707107	0	0			152	0	0	0.5	0
153	0	0	0	0	0	0	0	0	0	0	0				153	0.322008	0.806226	0	0	0	0	0.522	0	9.43398	0	0			153	0	0	0.223607	0
154	0	0	0	0	0	0	0	0	0	0	0				154	0.107336	0.2	0	0	0	0	0.434	0	6.46607	0	0			154	0	0	0	0
155	0	0	0	0	0	0	0	0	0	0	0				155	0.078	0.5	0	0	0	0	0	0	5.16236	0	0			155	0	0	1.48661	0
156	0	0	0	0	0	0	0	0	ND	0	0				156	0	0	0	0	0	0	0	0	ND	0	0			156	0	0	0.1	0
157	0	0	0	0	0	0	0	0	ND	0	0				157	0	0	0	0	0	0	0.218	0	ND	0	0			157	0	0	0.5	0
158	0	0	0	0	0	0	0	0	ND	0	0				158	0	0.6	0	0	0.348	0	0	0	ND	0	0			158	0	0	0	0
159	0	0	0	0	0	0	0	0	ND	0	0				159	0	1.90263	0	0	0	0	0.087	0	ND	0	0			159	0	0	0.223607	0
160	0	0	0	0	0	0	0	0	ND	0	0				160	0.039	0.9	0	0	0	0	0.217	0	ND	0	0			160	0	0	0.632456	0
161	0	0	0	0	0	0	0	0	ND	0	0				161	0	1.7	0	0	0	0	0.3478	0	ND	0	0			161	0	0	0.9	0
162	0	0	0	0	0	0	0	0	ND	0	0				162	0	0.7	0	0	0	0	0.087	0	ND	0	0			162	0	0.1	0.67082	0.1
163	0	0	0	0	0	0	0	0	ND	0	0				163	0	2.10238	0	0	0	0.1	0.346258	0	ND	0.4	0			163	0	1.72047	0.2	0.2
164	0	0	0	0	0	0	0	0	ND	0	0				164	0	0	0	0.1	0	0	0.100001	0	ND	0.3	0			164	0	0.424264	0	0
165	0	0	0	0	0	0	0	0	ND	0	0				165	0	0	0	0	0	0	0	0	ND	0.412311	0			165	0	0.640312	0	0
166	0	0	0	0	0	0	0	0	ND	0	0				166	0	1.51327	0	0	0	0	0	0	ND	0.3	0			166	0	0.3	0	0
167	0	0	0	0	0	0	0	0	ND	0	0				167	0	1.40357	0	0	0	0	0	0	ND	0.2	0			167	0	0.316228	0	0
168	0	0	0	0	0	0	0	0	ND	0	0				168	0	1.2	0	0	0	0.67082	0.501728	0	ND	0.1	0			168	0	0.608276	0	0
169	0	0	0	0	0	0	0	0	ND	0	0				169	0	0.1	0.231709	0	0	0.412311	0.0002	0	ND	0	0			169	0	1.92354	0	0
170	0	0	0	0	0	0	0	0	ND	0	0				170	0	0.1	0.2	0	0	1.3	0.108853	0	ND	0.1	0.1			170	0	1.82483	0	0
171	0	0	0	0	0	0	0	0	ND	0	0				171	0	0.3	0	0	0	0.223607	0	0	ND	0.3	0			171	0	1.55242	0.223607	0.223607
172	0	0	0	0	0	0	0	0	ND	0	0				172	0	0.1	0	0	0	0.761577	0	0	ND	0.2	0			172	0	2.82843	0	0
173	0	0	0	0	0	0	0	0	ND	0	0				173	0	0.1	0	0	0	0.640312	0	0	ND	0.509902	0			173	0	1.6	0	0
174	0	0	0	0	0	0	0	0	ND	0	0				174	0	0	0.077	0	0	1.55242	0.302967	0	ND	0.1	0			174	0	1.7088	0	0
175	0	0	0	0	0	0	0	0	ND	0	0				175	0	0.412311	0	0	0	1.2	0	0	ND	0.3	0			175	0	2.90172	0	0
176	0	0	0	0	0	0	0	0	ND	0	0				176	0	0	0	0	0	1.40357	0	0	ND	0.3	0			176	0	0.6	0	0
177	0	0	0	0	0	0	0	0	ND	0	0				177	0	0.5	0	0	0	1.41421	0	0	ND	0.1	0			177	0	2.32594	0	0
178	0	0	0	0	0	0	0	0	ND	0	0				178	0	0	0.039	0	0.044	1.20416	0	0	ND	0	0			178	0	53.0526	0	0
179	0	0	0	0	0	0	0	0	ND	0	0				179	0	25.9509	0.100005	0	0.043	0.824621	0	0	ND	0	0			179	0	0	0.360555	0
180	0	0	0	0	0	0	0	0	ND	0	0				180	0	0.1	0	0	0	0.824621	0	0	ND	0	0			180	0	0	0.1	0
181	0	0	0	0	0	0	0	0	ND	0	0				181														181

## Sheet: Sheet 3
Sheet 3.	Parameters of mass spawning event in S. intermedius 03 August of 2015, in Kievka Bay
	Blue raws denote the beginning and the end of spawning in males. The cells with figure "1" highlited by green color denote the presence of gamete clots on the aboral surface of males and females.
	Male spawning events												Step length of males, cm											Step length of nonspawners, cm
Time, min	Male-1	Male-2	Male-3	Male-4	Male-5	Male-8	Male-9	Dynamics of male spawning				Time, min	Male-1	Male-2	Male-3	Male-4	Male-5	Male-8	Male-9	Median step length			Time, min	Nonsp-1	Nonsp-2	Nonsp-3	Median step length
1	0	0	0	0	0	0	0	0				1											1
2	0	0	0	0	0	0	0	0				2	0.2	0.2	0.223607	1.17047	0.5	0.1	0.447214	0.223607			2	0.220302	1.15317	0.29935	0.29935
3	0	0	0	0	0	0	0	0				3	0.1	0.1	0.316228	0.3	0.4	0	0.3	0.3			3	0.311554	0.295567	1.37226	0.311554
4	0	0	0	0	0	0	0	0				4	0.3	0	0.1	0	0.1	0.538516	0.4	0.1			4	0.0985222	0	1.5071	0.0985222
5	0	0	0	0	0	0	0	0				5	0	0.565685	0.2	0	0	0	0.707107	0			5	0.86755	0	0.348493	0.348493
6	0	0	0	0	0	0	0	0				6	0	0	0.412311	0	0	0	0.2	0			6	#VALUE!	0	0.618603	#VALUE!
7	0	0	0	0	0	0	0	0				7	0	0	0.360555	0.806226	0	0.223607	0.141421	0.141421			7	0.301036	0.597267	2.10616	0.597267
8	0	0	0	0	0	0	0	0				8	0.2	0.2	0.412311	0.282843	0	0.223607	0.1	0.2			8	0.406217	0.278663	0.574478	0.406217
9	0	0	0	0	0	0	0	0				9	0.412311	0.538516	0	0	0	0.4	0.141421	0.141421			9	0	0	0.90833	0
10	0	0	0	0	0	0	0	0				10	0.1	0	0	0	0	0.2	0.282843	0			10	0	0	0.220302	0
11	0	0	0	0	0	0	0	0				11	0.6	0.1	0	0	0	0.2	0.2	0.1			11	0	0	1.93565	0
12	0	0	0	0	0	0	0	0				12	0	0.141421	0.4	0	0	0.2	0	0			12	0.394089	0	0.835988	0.394089
13	0	0	0	0	0	0	0	0				13	0.538516	0.761577	0	0	0	0.1	0.1	0.1			13	0	0	1.89511	0
14	0	0	0	0	0	0	0	0				14	0	0.894427	0.1	0	0	0	0	0			14	0.0985222	0	1.37931	0.0985222
15	0	0	0	0	0	0	0	0				15	0	0.632456	0.509902	0	0	0.2	0	0			15	0.502366	0	1.81666	0.502366
16	0	0	0	0	0	0	0	0				16	0.1	0.316228	0	0	0	0	0.2	0			16	0	0	1.41062	0
17	0	0	0	0	0	0	0	0				17	0	0.1	0	0	0	0	0	0			17	0	0	1.32181	0
18	0	0	0	0	0	0	0	0				18	0.2	0.223607	0.316228	0	0	0	0.1	0.1			18	0.311554	0	1.91295	0.311554
19	0	0	0	0	0	0	0	0				19	0.447214	0.223607	0.2	2.00998	0	0.316228	0	0.223607			19	0.197044	1.98027	0.660907	0.660907
20	0	0	0	0	0	0	0	0				20	0.1	0.141421	0	3.11127	0	0.316228	0	0.1			20	0	3.06529	0.599287	0.599287
21	0	0	0	0	0	0	0	0				21	0.282843	0.538516	0.223607	1.02956	0	0.4	0.223607	0.282843			21	0.220302	1.01435	0.492611	0.492611
22	0	0	0	0	0	0	0	0				22	0	0.223607	0	1.7	0	0	0.223607	0			22	0	1.67488	0.750322	0.750322
23	0	0	0	0	0	0	0	0				23	0	0.1	0	1.02956	0	0	0	0			23	0	1.01435	0.985222	0.985222
24	0	0	0	0	0	0	0	0				24	0	0.3	0.316228	2.19317	0	0	0	0			24	0.311554	2.16076	0	0.311554
25	0	0	0	0	0	0	0	0				25	0	0	0	0.728011	0	0	0	0			25	0	0.126119	0.750322	0.126119
26	0	0	0	0	0	0	0	0				26	0	0.360555	0	0.806226	0	0	0	0			26	0	0.794311	0.417994	0.417994
27	0	0	0	0	0	0	0	0				27	0.921954	0.2	0.223607	0.447214	0	0	0	0.2			27	0.220302	1.11766	0.0985222	0.220302
28	0	0	0	0	0	0	0	0				28	0.447214	0.1	0.1	3.05941	0	0	0.1	0.1			28	0.0985222	1.32548	0.139331	0.139331
29	0	0	0	0	0	0	0	0				29	0.316228	0.1	0.282843	1.80278	0	0	0.1	0.1			29	0.278663	1.50388	0.406217	0.406217
30	0	0	0	0	0	0	0	0				30	0.141421	0.2	0.1	4.51774	0	0	0.1	0.1			30	0.0985222	1.14896	0.278663	0.278663
31	0	0	0	0	0	0	0	0				31	0.282843	0	0.316228	1.56205	0	0	0.3	0.282843			31	0.311554	0.220302	0.892156	0.311554
32	0	0	0	0	0	0	0	0				32	0	0.1	0	2.30868	0	0.1	0	0			32	0	1.46464	0.197044	0.197044
33	0	0	0	0	0	0	0	0				33	0	0	0.360555	1.52643	0	0	0	0			33	0.355227	1.01435	0.717252	0.717252
34	0	0	0	0	0	0	0	0				34	0.1	0.141421	0.141421	1.16619	0	0	0	0.1			34	0.139331	1.50388	0.220302	0.220302
35	0	0	0	0	0	0	0	0				35	0.1	0.141421	0	0.223607	0	0	0	0			35	0	1.23448	0.295567	0.295567
36	0	0	0	0	0	0	0	0				36	0.1	0	0	1.48661	0	0	0.1	0			36	0	1.04731	0.295567	0.295567
37	0	0	0	0	0	0	0	0				37	0	0	0.1	1.02956	0	0	0	0			37	0.0985222	0.769483	0.406217	0.406217
38	0	0	0	0	0	0	0	0				38	0	0	0	1.52643	0	0	0.2	0			38	0	0.311554	0.660907	0.311554
39	0	0	0	0	0	0	0	0				39	0.316228	0	0.316228	1.253	0	0	0	0			39	0.311554	1.46464	0.417994	0.417994
40	0	0	0	0	0	0	0	0				40	0	0.2	0	1.06301	0	1.21655	0.141421	0.141421			40	0	0.591133	2.09461	0.591133
41	0	0	0	0	0	0	0	0				41	0	0.921954	0.2	0.781025	0	0.67082	0.2	0.2			41	0.197044	0.278663	1.01435	0.278663
42	0	0	0	0	0	0	0	0				42	0.2	0.72111	0.1	0.316228	0	3.45398	0	0.2			42	0.0985222	0.278663	1.28457	0.278663
43	0	0	0	0	0	0	0	0				43	0	0.3	0.223607	1.48661	0	1.14018	0	0.223607			43	0.220302	1.31445	0.197044	0.220302
44	0	0	0	0	0	0	0	0				44	0	0.1	0.412311	0.6	0	2.55539	0	0.1			44	0.406217	1.01435	0.197044	0.406217
45	0	0	0	0	0	0	0	0				45	0.141421	0.1	0	0.282843	0	5.90762	0.3	0.141421			45	0	0.710453	0.295567	0.295567
46	0	0	0	0	0	0	0	0				46	0	0	0	0.282843	0	0.72111	0	0			46	0	0.278663	0.492611	0.278663
47	0	0	0	0	0	0	0	0				47	0	0.316228	0	1.33417	0	1.31529	0.1	0.1			47	0	0.355227	0.492611	0.355227
48	0	0	0	0	0	0	0	0				48	0	0	0.2	1.02956	0	0	0	0			48	0.197044	1.20262	0.295567	0.295567
49	0	0	0	0	0	0	0	0				49	0	0	0.583095	0.72111	0	0.583095	0.223607	0.223607			49	0.574478	1.85106	0.502366	0.574478
50	0	0	0	0	0	0	0	0				50	0	0.1	0	0.282843	0	0.583095	0	0			50	0	1.15317	0.139331	0.139331
51	0	0	0	0	0	0	0	0				51	0	0	0.141421	0.360555	0	0.316228	0	0			51	0.139331	0.220302	0.406217	0.220302
52	0	0	0	0	0	0	0	0				52	0	0.1	1.1	1.22066	0	0.1	0.806226	0.1			52	1.08374	0.794311	0.417994	0.794311
53	0	0	0	0	0	0	0	0				53	0	0.824621	0.5	1.87883	0.565685	0	0.806226	0.565685			53	0.492611	0.794311	0.769483	0.769483
54	0	0	0	0	0	0	0	0				54	0	0.1	0.2	1.17047	0	0.412311	0.2	0.2			54	0.197044	0.220302	0.406217	0.220302
55	0	0	0	0	0	0	0	0				55	0	0.3	0.5	0.223607	1.39284	0	0	0.223607			55	0.492611	0.311554	0.394089	0.394089
56	0	0	0	0	0	0	0	0				56	0	0.1	0.728011	0.806226	0.424264	0.921954	0	0.424264			56	0.717252	0	0.394089	0.394089
57	0	0	0	0	0	0	0	0				57	0	0.2	0.4	0.806226	0.223607	0.447214	0	0.223607			57	0.394089	0.355227	0	0.355227
58	0	0	0	0	0	0	0	0				58	0	0.223607	0.1	0.223607	0.360555	0.824621	0	0.223607			58	0.0985222	0.220302	0.220302	0.220302
59	0	0	0	0	0	0	0	0				59	0	0	0	0.316228	0.316228	0.3	0	0			59	0	0.530558	0.139331	0.139331
60	0	0	0	0	0	0	0	0				60	0	0	0.316228	0	1.23693	0	0.282843	0			60	0.311554	0.502366	0.197044	0.311554
61	0	0	0	0	0	0	0	0				61	0.3	0	0.2	0.360555	2.05913	0.360555	0	0.3			61	0.197044	0.197044	0.660907	0.197044
62	0	0	0	0	0	0	0	0				62	0.141421	0.141421	0.2	0.223607	6.15549	0.3	0.412311	0.223607			62	0.197044	0.696657	0.0985222	0.197044
63	0	0	0	0	0	0	0	0				63	0	0.1	0	0.538516	2.33238	0.728011	0.1	0.1			63	0	0.0985222	0.417994	0.0985222
64	0	0	0	0	0	0	0	0				64	0	0.316228	0.447214	0.509902	3.92046	0	0.860233	0.447214			64	0.440605	0.492611	0.0985222	0.440605
65	0	0	0	0	0	0	0	0				65	0.1	0	0	0.2	1.74642	0	0	0			65	0	0.139331	0.197044	0.139331
66	0	0	0	0	1	0	0	1				66	0.707107	0.412311	0.141421	0.707107	1.80278	0	0.1	0.412311			66	0.139331	0.406217	0.197044	0.197044
67	0	0	0	1	1	0	0	2				67	0.632456	0.424264	0.5	0.1	0.640312	0	0.1	0.424264			67	0.492611	1.08821	0.220302	0.492611
68	0	0	0	1	1	0	0	2				68	0.2	0.447214	0.707107	0.5	5.3	0	0.6	0.5			68	0.696657	0.492611	0.502366	0.502366
69	0	0	0	1	0	0	0	1				69	0.781025	0.447214	0.223607	0.141421	10.0439	0.3	0	0.3			69	0.220302	1.39331	1.86933	1.39331
70	0	0	0	1	0	0	0	1				70	0.9	2.19317	1.11803	0.412311	2.82312	1.69706	0.1	1.11803			70	1.10151	0.90833	3.1803	1.10151
71	0	0	0	0	0	0	0	0				71	0.948683	5.40093	0	1.10454	0.824621	1.06301	0.316228	0.948683			71	0	0.311554	6.4047	0.311554
72	0	0	0	0	1	1	0	2				72	5.25547	4.94065	0.3	0.5	5.2469	3.54683	0.223607	3.54683			72	0.295567	0.440605	3.36998	0.440605
73	0	0	0	0	1	1	0	2				73	9.63379	7.08025	0.905539	1.41421	4.34166	0.223607	0.728011	1.41421			73	0.892156	0.794311	6.16169	0.892156
74	0	0	0	0	0	1	0	1				74	3.062	5.11077	1.36015	0.921954	4.16293	6.62118	0.781025	3.062			74	1.34005	1.67488	1.78357	1.67488
75	0	0	0	0	0	1	0	1				75	9.92924	0.72111	1.30384	0.316228	3.38378	7.70779	4.20595	3.38378			75	1.28457	2.49438	1.11535	1.28457
76	0	0	0	0	0	1	0	1				76	8.95077	2.69072	1.60312	0.447214	4.27551	3.5805	7.33757	3.5805			76	1.57943	1.10151	1.18227	1.18227
77	0	0	0	0	0	1	0	1				77	3.41685	1.22066	0.282843	0.806226	1.43178	3.9	6.5307	1.43178			77	0.278663	2.03109	0.683549	0.683549
78	0	0	1	0	1	1	1	4				78	1.60838	2.20907	10.5	1.7	2.35372	1.36015	3.01496	2.20907			78	10.3448	2.02151	0.984536	2.02151
79	0	0	1	0	0	1	1	3				79	2.08491	3.51141	4.97695	2.5318	10.9202	0.984886	3.83275	3.51141			79	4.9034	1.32548	0.710453	1.32548
80	0	1	1	0	0	1	1	4				80	1.04916	3.89487	10.7838	1.11803	7.64853	8.78009	5.2811	5.2811			80	10.6244	0.394089	1.45466	1.45466
81	0	1	1	0	0	0	0	2				81	5.15918	1.67631	6.8884	2.06155	5.09608	1.31529	2.28473	2.28473			81	6.7866	1.10151	2.59709	2.59709
82	0	0	0	0	0	1	0	1				82	4.99058	1.5	8.27345	2.05183	2.20907	0.608276	1	2.05183			82	8.15118	1.28457	1.83537	1.83537
83	0	0	0	1	0	1	0	2				83	0.116604	1.43178	1.56205	1.34536	2.94279	0.1	2.14009	1.43178			83	1.53897	2.07833	3.16366	2.07833
84	0	0	0	0	0	1	0	1				84	5.34816	0.707107	0.447214	0.4	1.20416	0	2.77849	0.707107			84	0.440605	1.25398	2.96375	1.25398
85	0	1	0	0	0	1	0	2				85	3.75759	2.48395	1	1.11803	0.943398	0.565685	2.83196	1.11803			85	0.985222	2.7392	3.76092	2.7392
86	0	1	0	0	0	0	0	1				86	4.37672	5.98164	0.538516	1.30384	1.58114	0.360555	3.25576	1.58114			86	0.530558	1.97044	3.28017	1.97044
87	0	0	0	0	0	1	0	1				87	2.77849	4.75395	1.84391	2.1095	2	1.86815	3.1257	2.1095			87	1.81666	1.0286	9.09614	1.81666
88	0	0	0	0	0	0	0	0				88	2.77849	3.47851	1.40357	1.27279	0	0.447214	1.0198	1.27279			88	1.38282	0.929456	6.6076	1.38282
89	0	0	0	0	0	0	1	1				89	0.905539	6.77422	1.21655	2.78029	0	1.34164	0	1.21655			89	1.19857	0.892156	5.92773	1.19857
90	0	0	0	0	0	0	0	0				90	1.62788	5.80517	0.6	2	0.640312	0.761577	0.282843	0.761577			90	0.591133	0.717252	2.35012	0.717252
91	0	0	1	0	0	1	0	2				91	1.58368	3.29848	1.43178	1.04403	0.360555	1.42127	0.640312	1.42127			91	1.41062	1.00473	4.54912	1.41062
92	0	0	1	0	0	1	1	3				92	0.410951	0.632456	1.3	0.943398	0.781025	1.8868	1	0.943398			92	1.28079	1.10151	5.79273	1.28079
93	0	0	0	0	0	1	0	1				93	1.66671	9.15478	1.20416	0.905539	1.34164	1.7088	1.45602	1.45602			93	1.18636	0.84752	4.32825	1.18636
94	0	0	0	0	0	1	0	1				94	0.515326	3.64005	0.5	0.728011	0.8544	2.78568	0.608276	0.728011			94	0.492611	0.623109	3.97156	0.623109
95	0	0	0	0	0	0	0	0				95	0.156205	3.98497	0.761577	1.0198	0.707107	0.583095	0.316228	0.707107			95	0.750322	0.623109	1.95561	0.750322
96	0	0	0	0	1	1	0	2				96	0.156205	2.22036	0.223607	1.11803	0.4	0.761577	0.943398	0.761577			96	0.225837	0.696657	2.1268	0.696657
97	0	1	0	0	1	1	1	4				97	0.1	0.1	0.424264	0.860233	2.64764	1.50333	0.824621	0.824621			97	0.37851	0.440605	3.58084	0.440605
98	0	0	0	0	0	0	0	0				98	0	0	1.40357	0.632456	ND	0.141421	1.26491	0.386938			98	1.42017	0.660907	1.49091	1.42017
99	0	0	0	0	1	1	0	2				99	0	0.781025	4.12311	0.632456	ND	3.01496	1.06301	0.92202			99	4.03948	0.139331	1.28675	1.28675
100	0	0	0	0	1	1	0	2				100	6.30244	1.08167	ND	0.707107	ND	5.33667	4.49222	4.49222			100	0	0.574478	1.34005	0.574478
101	0	0	0	0	1	1	0	2				101	1.36015	0.608276	ND	0.447214	ND	0.141421	2.66271	0.608276			101	0	0.0985222	0.0985222	0.0985222
102	0	0	0	0	1	1	0	2				102	1	1.80278	ND	0.67082	ND	1.20416	1.43178	1.20416			102	0	0.311554	1.37226	0.311554
103	0	0	0	0	0	0	0	0				103	0	0.860233	ND	0.141421	ND	1.67631	0.860233	0.860233			103	0	0.502366	0	0
104	0	0	0	0	0	0	0	0				104	3.81477	0.223607	ND	0.583095	ND	2.20227	1.58114	1.58114			104	0	0	0	0
105	0	0	0	0	0	0	0	0				105	0.404475	1.00499	ND	0.1	ND	0	0.223607	0.223607			105	0	0	0	0
106	0	0	0	0	0	0	0	0				106	0.5	0.583095	ND	0.316228	ND	0.3	1.07703	0.5			106	0	0.197044	0	0
107	0	0	0	0	0	0	0	0				107	0.32311	0.223607	ND	0.509902	ND	0	0.72111	0.32311			107	0	0.220302	0	0
108	0	0	0	0	0	0	0	0				108	0.233238	0.316228	ND	0	ND	0	0.781025	0.233238			108	0	0	0	0
109	0	0	0	0	0	0	0	0				109	0.599	1.253	ND	0	ND	0	0.412311	0.412311			109	0	0	0.139331	0
110	0	0	0	0	0	0	0	0				110	3.96636	3.00167	ND	0.2	ND	0.3	2.37065	2.37065			110	0	0.530558	0.197044	0.197044
111	0	0	0	0	0	0	0	0				111	1.64643	5.51543	ND	0.223607	ND	0.2	2.74591	1.64643			111	0	0.220302	0.492611	0.220302
112	0	0	0	0	0	0	0	0				112	0.770896	11.6039	ND	0	ND	0	0.447214	0.447214			112	0	0.295567	2.27456	0.295567
113	0	0	0	0	0	0	0	0				113	0	2.77849	ND	0	ND	0.2	0.412311	0.2			113	0	0.710453	1.81131	0.710453
114	0	0	0	0	0	0	0	0				114	1.2015	4.88774	ND	0.538516	ND	0.5	0.6	0.6			114	0	0	0.355227	0
115	0	0	0	0	0	0	0	0				115	0.305941	3.3541	ND	0.223607	ND	0.360555	2.1095	0.360555			115	0	0.0985222	1.28457	0.0985222
116	0	0	0	0	0	0	0	0				116	0	2.60768	ND	0.3	ND	0.141421	0.806226	0.3			116	0	0	2.51762	0
117	0	0	0	0	0	0	0	0				117	0.468001	1.17047	ND	0.72111	ND	0.141421	1.20416	0.72111			117	0	0	1.06568	0
118	0	0	0	0	0	0	0	0				118	0	0.921954	ND	0	ND	0.2	0.921954	0.2			118	0	0	0.90833	0
119	0	0	0	1	0	0	0	1				119	0.116722	1.3	ND	0.1	ND	0	0.3	0.116722			119	0	0	0.660907	0
120	0	0	0	1	0	0	0	1				120	0	1.44222	ND	0	ND	0	0.848528	0			120	0	0	0.530558	0
121	0	0	0	1	0	0	0	1				121	0.785392	0.1	ND	0	ND	0	1	0.1			121	0	0.311554	0.220302	0.220302
122	0	0	0	1	0	0	0	1				122	0.465188	3.48281	ND	0	ND	0	1.80278	0.465188			122	0	0.139331	0.197044	0.139331
123	0	0	0	0	0	0	0	0				123	0.18	1.98494	ND	0	ND	0.141421	1.11803	0.18			123	0	1.12333	0.139331	0.139331
124	0	0	0	0	0	0	0	0				124	0.269072	3.55106	ND	0	ND	3.63456	1.58114	1.58114			124	0	0.311554	1.67777	0.311554
125	1	0	0	0	0	0	0	1				125	1.00483	3.60555	ND	0.316228	ND	0.5	0.761577	0.761577			125	0	1.18636	1.49091	1.18636
126	1	0	0	0	0	0	0	1				126	1.85196	2.82843	ND	0.141421	ND	2.5318	0.316228	1.85196			126	0	2.37273	1.08374	1.08374
127	0	0	0	0	0	0	0	0				127	0.259077	0.565685	ND	1.14018	ND	0	0.316228	0.316228			127	0	2.9243	1.5401	1.5401
128	1	0	0	0	0	0	0	1				128	0.4	0.509902	ND	0.316228	ND	0	1.28062	0.4			128	0	1.08374	1.0286	1.0286
129	1	1	0	0	0	0	0	2				129	0.602993	3.61248	ND	1.20416	ND	0	0.5	0.602993			129	0	0.660907	1.53265	0.660907
130	0	0	0	0	0	0	0	0				130	0.06	0.781025	ND	2.40832	ND	0.1	0.141421	0.141421			130	0	1.77613	4.15665	1.77613
131	1	0	0	0	0	0	0	1				131	0	0.632456	ND	2.96816	ND	0	0.223607	0.223607			131	0	1.18842	3.69819	1.18842
132	1	0	0	0	0	0	0	1				132	0	2.28035	ND	1.1	ND	0.1	0.509902	0.509902			132	0	0.559092	2.30634	0.559092
133	1	0	0	0	0	0	0	1				133	0	0.806226	ND	0.67082	ND	0	0.412311	0.412311			133	0	1.53897	0.90833	0.90833
134	1	0	0	0	0	0	0	1				134	0	0.8544	ND	1.80278	ND	0.2	0.1	0.2			134	0	0.295567	1.41062	0.295567
135	1	0	0	0	0	0	0	1				135	0	0	ND	3.20624	ND	0	1.20416	0			135	0	0.295567	0.835988	0.295567
136	1	0	0	0	0	0	0	1				136	0	0	ND	3.61248	ND	0.223607	0.223607	0.223607			136	0	0.557326	0.492611	0.492611
137	1	0	0	0	0	0	0	1				137	0	0.538516	ND	1.56205	ND	0.223607	0.141421	0.223607			137	0	0.0985222	0.0985222	0.0985222
138	1	0	0	0	0	0	0	1				138	0	0.282843	ND	0.3	ND	0	0.538516	0.282843			138	0	0	0.355227	0
139	0	0	0	0	0	0	0	0				139	0	0	ND	0.3	ND	0	0.509902	0			139	0	0.502366	0.660907	0.502366
140	0	0	0	0	0	0	0	0				140	0	0	ND	0.565685	ND	0	0.223607	0			140	0	0.440605	0.139331	0.139331
141	0	0	0	0	0	0	0	0				141	0.259077	0	ND	0.1	ND	0	0.141421	0.1			141	0	0.220302	0.295567	0.220302
142	0	0	0	0	0	0	0	0				142	0.208806	0	ND	0	ND	0.608276	0.3	0.208806			142	0	0.220302	0.599287	0.220302
143	0	0	0	0	0	0	0	0				143	0.384187	0.360555	ND	0.509902	ND	0	0	0.360555			143	0	0	0.311554	0
144	0	0	0	0	0	0	0	0				144	0	0.608276	ND	0.447214	ND	0	0.424264	0.424264			144	0	0.220302	0.0985222	0.0985222
145	0	0	0	0	0	0	0	0				145	0	0	ND	0.223607	ND	0	0.282843	0			145	0	0.0985222	0.311554	0.0985222
146	0	0	0	0	0	0	0	0				146	0.3	0.707107	ND	0.223607	ND	0	0.223607	0.223607			146	0	0	0.355227	0
147	0	0	0	0	0	0	0	0				147	0	0.223607	ND	0	ND	0	0.1	0			147	0	0	0.197044	0
148	0	0	0	0	0	0	0	0				148	0	0.1	ND	0.223607	ND	0.6	0.141421	0.141421			148	0	0.197044	0	0
149	0	0	0	0	0	0	0	0				149	0	0.806226	ND	0.1	ND	0.1	0.141421	0.1			149	0	0	0	0
150	0	0	0	0	0	0	0	0				150	0	0	ND	0	ND	2.21359	0.223607	0			150	0	0	0.492611	0
151	0	0	0	0	0	0	0	0				151	0	1.56205	ND	0	ND	2.63059	0.565685	0.565685			151	0	0	0.492611	0
152	0	0	0	0	0	0	0	0				152	0	1.33417	ND	0.2	ND	0.1	0.67082	0.2			152	0	0	0.220302	0
153	0	0	0	0	0	0	0	0				153	0	2.46982	ND	0	ND	0	0	0			153	0	0	0	0
154	0	0	0	0	0	0	0	0				154	0	1.44222	ND	0	ND	0	0	0			154	0	0	1.46464	0
155	0	0	0	0	0	0	0	0				155	0	2.35372	ND	0	ND	0	0.1	0			155	0	0	0.0985222	0
156	0	0	0	0	0	0	0	0				156	0	2.92746	ND	0	ND	0.316228	0	0			156	0	0	0.492611	0
157	0	0	0	0	0	0	0	0				157	0	1.31529	ND	0	ND	0	0	0			157	0	0	0	0
158	0	0	0	0	0	0	0	0				158	0	4.42719	ND	0	ND	0	0	0			158	0	0	0.220302	0
159	0	0	0	0	0	0	0	0				159	0	0	ND	0	ND	0	0	0			159	0	0	0.623109	0
160	0	0	0	0	0	0	0	0				160	0.26	0	ND	0	ND	0.1	0	0			160	0	0	0.8867	0
161	0	0	0	0	0	0	0	0				161	0.208806	0	ND	0	ND	0	0.1	0			161	0	0.0985222	0.660907	0.0985222
162	0	0	0	0	0	0	0	0				162	0	0	ND	0	ND	0.1	0.2	0			162	0	1.69504	0.197044	0.197044
163	0	0	0	0	0	0	0	0				163	0.24	0	ND	0	ND	0.1	0.316228	0.1			163	0	0.417994	0	0
164	0	0	0	0	0	0	0	0				164	0.419	0	ND	0	ND	0.360555	0	0			164	0	0.63085	0	0
165	0	0	0	0	0	0	0	0				165	0.430768	0	ND	0.1	ND	0	0	0			165	0	0.295567	0	0
166	0	0	0	0	0	0	0	0				166	0	0	ND	1.72047	ND	0.1	0	0			166	0	0.311554	0	0
167	0	0	0	0	0	0	0	0				167	0.116619	0.608276	ND	0.424264	ND	0	0.141421	0.141421			167	0	0.599287	0	0
168	0	0	0	0	0	0	0	0				168	0.12	0.6	ND	0.640312	ND	0.223607	0	0.223607			168	0	1.89511	0	0
169	0	0	0	0	0	0	0	0				169	0	0.608276	ND	0.3	ND	0.141421	0	0.141421			169	0	1.79786	0	0
170	0	0	0	0	0	0	0	0				170	0.12	1.21655	ND	0.316228	ND	0	0.2	0.2			170	0	1.52948	0.220302	0.220302
171	0	0	0	0	0	0	0	0				171	0	1.10454	ND	0.608276	ND	0	0.1	0.1			171	0	2.78663	0	0
172	0	0	0	0	0	0	0	0				172	0	0.509902	ND	1.92354	ND	0	0	0			172	0	1.57635	0	0
173	0	0	0	0	0	0	0	0				173	0	0.412311	ND	1.82483	ND	0	0.538516	0.412311			173	0	1.68355	0	0
174	0	0	0	0	0	0	0	0				174	0	0	ND	1.55242	ND	0	0.223607	0			174	0	2.85884	0	0
175	0	0	0	0	0	0	0	0				175	0	2.76586	ND	2.82843	ND	0	0.1	0.1			175	0	0.591133	0	0
176	0	0	0	0	0	0	0	0				176	0	1.45602	ND	1.6	ND	0	0.3	0.3			176	0	2.29157	0	0
177	0	0	0	0	0	0	0	0				177	0	0.905539	ND	1.7088	ND	0	0.2	0.2			177	0	#VALUE!	0	#VALUE!
178	0	0	0	0	0	0	0	0				178	0	0.3	ND	2.90172	ND	0	0	0			178	0	#VALUE!	0.355227	#VALUE!
179	0	0	0	0	0	0	0	0				179	0.18	0	ND	0.6	ND	0	0.141421	0.141421			179	0	#VALUE!	0.0985222	#VALUE!
180	0	0	0	0	0	0	0	0				180	0	0	ND	2.32594	ND	ND	0.141421	0.0707107			180	0	#VALUE!	0	#VALUE!
181	0	0	0	0	0	0	0	0

## Sheet: Sheet 4
Sheet 4.		Parameters of mass spawning event in S. intermedius 14 September of 2015, in Kievka Bay
		Blue raws denote the beginning and the end of spawning in males, red raws denote the beginning and the end of spawning in females. The cells with figure "1" highlited by green color denote the presence of gamete clots on the aboral surface of males and females.
						Male spawning events																Step length of males, cm													Female spawning events							Step length of females, cm						Step length of nonspawners, cm
Time, min	Male-1	Male-10	Male-11	Male-12	Male-13	Male-3	Male-4	Male-5	Male-6	Male-7	Male-8	Male-9	Dynamics of male spawning			Time, min	Male-1	Male-10	Male-11	Male-12	Male-13	Male-3	Male-4	Male-5	Male-6	Male-7	Male-8	Male-9	Median step length					Time, min	Female-1						Time, min	Female-1					Time, min	Nonsp-10	Nonsp-11
1	0	0	0	0	0	0	0	0	0	0	0	0	0			1																		1	0						1						1
2	0	0	0	0	0	0	0	0	0	0	0	0	0			2	0	0	0	1.06301	0.310876	0	0	0.360555	0	0	0	0.553754	0					2	0						2	0					2	0	0.291452
3	0	0	0	0	0	0	0	0	0	0	0	0	0			3	0	0	0	0.1	0.592021	0	0	0.316228	0	0	0	0	0					3	0						3	0					3	0	0.265
4	0	0	0	0	0	0	0	0	0	0	0	0	0			4	0	0	0	0.223607	0.08	0	0	0.316228	0	0	0	0.079	0					4	0						4	0.848528					4	0	0.291452
5	0	0	0	0	0	0	0	0	0	0	0	0	0			5	0	0	0	0	0.2	0	0.141421	0.1	0	0	0	0.430443	0					5	0						5	0.223607					5	0.1	0.291452
6	0	0	0	0	0	0	0	0	0	0	0	0	0			6	0	0	0	0	0.215037	0.2	0	0.316228	0	0	0	0.506203	0					6	0						6	0					6	0	0.234401
7	0	0	0	0	0	0	0	0	0	0	0	0	0			7	0.282843	0	0	0	0.079	0	0	0.141421	0	0.079	0	0	0					7	0						7	0					7	0	0
8	0	0	0	0	0	0	0	0	0	0	0	0	0			8	0	0	0	0	0.3	0	0	0.316228	0	0.08	0	0.079	0					8	0						8	0					8	0	0
9	0	0	0	0	0	0	0	0	0	0	0	0	0			9	0	0	0.1	0	0.397	0.2	0	0.2	0	0.187832	0	0	0					9	0						9	0.141421					9	0	0.1
10	0	0	0	0	0	0	0	0	0	0	0	0	0			10	0	0	0	0.141421	0.310227	0	0	0.223607	0	0	0	0	0					10	0						10	0					10	0	0.113177
11	0	0	0	0	0	0	0	0	0	0	0	0	0			11	0	0	0	0	0.443639	0	0	0.2	0.565685	0	0	0.2	0					11	0						11	0.447214					11	0	0.106
12	0	0	0	0	0	0	0	0	0	0	0	0	0			12	0	0	0	0	0.332399	0	0	0.412311	0	0	0	0	0					12	0						12	0					12	0	0.28324
13	0	0	0	0	0	0	0	0	0	0	0	0	0			13	0	0	0	0	0.510381	0	0	0.447214	0.1	0	0	0	0					13	0						13	0					13	0.4	0.2
14	0	0	0	0	0	0	0	0	0	0	0	0	0			14	0	0	0	0.1	0.08	0	0	0.1	0	0	0	0.215407	0					14	0						14	0					14	0	0.234401
15	0	0	0	0	0	0	0	0	0	0	0	0	0			15	0	0	0	0	0.079	0	0	0.223607	0	0.2	0	0	0					15	0						15	0					15	0	0.1
16	0	0	0	0	0	0	0	0	0	0	0	0	0			16	0	0	0	0	0.486391	0	0.632456	0.223607	0	0	0	0	0					16	0						16	0					16	0	0
17	0	0	0	0	0	0	0	0	0	0	0	0	0			17	0	0	0	0	0.238	0	0.1	0.3	0	0	0	0	0					17	0						17	0					17	0	0
18	0	0	0	0	0	0	0	0	0	0	0	0	0			18	0	0	0	0	0.255501	0	0.1	0.2	0	0	0	0	0					18	0						18	0					18	0	0
19	0	0	0	0	0	0	0	0	0	0	0	0	0			19	0	0	0	0	0.562864	0	0	0.2	0.2	0	0	0.717831	0					19	0						19	0					19	0.316228	0
20	0	0	0	0	0	0	0	0	0	0	0	0	0			20	0	0	0	0	0.310227	0	0	0.316228	0	0	0.4	0.258155	0					20	0						20	0					20	0.2	0
21	0	0	0	0	0	0	0	0	0	0	0	0	0			21	0	0	0	0	0.238	0	0.447214	0.1	0	0	0	0.258	0					21	0						21	0					21	0	0.106
22	0	0	0	0	0	0	0	0	0	0	0	0	0			22	0	0	0	0.141421	0.238	0	0.583095	0.1	0	0	0	0	0					22	0						22	0.2					22	0	0
23	0	0	0	0	0	0	0	0	0	0	0	0	0			23	0	0	0	0	0.12744	0	0.360555	0.141421	0	0	0	0	0					23	0						23	0					23	0	0.212
24	0	0	0	0	0	0	0	0	0	0	0	0	0			24	0	0	0.316228	0	0.397	0	0.282843	0.509902	0	0	0	0	0					24	0						24	0					24	0.3	0
25	0	0	0	0	0	0	0	0	0	0	0	0	0			25	0	0	0	0	0.215037	0	0.67082	0.141421	0	0	0	0	0					25	0						25	0					25	0	0
26	0	0	0	0	0	0	0	0	0	0	0	0	0			26	0	0	0	0	0.592021	0	0.1	0.282843	0	0	0.3	0.141421	0					26	0						26	0					26	0	0
27	0	0	0	0	0	0	0	0	0	0	0	0	0			27	0	0	0	0	0.3	0	0.447214	0.316228	0	0	0	0	0					27	0						27	0					27	0	0
28	0	0	0	0	0	0	0	0	0	0	0	0	0			28	0	0	0	0	0	0	1.96977	0.141421	0	0	0	0.223607	0					28	0						28	0					28	0	0
29	0	0	0	0	0	0	0	0	0	0	0	0	0			29	0	0	0	0	0.1	0	0	0.223607	0.316228	0	0	0.223607	0					29	0						29	0					29	0.282843	0.106
30	0	0	0	0	0	0	0	0	0	0	0	0	0			30	0	0	0	0	0.339531	0	0.6	0.360555	0	0	0	0	0					30	0						30	0					30	0.141421	0.113177
31	0	0	0	0	0	0	0	0	0	0	0	0	0			31	0	0	0	0	0.25488	0	0.509902	0.1	0	0	0	0	0					31	0						31	0					31	0	0.1
32	0	0	0	0	0	0	0	0	0	0	0	0	0			32	0	0	0	0	0.1	0	0.583095	0.4	0	0	0	0	0					32	0						32	0					32	0	0
33	0	0	0	0	0	0	0	0	0	0	0	0	0			33	0	0	0	0	0.2	0	0.781025	0	0	0	0	0.572087	0					33	0						33	0					33	0	0
34	0	0	0	0	0	0	0	0	0	0	0	0	0			34	0.3	0	0	0.141421	0.258155	0	0.412311	0.1	0	0	0.1	0	0.05					34	0						34	0					34	0	0
35	0	0	0	0	0	0	0	0	0	0	0	0	0			35	1.40357	0	0	0.412311	0.159	0	1.61555	0	0	0	0	0.524672	0					35	0						35	0					35	0.223607	0
36	0	0	0	0	0	0	0	0	0	0	0	0	0			36	1.80278	0	0	0	0.159	0	0.948683	0.1	0	0	0	0.1	0					36	0						36	0					36	0.8	0
37	0	0	0	0	0	0	0	0	0	0	0	0	0			37	0.943398	0	0	0	0.2	0	0.5	0.223607	0	0	0	0.1	0					37	0						37	0					37	0.282843	0
38	0	0	0	0	0	0	0	0	0	0	0	0	0			38	0.728011	0	0	0	0.1	0	0.412311	0.3	0	0	0	0.2	0					38	0						38	0					38	0	0
39	0	0	0	0	0	0	0	0	0	0	0	0	0			39	0.728011	0	0	0	0.158	0	0.360555	0.223607	0	0	1.83848	0.602967	0.079					39	0						39	0.632456					39	0	0
40	0	0	0	0	0	0	0	0	0	0	0	0	0			40	3.38378	0	0	0	0.556	0	0.7	0.447214	0	0	0.894427	0.905539	0.223607					40	0						40	0.8					40	0	0
41	0	0	0	0	0	0	0	0	0	0	0	0	0			41	5.14198	0	0	0	0.553754	0	0.948683	0.223607	0	0	2	0.282843	0.111803					41	0						41	0.2					41	0	0
42	0	0	0	0	0	0	0	0	0	0	0	0	0			42	3.13847	0	0	0	0.317	0	0.223607	0.360555	0	0	0.412311	0.412311	0.111803					42	0						42	0.8					42	0	0
43	0	0	0	0	0	0	0	0	0	0	0	0	0			43	2.44131	0	0	0	0.128062	0.806226	0.2	0.1	0	0	0.3	0.640312	0.114031					43	0						43	0.948683					43	0	0.332002
44	0	0	0	0	0	0	0	0	0	0	0	0	0			44	2.26274	0	0	0	0.309974	0.1	0.360555	0.509902	0	0	0.5	0	0.05					44	0						44	0					44	0	0
45	0	0	0	0	0	0	0	0	0	0	0	0	0			45	0.921954	0	0	0	0.447214	0.848528	0.1	0.67082	0.412311	0	0	0	0.05					45	0						45	1.14018					45	0	0
46	0	0	0	0	0	0	0	0	0	0	0	0	0			46	0.608276	0	0.360555	0	0.526582	1.13137	0.2	0.1	0.4	0	0.4	0.707107	0.380278					46	0						46	0.4					46	0	0
47	0	0	0	0	0	0	0	0	0	0	0	0	0			47	0.447214	0	0.3	0	0.128062	0.538516	0.282843	0.583095	0.2	0	1.50333	0.360555	0.291421					47	0						47	0					47	0	0.113177
48	0	0	0	0	0	0	0	0	0	0	0	0	0			48	0	0.497603	0.608276	0	0.255501	0.360555	0.4	0	0.4	0	0.412311	0.2	0.308028					48	0						48	0.984886					48	0	0.211
49	0	0	0	0	0	0	0	0	0	0	0	0	0			49	0.538516	0.410078	0	0	0.079	0.360555	0.806226	0.1	0.824621	0	1.13137	0	0.230278					49	0						49	0.948683					49	0	0
50	0	0	0	0	0	0	0	0	0	0	0	0	0			50	0.447214	0.761577	0	0	0.238	1.52971	0.223607	0.316228	1.22066	0	1.253	0.2	0.277114					50	0						50	0.7					50	0	0
51	0	0	0	0	0	0	0	0	0	0	0	0	0			51	0.447214	0.848528	0	0	0.238	0	0.640312	0.72111	1.42127	0	2.41868	0.282843	0.365028					51	0						51	0.316228					51	0	0.304646
52	0	0	0	0	0	0	0	0	0	0	0	0	0			52	0.72111	1.52971	0	0	0.310483	0.3	0.1	1.28062	0.984886	0	1.20416	0.824621	0.515797					52	0						52	0.728011					52	0	0
53	0	0	0	0	0	0	0	0	0	0	0	0	0			53	1.66433	0.1	0.141421	0	0.1	0.424264	0	0.360555	0.5	0	1.14018	0.67082	0.250988					53	0						53	0					53	0	0
54	0	0	0	0	0	0	0	0	0	0	0	0	0			54	2.59615	0.4	0	0	0.128062	0.72111	0.223607	0.894427	1.34536	0	2.01246	0.2	0.311803					54	0						54	0					54	0	0
55	0	0	0	0	0	0	0	0	0	0	0	0	0			55	1.26491	0.282843	0	0	0.3	0.223607	0	0.608276	1.16619	0	1.06301	0.5	0.291421					55	0						55	0					55	0	0
56	0	0	0	0	0	0	0	0	0	0	0	0	0			56	1.4	0	0	0	0.50636	0.141421	0.2	0.583095	0.412311	0	0.1	0.1	0.120711					56	0						56	0.608276					56	0	0
57	0	0	0	0	0	0	0	0	0	0	0	0	0			57	1.42127	0	0	0	0.258155	0.583095	0	1.08167	1.55563	0	1.23693	1.43178	0.420625					57	0						57	0.223607					57	0	0
58	0	0	0	0	0	0	0	0	0	0	0	0	0			58	1.42127	1.20416	0.3	0	0.1	1.76918	0.3	1.41421	2.57099	0	0.223607	0.1	0.3					58	0						58	1.14018					58	0	0
59	0	0	0	0	0	0	0	0	0	0	0	0	0			59	0.632456	0.781025	0	0	0.258155	1.56205	0.1	3.04138	1.23693	0	0.707107	0.141421	0.445305					59	0						59	1.26491					59	0	0
60	0	0	0	0	0	0	0	0	0	0	0	0	0			60	1.67631	2.19545	0	0	0.318	0.316228	0	1.2	0.761577	0	1.7	0.538516	0.428258					60	0						60	0.316228					60	0	0
61	0	0	0	0	0	0	0	0	0	0	0	0	0			61	5.0636	1.78045	0	0	0.310876	0.141421	0	0.583095	0.3	0	4.06079	0.282843	0.291421					61	0						61	0.424264					61	0	0.053
62	0	1	0	0	0	0	0	0	0	0	0	1	2			62	4.80937	0.223607	0	0	0.08	1.23693	0.4	1.55242	45.024	0	0	0	0.151803					62	0						62	1.44222					62	0	0
63	0	0	0	0	0	0	0	0	0	0	0	0	0			63	1.253	0.565685	0	0	0.476	0.806226	0.316228	0	45.8074	0	1.10454	1.20416	0.520843					63	0						63	1.27279					63	0	0.106
64	0	1	0	0	0	0	0	0	0	0	0	1	2			64	1.31529	1	0	0	0.310483	0.360555	0.565685	1.3	0.4	0	1.14018	0.447214	0.423607					64	0						64	1.02956					64	0	0
65	1	1	0	0	0	0	0	0	0	0	1	1	4			65	2.10238	0.640312	0	0	0.238	1.02956	0.412311	0.4	0.5	0	2.61725	0.316228	0.406155					65	0						65	0.538516					65	0	0.106
66	1	0	0	0	0	0	0	0	0	0	1	0	2			66	4.12311	1.08167	0.1	0	0.128062	0.3	0.282843	0.360555	0.282843	0	0.412311	0	0.282843					66	0						66	0.894427					66	0	0
67	0	0	0	0	0	0	0	0	0	0	1	0	1			67	3.84708	0.5	0	0	0.238	0.860233	0.2	0.4	0	0	0.640312	0.316228	0.277114					67	0						67	0.447214					67	0	0.375665
68	0	0	0	0	0	0	0	0	0	0	1	0	1			68	3.04138	0.948683	0	0	0.258155	1.06301	1.6	0.2	0	0	0.67082	0	0.229077					68	0						68	0.538516					68	0	0.159
69	0	0	0	0	0	0	0	0	0	0	0	0	0			69	2.5318	0.4	0	0	0.590877	0.640312	0.316228	0.2	0	0	0.921954	0.360555	0.338391					69	0						69	0.4					69	0	0.113177
70	0	0	0	0	0	0	0	0	0	0	0	0	0			70	0.2	0.1	0.1	0	0.808223	0.894427	0	0.223607	0	0	0.583095	1.48661	0.15					70	0						70	1.04403					70	0	0.113177
71	0	1	0	0	0	0	0	0	0	0	0	1	2			71	3.10161	0.1	0	0	0.964823	0.67082	0	1	0	0.717831	0.3	0.1	0.2					71	0						71	0.565685					71	0	0
72	0	1	0	0	0	0	0	0	0	0	0	1	2			72	3.58469	0.424264	0	0	0.223607	0.282843	0	0.141421	0	0	0.424264	0	0.0707107					72	0						72	0.632456					72	0	0
73	0	1	0	0	0	0	0	0	0	0	0	1	2			73	2.30868	0.728011	0.1	0.141421	0.141421	0.223607	0.4	0.2	0	0	1	0.141421	0.170711					73	0						73	0.824621					73	0	0
74	0	0	0	0	0	0	0	0	0	0	0	0	0			74	0.728011	0	0	0	0.141421	0.943398	0.3	0.707107	0.6	0	1.26491	0.806226	0.45					74	0						74	0.316228					74	0	0
75	0	0	0	0	0	0	0	0	0	0	0	0	0			75	0.707107	0.316228	0	0	0.538516	1.14018	0.223607	0.8544	0.2	0	0.806226	1.07703	0.427372					75	0						75	0					75	0	0
76	0	0	0	0	0	0	0	0	0	0	0	0	0			76	0.989949	0.4	0	0	0.608276	1.56205	0.67082	0.1	0.3	0.4	0.5	0.6	0.45					76	0						76	1.3					76	0	0
77	0	0	0	0	0	0	0	0	0	0	0	0	0			77	0.1	0.447214	0	0	0.640312	1.02956	1.43178	2.35372	0.1	0	0.447214	0.4	0.423607					77	0						77	3.47131					77	0	0
78	0	0	0	0	0	0	0	0	0	0	0	0	0			78	0.943398	0	0	0	0.316228	1.7	0	2.87924	1.26491	0.12744	0.1	0.5	0.221834					78	0						78	1.55563					78	0.282843	0
79	0	0	0	0	0	0	0	0	0	0	0	0	0			79	1.23693	0.2	1.93132	0	0.141421	0.223607	0.282843	3.40588	0.360555	0	0.509902	0.141421	0.253225					79	0						79	0.141421					79	0.1	0
80	0	0	0	0	0	0	0	0	0	0	0	0	0			80	0.707107	0.2	0.360555	0	0.360555	0.72111	0.1	2.01246	1.31529	0	0.412311	1.2	0.386433					80	0						80	0					80	0	0
81	0	0	0	0	0	0	0	0	0	0	0	0	0			81	0.8544	0	0.412311	0	1.02956	0.316228	0.2	0.948683	0.72111	0	0	2.06155	0.364269					81	0						81	0.223607					81	0	0
82	0	0	0	0	0	0	0	0	0	0	0	0	0			82	0.509902	0.3	1.23693	0.2	0.761577	0.943398	2.40416	0.538516	0.632456	0	0.2	1.9105	0.585486					82	0						82	0.583095					82	0	0
83	0	0	0	0	0	0	0	0	0	0	0	0	0			83	1.65529	0	0.141421	0.1	0.360555	0.2	0.806226	0.860233	0.412311	0.128062	0	0	0.170711					83	0						83	0.412311					83	0	0.291452
84	0	0	0	0	0	0	0	0	0	0	1	0	1			84	0.781025	0.282843	0.223607	0.2	0.2	1.00499	0.3	2.02485	0.447214	0.1	0.316228	1.52643	0.308114					84	0						84	0.223607					84	0	0.1
85	0	0	0	0	0	0	0	0	0	0	1	0	1			85	0.282843	0.141421	0.2	0.4	0.5	0.7	1.52643	1.13137	0.4	0	1.22066	0.565685	0.45					85	0						85	0.3					85	0	0.053
86	0	0	0	0	0	0	0	0	0	0	0	0	0			86	0	2.54951	0.1	0.1	0.2	1.0198	0.2	0.4	0	0	5.26308	0	0.15					86	0						86	0.2					86	0	0.113177
87	0	0	0	0	0	0	0	0	0	0	0	0	0			87	0	0.447214	0	0.1	0.728011	0.223607	0.141421	1.64012	1	0	0.67082	0.948683	0.33541					87	0						87	0.3					87	0	0
88	0	0	0	0	0	0	0	0	0	0	0	0	0			88	0	0.141421	0.3	0.1	0.5	0.316228	0.1	0.860233	0.282843	0.128062	0	0	0.134742					88	0						88	1.20416					88	0	0
89	0	0	0	0	0	0	0	0	0	1	0	0	1			89	0	0.781025	1.5	0	0.447214	0.8544	0.223607	0.3	0.412311	2.10601	0.316228	0	0.364269					89	0						89	1.64924					89	0	0
90	0	0	0	0	0	1	0	0	0	1	0	0	2			90	1.2083	0.5	0.761577	0	0	0.412311	1.92354	0.223607	0.781025	0.317	0	0.412311	0.412311					90	0						90	2.28035					90	0	0
91	0	0	0	0	0	0	0	0	0	0	0	0	0			91	0.806226	0.943398	0.707107	0	0.316228	0.316228	1.86011	0.1	0.8544	1.26491	0	0.316228	0.511667					91	0						91	1.56205					91	0	0
92	0	0	0	0	0	0	0	0	0	0	0	0	0			92	0.1	0.424264	0.806226	0.728011	0.3	0.282843	3	1.02956	0	2.30868	0	0	0.362132					92	0						92	1.21655					92	0	0
93	0	0	0	0	0	0	0	0	0	0	0	0	0			93	0.1	0.4	0.141421	0.67082	0.4	0.6	2.46982	0.860233	0	0	0.1	0.640312	0.4					93	0						93	1.62788					93	0	0
94	1	0	0	0	0	1	1	0	0	0	0	0	3			94	0.806226	0.223607	0.4	0.509902	0.141421	0.728011	1.20416	0.447214	0	0.781025	0.640312	0.223607	0.478558					94	0						94	2.0025					94	0	0
95	1	0	0	0	0	1	1	0	0	0	0	0	3			95	0.824621	0.1	0	1.96469	0.3	0.424264	9.03549	0.67082	0.2	0.2	0.223607	0	0.261803					95	0						95	0.2					95	0	0
96	0	0	0	0	0	0	1	0	0	0	0	0	1			96	0	0.282843	0	0.316228	0.67082	0.223607	2.36008	0.412311	0.1	0.3	1.02956	0	0.291421					96	0						96	0.412311					96	0	0
97	0	0	0	1	0	0	0	0	0	0	0	0	1			97	1.06301	0.4	0	2.00998	0.1	0.9	1.2083	0.707107	0	0.5	0.3	0.538516	0.519258					97	0						97	0.728011					97	0	0
98	0	0	0	0	0	0	0	0	0	0	0	0	0			98	0.360555	0.223607	0	1.56525	0.223607	0.67082	0.761577	0.5	0	0.4	0.565685	0	0.380278					98	0						98	0.943398					98	0	0
99	0	0	0	0	0	0	0	0	0	0	0	0	0			99	0.447214	0	1.38924	1.36015	0.141421	0.5	1.2083	0.3	0	0.7	0.141421	0	0.373607					99	0						99	0.8544					99	0	0.105
100	0	0	0	0	0	0	0	0	0	0	0	0	0			100	0.282843	0	0	1.4	0.141421	0.608276	0.583095	0.5	0	0	0.223607	0	0.182514					100	0						100	1.34536					100	0	0
101	0	0	0	0	0	0	1	0	0	0	0	0	1			101	0.608276	0.1	0	0.67082	0.316228	0.538516	2.41868	0	0	0	1.14018	0.860233	0.427372					101	0						101	0.921954					101	0	0
102	1	0	0	0	0	1	1	1	0	0	0	0	4			102	0.806226	0	0	0.1	0.3	1.17047	1.2083	0	0	0	0.316228	1.00499	0.2					102	0						102	2.37065					102	0	0.053
103	1	0	0	0	1	1	1	0	0	0	0	0	4			103	1.47648	0	0.905539	0.67082	0.4	2.03961	1.81108	1.23693	0	0	0.2	2.06155	0.788179					103	0						103	1.0198					103	0	0
104	1	0	1	0	1	1	0	0	0	1	0	0	5			104	1.48661	2.10238	0.424264	3.50143	1.1	4.81664	1.71172	1.31529	1.87883	0.509902	0.360555	0.608276	1.40095					104	0						104	2.20227					104	0	0
105	0	0	1	0	0	0	0	1	0	0	0	0	2			105	1.16619	4.42717	0.360555	2.81603	0.538516	2.37697	0.707107	2.50799	0.943398	0.447214	0.3	1.14018	1.04179					105	0						105	2.48395					105	0	0
106	1	0	1	0	0	1	0	1	1	1	0	0	6			106	1.56525	1.3327	0.583095	0.583095	0.5	1.98494	0.72111	1.96469	3.1	0.316228	0.728011	0.1	0.724561					106	1						106	2.26716					106	0	0
107	0	0	0	0	0	0	0	1	1	0	0	0	2			107	1.4	0	3.1305	0.3	0.223607	0.632456	1.11803	8.2	1.3	1.26491	0.5	2.63059	1.19147					107	1						107	0.412311					107	0	0
108	0	0	0	0	0	0	0	1	1	0	0	0	2			108	1.65529	0.238	1	0	0.223607	1.62788	1.34536	0.5	0	0.360555	0.316228	1.40357	0.430278					108	1						108	0.565685					108	0	0
109	0	0	0	0	0	0	0	1	1	0	0	0	2			109	0.3	0.524672	0.282843	0	0.412311	1.31529	0.5	0.860233	0	0	0.316228	0.538516	0.364269					109	1						109	0.282843					109	0	0
110	0	0	0	0	0	0	1	1	0	0	0	0	2			110	0.1	0.1	0	1.08167	0.538516	2.78029	0.943398	0.72111	1.14018	1.0198	0.223607	0.4	0.629813					110	0						110	0.640312					110	0	0
111	0	0	0	0	0	0	1	1	0	0	0	0	2			111	1.61245	0	0.5	0.8	0.141421	1.34536	0.824621	0.223607	1.00499	0.412311	0.565685	0.4	0.532843					111	1						111	0.943398					111	0	0
112	1	0	0	0	0	1	0	1	1	0	0	0	4			112	0.316228	0.382941	0	0.67082	1.14018	0.728011	0.583095	0.5	0.5	0.632456	0.316228	0	0.5					112	1						112	0.282843					112	0	0
113	1	0	0	0	0	1	0	1	0	0	0	0	3			113	0.707107	0	0	0.5	0.316228	1.02956	1.21655	1.16619	1.40357	0	0.3	0.360555	0.430278					113	1						113	0.824621					113	0	0.145726
114	0	0	0	0	0	0	0	1	0	0	0	0	1			114	0	0.128062	0.223607	0.3	0	0.509902	0.1	0.538516	0.282843	0	0.141421	1.0198	0.182514					114	0						114	0.360555					114	0.141421	0.1
115	0	0	0	0	0	0	1	1	0	0	0	0	2			115	0	0.5	1.02956	0.141421	0.223607	0.223607	0.8	0.824621	1.34164	0	0.141421	0	0.223607					115	0						115	0.538516					115	0	0
116	0	0	0	0	0	0	0	0	0	0	0	0	0			116	0	1.12886	0.728011	0	0	1.16619	0.447214	0.316228	0.707107	0	0.223607	1	0.381721					116	0						116	0					116	0	0
117	0	0	0	0	0	0	0	0	0	0	0	0	0			117	0.2	0.444532	0.8544	0	0.1	0.4	1.47648	0.141421	0.5	0.282843	0	0.72111	0.341421					117	0						117	0					117	0	0
118	0	0	0	0	0	0	0	0	0	0	0	0	0			118	0.565685	0	0.509902	0	0.223607	0.509902	0.707107	0	0.5	0.781025	0.424264	0	0.462132					118	0						118	0.1					118	0	0.28324
119	0	0	0	0	0	0	0	0	0	0	0	0	0			119	0.67082	0	0.632456	0	0.3	0.2	0.316228	0.2	0	0.640312	0.316228	0	0.25					119	0						119	0					119	0	0
120	0	0	0	0	0	0	0	1	0	0	0	0	1			120	0.6	0	0	0	0.316228	2.41661	0.761577	0.5	0.5	0.9	0.223607	0.3	0.408114					120	0						120	0					120	0	0
121	0	0	0	0	0	0	0	1	0	0	0	0	1			121	0.5	0.511003	0.8	0	0.223607	1.62788	0	1.40357	1.78885	0.989949	0.5	0.223607	0.505501					121	0						121	0					121	0	0
122	0	0	0	0	0	0	0	0	0	0	0	0	0			122	1.02956	0.159	0.806226	0	0.141421	2.60768	0.5	0.806226	0.640312	0.3	0.67082	0	0.570156					122	0						122	0.921954					122	0	0
123	0	0	0	0	0	0	0	0	0	0	0	0	0			123	0	1.0512	0	0	0.1	0.565685	1.56525	1.14018	0.1	0	0.6	0.447214	0.273607					123	0						123	1.7088					123	0	1.09882
124	0	0	0	0	0	0	0	1	0	0	0	0	1			124	0.5	0.255501	0.316228	0	0.2	2.16333	3.80526	1.08167	0.905539	0.223607	0.4	0.316228	0.358114					124	0						124	0.5					124	0	0
125	0	0	0	0	0	0	0	1	0	0	0	0	1			125	0.608276	0	0	0	0.1	0.3	2.23607	0.360555	0.316228	0.141421	0.2	0.2	0.2					125	0						125	0.5					125	0	0
126	0	0	0	0	0	0	0	0	0	0	0	0	0			126	0.3	0	0	0	0.141421	1.253	0.989949	0	1.50333	0	0.141421	0.8544	0.141421					126	0						126	0.3					126	0.848528	0
127	0	0	0	0	0	0	0	0	0	0	0	0	0			127	0.223607	0	0	0	0.509902	1.20416	1.61555	0	0.1	0	0.2	5.14296	0.15					127	0						127	0.1					127	0.2	0
128	0	0	0	0	0	0	0	0	0	0	0	0	0			128	0	0	0	0	0.2	0.447214	0.948683	0	0.360555	0.424264	0.2	0.67082	0.2					128	0						128	0.2					128	0	0
129	0	0	0	0	0	0	0	0	0	0	0	0	0			129	0	0	0	0	0.5	0.921954	2.86007	0	0.1	0	0.1	0.282843	0.05					129	0						129	0.223607					129	0	0
130	0	0	0	0	0	0	0	0	0	0	0	0	0			130	0	0.408431	0	0	0.141421	1.08167	1.0198	0	0.509902	0.141421	0.2	0.761577	0.170711					130	0						130	0.10123					130	0.67082	0
131	0	0	0	0	0	0	0	0	0	0	0	0	0			131	0	0	0	0	0.316228	2.45967	1.55242	0	0.509902	0.1	0.412311	0.3	0.2					131	0						131	0					131	0.2	0
132	0	0	0	0	0	0	0	0	0	0	0	0	0			132	0	0	0	0	0.223607	3.08058	1	0	0.141421	0	0.141421	0.360555	0.0707107					132	0						132	0					132	0	0
133	0	0	0	0	0	0	0	0	0	0	0	0	0			133	0	0	0	0	0.447214	1.3	0.3	0	0	0	0.2	0.728011	0					133	0						133	0					133	0	0.265
134	0	0	0	0	0	0	0	0	0	0	0	0	0			134	0	0	0	0	0.141421	1.48661	0.360555	0	0	0	0.5	0.424264	0					134	0						134	0.143161					134	0	0
135	0	0	0	0	0	0	0	0	0	0	0	0	0			135	0	0	0	0	0.316228	0.223607	0.316228	0	0	0	0.2	0.1	0					135	0						135	0					135	0.1	0
136	0	0	0	0	0	0	0	0	0	0	0	0	0			136	0.1	0.128062	0	0	0.1	0	0	0	0	0	0.223607	0	0					136	0						136	0.417382					136	0.1	0
137	0	0	0	0	0	0	0	0	0	0	0	0	0			137	0.1	0	0	0.360555	0	0.141421	0	0	0	0	0.141421	0.1	0					137	0						137	0					137	0	0
138	0	0	0	0	0	0	0	0	0	0	0	0	0			138	0.1	0	0	0	0.316228	0.5	0.412311	0	0	0	0	0	0					138	0						138	0.10123					138	0.282843	0
139	0	0	0	0	0	0	0	0	0	0	0	0	0			139	0.2	0.382941	0	0	0.1	0.316228	0.5	0	0	0	0.412311	0.412311	0.15					139	0						139	0.417382					139	0.2	0
140	0	0	0	0	0	0	0	0	0	0	0	0	0			140	0.2	0.1	0	0	0.447214	0.447214	1.00499	0	0	0	0.223607	0.67082	0.15					140	0						140	0					140	0.316228	0
141	0	0	0	0	0	0	0	0	0	0	0	0	0			141	0	0	0	0	0.223607	0.2	0.141421	0	0	0	0.72111	0.141421	0					141	0						141	0					141	0.223607	0
142	0	0	0	0	0	0	0	0	0	0	0	0	0			142	0.223607	0	0	0	0.4	0.223607	0	0.1	0.282843	0	0.223607	0.608276	0.161803					142	0						142	0					142	0	0
143	0	0	0	0	0	0	0	0	0	0	0	0	0			143	0	0	0	0	0.4	0.316228	0	0	0.1	0	0.2	0	0					143	0						143	0					143	0	0
144	0	0	0	0	0	0	0	0	0	0	0	0	0			144	0	0	0	0	0.141421	0	0.447214	0	0	0	0.141421	0	0					144	0						144	0					144	0	0
145	0	0	0	0	0	0	0	0	0	0	0	0	0			145	0	0	0	0	0.360555	0.447214	0.141421	0	0	0.4	0.223607	0	0					145	0						145	0					145	0	0
146	0	0	0	0	0	0	0	0	0	0	0	0	0			146	0.1	0	0	0.3	0.412311	0.1	0.1	0	0	0.7	0.1	0.2	0.1					146	0						146	0					146	0	0
147	0	0	0	0	0	0	0	0	0	0	0	0	0			147	0	0.318	0	0	0.223607	0.223607	0.1	0	0	0.1	0.3	0.905539	0.1					147	0						147	0					147	0	0
148	0	0	0	0	0	0	0	0	0	0	0	0	0			148	0	0.332399	0	0.412311	0.2	0.141421	0.1	0	0	0	0.141421	1.0198	0.120711					148	0						148	0					148	0	0
149	0	0	0	0	0	0	0	0	0	0	0	0	0			149	0	0.562651	0	0	0.223607	0.5	0	0	0	0.223607	0.72111	0.583095	0.111803					149	0						149	0					149	0	0
150	0	0	0	0	0	0	0	0	0	0	0	0	0			150	0	0.563568	0	0	0.282843	0.4	0.1	0	0	0	0.360555	0.6	0.05					150	0						150	0					150	0	0
151	0	0	0	0	0	0	0	0	0	0	0	0	0			151	0	0.258155	0	0	0.223607	0.8	0.141421	0	0	0.1	0.316228	0.1	0.1					151	0						151	0					151	0	0
152	0	0	0	0	0	0	0	0	0	0	0	0	0			152	0	0	0	0	0.141421	0.282843	0	0	0	0	0.2	1.99249	0					152	0						152	0					152	0.3	0
153	0	0	0	0	0	0	0	0	0	0	0	0	0			153	0	0	0	0	0.223607	0.1	0.1	0	0	0	0.2	0.141421	0					153	0						153	0					153	0	0
154	0	0	0	0	0	0	0	0	0	0	0	0	0			154	0	0	0	0	0	0.2	0.1	0	0	0	0.223607	2.43516	0					154	0						154	0					154	0	0
155	0	0	0	0	0	0	0	0	0	0	0	0	0			155	0	0	0	0	0.640312	0.282843	0	0	0	0.1	0.1	0.72111	0					155	0						155	0					155	0.1	0
156	0	0	0	0	0	0	0	0	0	0	0	0	0			156	0	0	0	0	0.223607	0.424264	0.5	0	0	0.1	0.2	0.1	0.05					156	0						156	0					156	0	0
157	0	0	0	0	0	0	0	0	0	0	0	0	0			157	0	0	0	0	0.316228	0.223607	0.7	0	0	0	0.1	0	0					157	0						157	0					157	0	0
158	0	0	0	0	0	0	0	0	0	0	0	0	0			158	0	0	0	0	0.412311	0.1	0.5	0	0	0	0.1	0	0					158	0						158	0					158	0	0
159	0	0	0	0	0	0	0	0	0	0	0	0	0			159	0	0	0	0.2	0.141421	0.360555	0.4	0	0	0	0	0	0					159	0						159	0					159	0	0
160	0	0	0	0	0	0	0	0	0	0	0	0	0			160	0	0	0	0	0.1	0.640312	0	0	0	0	0.3	0.4	0					160	0						160	0					160	0	0
161	0	0	0	0	0	0	0	0	0	0	0	0	0			161	0	0.339531	0	0	0.223607	0.1	0	0	0	0	0.223607	0.5	0					161	0						161	0					161	0	0
162	0	0	0	0	0	0	0	0	0	0	0	0	0			162	0	0.589936	0	0	0.3	0.1	0	0	0	0	0.360555	0.921954	0					162	0						162	0					162	0	0
163	0	0	0	0	0	0	0	0	0	0	0	0	0			163	0.2	0	0	0	0.282843	0.4	0.223607	0	0	0	0.223607	0.5	0.1					163	0						163	0					163	0	0
164	0	0	0	0	0	0	0	0	0	0	0	0	0			164	0	0.079	0	0	0.1	0.5	0.2	0	0	0	0.223607	1.08167	0.0395					164	0						164	0					164	0	0
165	0	0	0	0	0	0	0	0	0	0	0	0	0			165	0	0.08	0	0	0.1	0.824621	0	0	0.1	0	0.223607	1.30384	0.04					165	0						165	0					165	0	0
166	0	0	0	0	0	0	0	0	0	0	0	0	0			166	0	0	0	0	0.3	0.316228	0	0.2	0	0	0.1	0.72111	0					166	0						166	0					166	0	0
167	0	0	0	0	0	0	0	0	0	0	0	0	0			167	0	0	0	0	0.4	0.3	0.1	0	0.141421	0	0	0.72111	0					167	0						167	0					167	0	0
168	0	0	0	0	0	0	0	0	0	0	0	0	0			168	0	0	0	0.1	0	0.67082	0	0	0	0.1	0	0.5	0					168	0						168	0					168	0	0
169	0	0	0	0	0	0	0	0	0	0	0	0	0			169	0	0	0	0	0	1.28062	0.316228	0	0	0	0.2	1.52643	0					169	0						169	0					169	0	0
170	0	0	0	0	0	0	0	0	0	0	0	0	0			170	0	0.128062	0	0	0.1	0.412311	0.1	0	0	0	0.1	0.6	0.05					170	0						170	0					170	0	0
171	0	0	0	0	0	0	0	0	0	0	0	0	0			171	0	0.159	0	0	0.3	0.1	0	0	0	0	0.1	1.10454	0					171	0						171	0					171	0	0.159
172	0	0	0	0	0	0	0	0	0	0	0	0	0			172	0	0	0	0	0	0.447214	0	0	0	0.1	0.1	0.921954	0					172	0						172	0					172	0	0
173	0	0	0	0	0	0	0	0	0	0	0	0	0			173	0	0.12744	0	0	0.282843	0.412311	0.141421	0	0	0	0.1	0	0					173	0						173	0					173	0.1	0
174	0	0	0	0	0	0	0	0	0	0	0	0	0			174	0	0	0	0	0.1	0.424264	0	0	0	0.1	0.2	0	0					174	0						174	0					174	0.1	0
175	0	0	0	0	0	0	0	0	0	0	0	0	0			175	0	0	0	0	0.3	0.1	0.316228	0	0	0	0.4	0	0					175	0						175	0					175	0	0
176	0	0	0	0	0	0	0	0	0	0	0	0	0			176	0	0	0	0	0	0.1	0.1	0	0	0	0.2	0.316228	0					176	0						176	0					176	0	0
177	0	0	0	0	0	0	0	0	0	0	0	0	0			177	0	0	0	0	0.2	0.223607	0.1	0	0	0	0.223607	0	0					177	0						177	0					177	0	0
178	0	0	0	0	0	0	0	0	0	0	0	0	0			178	0	0	0	0	0.3	0.1	0.1	0	0	0	0.223607	0.948683	0					178	0						178	0					178	0	0
179	0	0	0	0	0	0	0	0	0	0	0	0	0			179	0	0	0	0	0.360555	0.1	0.424264	0	0	0	0.223607	0.360555	0					179	0						179	0					179	0	0
180	0	0	0	0	0	0	0	0	0	0	0	0	0			180																		180	0						180	0					180
[truncated: 35 more columns]

## Sheet: Sheet 5
Sheet 5.		Parameters of mass spawning event in S. intermedius 16 September of 2015, in Kievka Bay
		Blue raws denote the beginning and the end of spawning in males, red raws denote the beginning and the end of spawning in females. The cells with figure "1" highlited by green color denote the presence of gamete clots on the aboral surface of males and females.
		Male spawning events								Step length of males, cm								Female spawning events								Step length of females, cm						Step length of nonspawners, cm								Distance from males to the center of mass of females, cm								Distance from nonspawners to the center of mass of females, cm
	Time, min	Male-1	Male-2	Male-3	Dynamics of male spawning				Time, min	Male-1	Male-2	Male-3	Median step length				Time, min	Female-1							Time, min	Female-1					Time, min	Nonsp-4	Nonsp-5	Nonsp-6	Nonsp-7	Median step length			Time, min	Male-1	Male-2	Male-3	Median					Time, min	Nonsp-4
	0	0	0	0	0				0								0	0							0						0								0	12.8082	25.768	26.0432	25.768					0	15.5926
	1	0	0	0	0				1	0	0.360555	0	0.120185				1	0							1	0					1	1.74642	0.2	0	0.223607	0.211803			1	12.8082	25.4382	26.0432	25.4382					1	13.9521
	2	0	0	0	0				2	0.316228	0.249401	0.583095	0.382908				2	0							2	0.509902					2	3.4	0	0	0.2	0.1			2	12.9711	25.3548	26.5505	25.3548					2	11.7456
	3	0	0	0	0				3	0.5	0.308992	0.360555	0.389849				3	0							3	0					3	1.43178	0.447214	0	0.223607	0.33541			3	12.478	25.1356	26.9072	25.1356					3	10.5418
	4	0	0	0	0				4	0.632456	0	0.141421	0.257959				4	0							4	0.141421					4	1.40357	0	0	0.3	0.15			4	11.7712	25.1022	26.7739	25.1022					4	9.58019
	5	0	0	0	0				5	0	0	0.707107	0.235702				5	0							5	0.141421					5	1.99249	0.1	0	0.608276	0.354138			5	11.887	24.9647	26.3181	24.9647					5	8.01311
	6	0	0	0	0				6	0	0	0	0				6	0							6	0.3					6	1.43178	0.1	0	0.781025	0.440512			6	11.9436	24.7092	26.1	24.7092					6	6.7624
	7	0	0	0	0				7	0	0.074	0	0.0246667				7	0							7	0.282843					7	0.141421	0.223607	0	0.1	0.120711			7	11.7903	24.6066	25.8172	24.6066					7	6.46607
	8	0	0	0	0				8	0.5	0	0	0.166667				8	0							8	0.7					8	1.93132	0.360555	0	0.1	0.230278			8	12.4455	24.0178	25.3148	24.0178					8	7.76209
	9	0	0	0	0				9	0.5	0	0.223607	0.241202				9	0							9	0.424264					9	0.8544	0	0	0.3	0.15			9	12.3976	23.9345	25.1024	23.9345					9	8.16088
	10	0	0	0	0				10	0	0	0.1	0.0333333				10	0							10	0					10	0.223607	0.2	0	1.00499	0.211803			10	12.3976	23.9345	25.173	23.9345					10	8.36002
	11	0	0	0	0				11	0	0	0.509902	0.169967				11	0							11	1.3					11	1.4	0.141421	0	0.3	0.220711			11	12.0304	25.0206	25.6759	25.0206					11	10.245
	12	0	0	0	0				12	0	0	0	0				12	0							12	0.412311					12	2.6	0.316228	0	0.67082	0.493524			12	11.6662	25.1543	25.3286	25.1543					12	11.6778
	13	0	0	0	0				13	0	0	0.2	0.0666667				13	0							13	0.282843					13	3.82099	0.2	0	0.412311	0.306155			13	11.5248	25.099	24.9002	24.9002					13	14.2172
	14	0	0	0	0				14	0	0	0.282843	0.0942809				14	0							14	0					14	4.2	0	0	0	0			14	11.5248	25.099	24.9098	24.9098					14	17.9513
	15	0	0	0	0				15	0.1	0	0.728011	0.276004				15	0							15	0					15	3.29848	0	0	0.141421	0.0707107			15	11.6211	25.099	25.5619	25.099					15	21.2078
	16	0	0	0	0				16	2.6	0	0.1	0.9				16	0							16	0.447214					16	0.806226	0.1	0	0.2	0.15			16	13.9043	25.3215	25.9268	25.3215					16	21.7849
	17	0	0	0	0				17	1.20416	0	0.4	0.53472				17	0							17	0.1					17	0.2	0	0	0.894427	0.1			17	15.0748	25.4053	25.7031	25.4053					17	21.6474
	18	0	0	0	0				18	0.67082	0	0.5	0.390273				18	0							18	0.2					18	0.583095	0	0	0.1	0.05			18	15.4467	25.5149	25.6737	25.5149					18	21.4245
	19	0	0	0	0				19	0.707107	0	0.141421	0.282843				19	0							19	0					19	0.223607	0.1	0	0.608276	0.161803			19	14.7411	25.5149	25.8147	25.5149					19	21.2438
	20	0	0	0	0				20	0.3	0	0.316228	0.205409				20	0							20	0.1					20	0.223607	0.3	0	0.1	0.161803			20	14.6219	25.5701	25.4796	25.4796					20	20.9313
	21	0	0	0	0				21	0.5	0.15	2.05913	0.903042				21	0							21	0.447214					21	0.360555	0.1	0	0.4	0.230278			21	14.6578	25.1016	26.36	25.1016					21	21.5112
	22	0	0	0	0				22	0	0	0	0				22	0							22	0					22	0.72111	0	0	0.141421	0.0707107			22	14.6578	25.1016	26.36	25.1016					22	22.2272
	23	0	0	0	0				23	0	0	0	0				23	0							23	0.141421					23	0	0	0	0.6	0			23	14.7489	25.1318	26.5	25.1318					23	22.3618
	24	0	0	0	0				24	0	0	0	0				24	0							24	0					24	0.3	0	0.3	0.3	0.3			24	14.7489	25.1318	26.5	25.1318					24	22.6292
	25	0	0	0	0				25	0.447214	0	0	0.149071				25	0							25	0					25	0.2	0	0	0.3	0.1			25	14.9215	25.1318	26.5	25.1318					25	22.4508
	26	0	0	0	0				26	0.1	0	0.223607	0.107869				26	0							26	0.509902					26	0.447214	0	0	0.282843	0.141421			26	15.5158	24.9522	27.1017	24.9522					26	22.6773
	27	0	0	0	0				27	0.538516	0	0.1	0.212839				27	0							27	0.5					27	0.223607	0	0	0.2	0.1			27	16.1078	24.4885	27.1901	24.4885					27	23.0764
	28	0	0	0	0				28	0.640312	0	0.1	0.246771				28	0							28	0.1					28	0.761577	0	0	0.1	0.05			28	16.5003	24.4028	27.1901	24.4028					28	23.0887
	29	0	0	0	0				29	0.223607	0	0.3	0.174536				29	0							29	0.141421					29	0.583095	0.728011	0.3	0.141421	0.441548			29	16.2028	24.3691	26.8643	24.3691					29	22.4537
	30	0	0	0	0				30	0	0	0	0				30	0							30	0					30	0.3	0.538516	0	0.3	0.3			30	16.2028	24.3691	26.8643	24.3691					30	22.72
	31	0	0	0	0				31	1	0	0.1	0.366667				31	0							31	0.316228					31	0.223607	0.141421	0	0.2	0.170711			31	16.7012	24.442	26.6627	24.442					31	22.54
	32	0	0	0	0				32	2.72029	0	0.282843	1.00105				32	0							32	0.141421					32	0.223607	0	0.1	0.538516	0.161803			32	18.3709	24.5799	26.9615	24.5799					32	22.3652
	33	0	0	0	0				33	2.7313	0.1	0	0.943767				33	0							33	0					33	0.424264	0	0	0.223607	0.111803			33	17.816	24.6646	26.9615	24.6646					33	22.2428
	34	0	0	0	0				34	3.80132	0	0	1.26711				34	0							34	0.360555					34	0.3	0	0.1	0.4	0.2			34	16.9956	24.3042	26.8472	24.3042					34	22.1382
	35	0	0	0	0				35	3.18277	0	0	1.06092				35	0							35	0					35	0.360555	0	0.3	0.1	0.2			35	16.2432	24.3042	26.8472	24.3042					35	22.3161
	36	0	0	0	0				36	2.66271	0	0.360555	1.00775				36	0							36	0					36	0.141421	0	0.1	0.1	0.1			36	15.64	24.3042	26.7372	24.3042					36	22.2713
	37	0	0	0	0				37	0.72111	0	0	0.24037				37	0							37	0					37	0.509902	0	0	0.860233	0.254951			37	15.5438	24.3042	26.7372	24.3042					37	21.78
	38	0	0	0	0				38	0	0	0	0				38	0							38	0					38	0.806226	0	0	0.447214	0.223607			38	15.5438	24.3042	26.7372	24.3042					38	22.232
	39	0	0	0	0				39	0.360555	0	0.3	0.220185				39	0							39	0					39	0.447214	0	0.447214	0.1	0.273607			39	15.8902	24.3042	26.9713	24.3042					39	22.6791
	40	0	0	0	0				40	0.7	0	0.424264	0.374755				40	0							40	0					40	0.948683	0	0	0	0			40	16.3527	24.3042	27.0224	24.3042					40	22.0036
	41	0	0	0	0				41	0.282843	0	0	0.0942809				41	0							41	3.19061					41	0.7	0	0	0.5	0.25			41	13.2774	24.5046	24.0527	24.0527					41	19.4589
	42	0	0	0	0				42	1.00499	0	0.316228	0.440405				42	0							42	0.781025					42	0.2	0	0	0.894427	0.1			42	12.5877	25.2856	24.0741	24.0741					42	19.1003
	43	0	0	0	0				43	0.282843	0	0	0.0942809				43	0							43	1.48661					43	0.806226	0	0	0.4	0.2			43	12.245	26.5734	23.7539	23.7539					43	17.427
	44	0	0	0	0				44	0.412311	0	0.1	0.17077				44	0							44	1.52643					44	0.707107	0	0	0.509902	0.254951			44	12.6143	28.0351	23.8816	23.8816					44	16.2828
	45	0	0	0	0				45	1.20416	0	0	0.401386				45	0							45	4.02492					45	0.3	0.4	0	0.316228	0.308114			45	12.6905	31.818	24.1961	24.1961					45	14.8499
	46	0	0	0	0				46	0.4	0	0	0.133333				46	0							46	1.45602					46	0.538516	0	0	0.412311	0.206155			46	12.468	33.0953	24.2052	24.2052					46	14.7272
	47	0	0	0	0				47	0.1	0	0	0.0333333				47	0							47	0.921954					47	0.4	0.6	0	0.1	0.25			47	12.5064	33.8848	24.2012	24.2012					47	14.5801
	48	0	0	0	0				48	3.23883	0	0	1.07961				48	0							48	0					48	0.640312	0	0	0.4	0.2			48	12.5284	33.8848	24.2012	24.2012					48	14.6168
	49	0	0	0	0				49	0.2	0	0	0.0666667				49	0							49	0.223607					49	0.424264	0	0	0.412311	0.206155			49	12.8845	34.0947	24.3772	24.3772					49	15.1433
	50	0	0	0	0				50	1.86011	0	0	0.620036				50	0							50	0.3					50	0.728011	0	0	0.781025	0.364005			50	12.2385	34.3135	24.32	24.32					50	14.2836
	51	0	0	0	0				51	0.447214	0.2	0	0.215738				51	0							51	1.82483					51	0.1	0	0	0.1	0.05			51	13.1548	32.9491	24.4264	24.4264					51	15.198
	52	0	0	0	0				52	0.1	0.225	0.1	0.141667				52	0							52	0.8544					52	0.3	0	0	0.565685	0.15			52	13.783	33.5717	25.224	25.224					52	15.8808
	53	0	0	0	0				53	0.4	0.224	0	0.208				53	0							53	1.43178					53	0.316228	0	0	0.1	0.05			53	14.1824	32.0871	24.99	24.99					53	16.5194
	54	0	0	0	0				54	0.424264	0.406971	0.3	0.377078				54	0							54	0.282843					54	0.583095	0	0	0.640312	0.291548			54	13.8405	31.7368	24.8284	24.8284					54	16.8122
	55	0	0	0	0				55	0.640312	0.180278	0.1	0.306863				55	0							55	3.54683					55	0.2	0	0	0.4	0.1			55	13.4807	28.2401	23.7065	23.7065					55	17.3046
	56	0	0	0	0				56	0.360555	0.124403	0.1	0.194986				56	0							56	3.00832					56	0.223607	0	0	0.509902	0.111803			56	12.4776	25.6091	21.5745	21.5745					56	16.5061
	57	0	0	0	0				57	0.316228	0.179446	0	0.165225				57	0							57	1.44222					57	1.16619	0	0	0.447214	0.223607			57	12.1264	26.8556	21.691	21.691					57	14.8354
	58	0	0	0	0				58	5.02195	6.37817	0	3.80004				58	0							58	2.69072					58	0.538516	0.141421	0	0.640312	0.339969			58	13.2095	19.2519	20.8849	19.2519					58	15.6
	59	0	0	0	0				59	2.34094	0.8	0.1	1.08031				59	1							59	0.447214					59	0.223607	0.1	0	0.1	0.1			59	12.8876	18.402	21.006	18.402					59	16.0627
	60	0	0	0	0				60	2.02485	0.783758	0	0.936201				60	0							60	1.70294					60	0.412311	0	0	0.141421	0.0707107			60	13.366	16.4147	20.6526	16.4147					60	16.8885
	61	0	0	0	0				61	0.8	5.47596	0	2.09199				61	1							61	1.70294					61	0.538516	0.2	0	0.3	0.25			61	13.1061	13.0465	19.3145	13.1061					61	16.6628
	62	0	0	0	0				62	0.424264	2.54951	0	0.991258				62	1							62	1.20416					62	0.2	0	0	0.316228	0.1			62	13.0392	12.6301	18.5284	13.0392					62	16.7194
	63	0	1	0	1				63	0.781025	6.0208	0	2.26727				63	0							63	2.41868					63	0.447214	0	0	0.6	0.223607			63	13.1605	7.69675	17.1817	13.1605					63	17.2003
	64	0	1	0	1				64	0.360555	2.80179	1.33417	1.49884				64	0							64	0.282843					64	0.3	0	0	0.2	0.1			64	12.7487	9.32363	15.8937	12.7487					64	17.0012
	65	0	0	0	0				65	0	0.509902	1.14018	0.550026				65	0							65	0.72111					65	1.14018	0	0.447214	0.565685	0.50645			65	12.5591	9.66075	14.151	12.5591					65	16.3689
	66	0	0	0	0				66	0.2	3.90512	3.17805	2.42772				66	1							66	0.67082					66	0.608276	0	0	0.4	0.2			66	12.1433	6.36003	11.3455	11.3455					66	16.1697
	67	0	1	0	1				67	0	3.67696	1.20416	1.62704				67	1							67	0.223607					67	0.905539	0	0	0.565685	0.282843			67	12.1758	6.42806	10.6066	10.6066					67	16.105
	68	0	0	0	0				68	0.921954	2.11896	0.943398	1.3281				68	0							68	0.707107					68	0.8	0	0.1	0.4	0.25			68	12.0208	5.91354	11.1288	11.1288					68	16.311
	69	0	0	0	0				69	0.806226	1.83576	0.72111	1.12103				69	0							69	0.781025					69	0.6	1.61245	0	0.8	0.7			69	13.1469	4.87955	11.2045	11.2045					69	16.7147
	70	0	0	0	0				70	0.5	7.15681	0.447214	2.70134				70	0							70	1.14018					70	0.2	0.608276	0	0.781025	0.404138			70	11.5209	5.23546	11.0345	11.0345					70	15.6013
	71	0	0	0	0				71	0.316228	0.565685	0.1	0.327304				71	0							71	0.509902					71	0.728011	0	0	0.67082	0.33541			71	12.2577	5.48179	11.3846	11.3846					71	16.311
	72	0	0	0	0				72	0.538516	2.45967	0.8	1.26606				72	0							72	1.02956					72	1.02956	0.1	0	0.8	0.45			72	11.6662	4.55412	9.83107	9.83107					72	15.3118
	73	0	1	1	2				73	1.80278	1.92354	1.39284	1.70638				73	0							73	1.23693					73	1.83576	0	0	0.583095	0.291548			73	11.1005	6.72681	9.89949	9.89949					73	14.5041
	74	0	1	1	2				74	0.640312	3.1257	1.62788	1.79796				74	1							74	0.565685					74	1.97231	0.141421	0	0.5	0.320711			74	11.0368	7.71751	8.83912	8.83912					74	14.5774
	75	0	0	1	1				75	0	0.447214	0.806226	0.417813				75	1							75	0					75	1.67631	0.1	0.728011	0.6	0.664005			75	11.0368	7.34302	8.2134	8.2134					75	15.9063
	76	0	1	0	1				76	0.509902	1.39284	1.62788	1.17687				76	1							76	0.608276					76	0.316228	0.1	0.223607	0.2	0.211803			76	11.0454	8.08022	10.3247	10.3247					76	16.3982
	77	0	1	1	2				77	0.5	1.83576	0.6	0.978585				77	1							77	0					77	2.00998	0	0.72111	0.316228	0.518669			77	10.6231	7.51665	9.91564	9.91564					77	14.47
	78	1	0	0	1				78	0	2.70185	0.824621	1.17549				78	1							78	0					78	0.72111	0.4	0.3	0.2	0.35			78	10.6231	8.4309	9.24554	9.24554					78	15.1796
	79	0	1	0	1				79	0.728011	0.4	0.632456	0.586822				79	1							79	0					79	0.984886	0.1	0	0.2	0.15			79	11.3111	8.28734	8.65563	8.65563					79	14.4669
	80	0	1	0	1				80	0.72111	2.90689	0.632456	1.42015				80	1							80	0					80	1.30384	0.3	0	0.1	0.2			80	11.9004	7.31095	8.12158	8.12158					80	15.6541
	81	0	1	1	2				81	1.34536	3.5805	1.10454	2.01013				81	0							81	0.4					81	0.6	0.806226	0	0.447214	0.523607			81	12.4326	7.47329	7.24017	7.47329					81	15.8433
	82	1	1	1	3				82	1	1.61555	1.14018	1.25191				82	0							82	0.5					82	1.56525	0.141421	0	0.282843	0.212132			82	11.2	9.07579	7.14213	9.07579					82	14.0118
	83	0	0	1	1				83	0.316228	0.72111	0.943398	0.660245				83	0							83	0					83	0.632456	0	0	0.447214	0.223607			83	11.1041	9.28924	8.06598	9.28924					83	13.5192
	84	0	0	1	1				84	0.728011	0.360555	0.141421	0.409996				84	0							84	0					84	0.412311	0	0	0	0			84	10.9458	9.02441	7.92465	9.02441					84	13.8578
	85	0	0	1	1				85	0.583095	0.640312	1.74642	0.989944				85	0							85	0					85	0.316228	0.223607	0	0.4	0.269917			85	10.4809	9.32148	9.5901	9.5901					85	13.8514
	86	0	0	1	1				86	0.509902	0.316228	0	0.275377				86	0							86	0.1					86	0.608276	0.424264	0.1	0	0.262132			86	10.4738	9.10824	9.66747	9.66747					86	14.0014
	87	0	1	1	2				87	0.141421	0.360555	0.72111	0.407696				87	0							87	0					87	0.360555	0	0	0.4	0.180278			87	10.5546	8.86848	9.76217	9.76217					87	13.6488
	88	0	1	0	1				88	0.824621	0.67082	1.84391	1.11312				88	0							88	0					88	0.223607	0.282843	0	0.412311	0.253225			88	10.6471	8.51469	10.9041	10.6471					88	13.6704
	89	0	0	0	0				89	0.316228	1.2	0.565685	0.693971				89	0							89	0					89	0.921954	0.2	0	0.1	0.15			89	10.9371	9.71288	10.8231	10.8231					89	13.8293
	90	0	1	1	2				90	0.632456	0.6	2.01246	1.08164				90	0							90	0.538516					90	0.5	0	0.412311	0.3	0.356155			90	11.082	10.8042	13.3222	11.082					90	14.4475
	91	0	0	1	1				91	0.538516	1.08167	0.1	0.573394				91	0							91	0.1					91	0.5	0	0.223607	0.4	0.311803			91	10.728	10.2591	13.4402	10.728					91	14.7733
	92	0	0	1	1				92	0.806226	0	0.424264	0.410163				92	0							92	0					92	0.728011	0.3	0	0.223607	0.261803			92	9.92472	10.2591	13.86	10.2591					92	15.2977
	93	0	0	0	0				93	0.141421	0	0	0.0471405				93	0							93	1.30384					93	0.1	0.3	0	0.67082	0.2			93	11.1005	10.3019	14.7513	11.1005					93	16.5218
	94	0	0	0	0				94	0	0.3	0.6	0.3				94	0							94	0					94	0.72111	1.11803	0	0	0.360555			94	11.1005	10.3121	15.2118	11.1005					94	16.483
	95	0	0	0	0				95	0	0	0.316228	0.105409				95	0							95	0					95	0.6	0.6	0	0	0.3			95	11.1005	10.3121	15.3838	11.1005					95	16.1744
	96	0	0	0	0				96	0.1	0	0	0.0333333				96	0							96	0.640312					96	0.9	0.5	0	0.6	0.55			96	10.5224	9.9	14.7611	10.5224					96	16.3294
	97	0	0	0	0				97	0.282843	0.424264	0.1	0.269036				97	0							97	0.316228					97	0.316228	0.223607	0	0.608276	0.269917			97	10.9041	9.90202	15.14	10.9041					97	16.2496
	98	0	0	0	0				98	0	0.3	0	0.1				98	0							98	0					98	0.3	0	0	0.412311	0.15			98	10.9041	9.91262	15.14	10.9041					98	15.9881
	99	0	0	0	0				99	0.6	0	0.6	0.4				99	0							99	0					99	0.316228	0	0	0.1	0.05			99	10.8046	9.91262	14.6649	10.8046					99	16.2985
	100	0	0	0	0				100	0	0.223607	0.2	0.141202				100	0							100	0					100	0.583095	1.00499	0	0.8	0.691548			100	10.8046	9.70824	14.5417	10.8046					100	16.3248
	101	0	0	0	0				101	0	0	0.1	0.0333333				101	0							101	0					101	0.3	0.72111	0	0.2	0.25			101	10.8046	9.70824	14.6031	10.8046					101	16.059
	102	0	0	0	0				102	0	0.424264	0	0.141421				102	0							102	0.1					102	0.316228	0.1	0	0.360555	0.208114			102	10.7912	9.30054	14.5245	10.7912					102	15.7943
	103	0	0	0	0				103	0	0	0	0				103	0							103	0					103	0.608276	0.5	0	0.1	0.3			103	10.7912	9.30054	14.5245	10.7912					103	16.1744
	104	0	0	0	0				104	0	0.1	0	0.0333333				104	0							104	0					104	0.2	0	0	0.72111	0.1			104	10.7912	9.20054	14.5245	10.7912					104	16.0751
	105	0	0	0	0				105	0	0	0	0				105	0							105	0					105	0.223607	0	0	0.2	0.1			105	10.7912	9.20054	14.5245	10.7912					105	16.2012
	106	0	0	0	0				106	0	0.424264	0	0.141421				106	0							106	0.1					106	0.943398	0	0	0.6	0.3			106	10.8904	8.90505	14.5866	10.8904					106	16.2604
	107	0	0	0	0				107	0	0	0.728011	0.24267				107	0							107	0					107	0.360555	0	0	0.640312	0.180278			107	10.8904	8.90505	15.0207	10.8904					107	16.2754
	108	0	0	0	0				108	0	0	0	0				108	0							108	0.447214					108	0.509902	0	0	1.38924	0.254951			108	11.3137	9.10055	15.4201	11.3137					108	16.3857
	109	0	0	0	0				109	0	0.1	0	0.0333333				109	0							109	0.360555					109	0.1	0	0	0.2	0.05			109	11.5572	9.40213	15.7801	11.5572					109	16.7574
	110	0	0	0	0				110	0	0.538516	0	0.179505				110	0							110	0					110	0.412311	0.316228	0	0.4	0.358114			110	11.5572	8.9	15.7801	11.5572					110	17.0558
	111	0	0	0	0				111	0	0.141421	0	0.0471405				111	0							111	0.640312					111	0.509902	0	0	0.316228	0.158114			111	11.0887	8.31505	15.14	11.0887					111	16.3233
	112	0	0	0	0				112	0.509902	0.223607	0	0.244503				112	0							112	0.728011					112	1.253	0	0	0.583095	0.291548			112	10.9238	8.91403	15.8218	10.9238					112	15.7877
	113	0	0	0	0				113	0	0.3	0	0.1				113	0							113	0					113	0.860233	0	0	0.2	0.1			113	10.9238	8.93588	15.8218	10.9238					113	16.5484
	114	0	0	0	0				114	0	1.33417	0	0.444722				114	0							114	0					114	0.3	0	0	0.3	0.15			114	10.9238	8.85268	15.8218	10.9238					114	16.6883
	115	0	0	0	0				115	0	2.23607	0	0.745356				115	0							115	0					115	0.2	0.223607	0	0.360555	0.211803			115	10.9238	8.63539	15.8218	10.9238					115	16.8648
	116	0	0	0	0				116	0	2.78568	0.5	1.09523				116	0							116	0					116	0.707107	0	0	0.5	0.25			116	10.9238	9.40479	15.4201	10.9238					116	17.0857
	117	0	0	0	0				117	0	3.32415	0	1.10805				117	0							117	0.316228					117	0.1	0	0	0.5	0.05			117	10.9659	10.959	15.2434	10.9659					117	17.1397
	118	0	0	0	0				118	0	1.92354	0	0.641179				118	0							118	0					118	0.1	0	0	1	0.05			118	10.9659	12.7953	15.2434	12.7953					118	17.2308
	119	0	0	0	0				119	0	0.223607	0	0.0745356				119	0							119	0					119	0.447214	0.2	0	0.6	0.323607			119	10.9659	12.9711	15.2434	12.9711					119	17.6777
	120	0	0	0	0				120	0	0.640312	0	0.213437				120	0							120	0					120	0.3	0	0	0.632456	0.15			120	10.9659	13.5956	15.2434	13.5956					120	17.5559
	121	0	0	0	0				121	0	0.316228	0.2	0.172076				121	0							121	0					121	0.781025	0	0	0.2	0.1			121	10.9659	13.6418	15.3675	13.6418					121	17.3528
	122	0	0	0	0				122	0	0.141421	0.3	0.14714				122	0							122	0					122	0.5	0.1	0	0.2	0.15			122	10.9659	13.7768	15.6029	13.7768					122	17.8037
	123	0	0	0	0				123	0	0.5	0	0.166667				123	0							123	0					123	0.3	0	0	0.282843	0.141421			123	10.9659	14.2215	15.6029	14.2215					123	17.5328
	124	0	0	0	0				124	0	0.316228	0.1	0.138743				124	0							124	0					124	0.1	0	0	0.2	0.05			124	10.9659	13.9086	15.6646	13.9086					124	17.4428
	125	0	0	0	0				125	0	0.905539	0	0.301846				125	0							125	0					125	0.509902	0	0	0.447214	0.223607			125	10.9659	14.2524	15.6646	14.2524					125	17.9368
	126	0	0	0	0				126	0	0.282843	0	0.0942809				126	0							126	0					126	0.1	0	0	0.6	0.05			126	10.9659	14.1834	15.6646	14.1834					126	17.8941
	127	0	0	0	0				127	0.223607	1.04403	0.3	0.522546				127	0							127	0					127	0.3	0	0	0.4	0.15			127	11.1803	14.4845	15.9013	14.4845					127	17.7688
	128	0	0	0	0				128	0.1	0.316228	0	0.138743				128	0							128	0					128	0.316228	0.1	0	0.4	0.208114			128	11.2787	14.3951	15.9013	14.3951					128	17.9847
	129	0	0	0	0				129	0	0.360555	0.509902	0.290152				129	0							129	0					129	0.1	0.3	0	0.4	0.2			129	11.2787	14.3962	15.4457	14.3962					129	18.0272
	130	0	0	0	0				130	0	0.1	0.223607	0.107869				130	0							130	0					130	0.4	0	0	0.4	0.2			130	11.2787	14.3122	15.4013	14.3122					130	17.6664
	131	0	0	0	0				131	0	0.509902	0.1	0.203301				131	0							131	0					131	0.2	0	0.1	0.3	0.15			131	11.2787	14.5086	15.3405	14.5086					131	17.7544
	132	0	0	0	0				132	0.1	0.1	0.1	0.1				132	0							132	0					132	0.948683	0	0	0.4	0.2			132	11.3772	14.5661	15.2801	14.5661					132	18.4358
	133	0	0	0	0				133	0.640312	0.3	0	0.313437				133	0							133	0					133	0.707107	0	0	0.3	0.15			133	11.8089	14.8122	15.2801	14.8122					133	17.7589
	134	0	0	0	0				134	0	0.1	0	0.0333333				134	0							134	0					134	0.2	0	0	1.00499	0.1			134	11.8089	14.8946	15.2801	14.8946					134	17.5824
	135	0	0	0	0				135	0	0	0	0				135	0							135	0					135	0.412311	0	0	0.4	0.2			135	11.8089	14.8946	15.2801	14.8946					135	17.3081
	136	0	0	0	0				136	0	0	0	0				136	0							136	0					136	0.4	0	0	0.8	0.2			136	11.8089	14.8946	15.2801	14.8946					136	17.6649
	137	0	0	0	0				137	0	0	0	0				137	0							137	0					137	0.2	0	0	0.4	0.1			137	11.8089	14.8946	15.2801	14.8946					137	17.7553
	138	0	0	0	0				138	0	1.14018	0	0.380058				138	0							138	0					138	0.1	0.412311	0	0.1	0.1			138	11.8089	15.9841	15.2801	15.2801					138	17.8011
	139	0	0	0	0				139	0	0.328	0.360555	0.229518				139	0							139	0					139	0.1	0	0.1	0.424264	0.1			139	11.8089	16.2519	15.4029	15.4029					139	17.8474
	140	0	0	0	0				140	0.1	0.45	0.141421	0.230474				140	0							140	0					140	0.1	0	0	0.632456	0.05			140	11.908	16.623	15.2634	15.2634					140	17.8941
	141	0	0	0	0				141	0	0.899724	0.509902	0.469875				141	0							141	0					141	0.509902	0	0	0.4	0.2			141	11.908	16.9837	14.8003	14.8003					141	18.0472
	142	0	0	0	0				142	0	0	0	0				142	0							142	0					142	0.1	0	0	0.608276	0.05			142	11.908	16.9837	14.8003	14.8003					142	17.9981
	143	0	0	0	0				143	0.707107	0.125	0	0.277369				143	0							143	0.316228					143	0.3	0	0	0.4	0.15			143	11.7712	16.6641	14.9013	14.9013					143	17.9494
	144	0	0	0	0				144	0	0.1	0	0.0333333				144	0							144	0					144	0.316228	0	0	0.7	0.158114			144	11.7712	16.7171	14.9013	14.9013					144	18.2603
	145	0	0	0	0				145	0	0.309233	0	0.103078				145	0							145	0.2					145	0.860233	0.316228	0.1	1.38924	0.58823			145	11.9683	16.6488	15.0243	15.0243					145	18.5607
	146	0	0	0	0				146	0.509902	0.224	0	0.244634				146	0							146	0					146	0.1	0	0.2	0.921954	0.15			146	11.4935	16.4626	15.0243	15.0243					146	18.6507
	147	0	0	0	0				147	0	0	0	0				147	0							147	0					147	0.141421	0	0.223607	0.989949	0.182514			147	11.4935	16.4626	15.0243	15.0243					147	18.6979
	148	0	0	0	0				148	0	0	0.412311	0.137437				148	0							148	0					148	0.1	0	0.223607	0.509902	0.161803			148	11.4935	16.4626	14.6492	14.6492					148	18.7883
	149	0	0	0	0				149	0	0	0	0				149	0							149	0					149	0.360555	0	0.583095	0.4	0.380278			149	11.4935	16.4626	14.6492	14.6492					149	18.8449
	150	0	0	0	0				150	0	0	0.282843	0.0942809				150	0							150	0					150	0.707107	0	0	0.3	0.15			150	11.4935	16.4626	14.368	14.368					150	18.186
	151	0	0	0	0				151	0	0.1	0	0.0333333				151	0							151	0					151	0.223607	0	0	0.894427	0.111803			151	11.4935	16.4069	14.368	14.368					151	18.3576
	152	0	0	0	0				152	0.223607	0.603801	0	0.275803				152	0							152	0					152	0.447214	0	0	0.728011	0.223607			152	11.5572	16.6853	14.368	14.368					152	18.8043
	153	0	0	0	0				153	0	1.09522	0	0.365073				153	0							153	0					153	0.2	0	0	0.4	0.1			153	11.5572	16.933	14.368	14.368					153	18.6215
	154	0	0	0	0				154	0	1.78794	0	0.59598				154	0							154	0					154	0.223607	0	0	0.223607	0.111803			154	11.5572	17.1745	14.368	14.368					154	18.8449
	155	0	0	0	0				155	0.1	1.2076	0.316228	0.541277				155	0							155	0					155	0.2	0	0	0.4	0.1			155	11.4586	17.9428	14.072	14.072					155	19.0276
	156	0	0	0	0				156	0	0.3	0	0.1				156	0							156	0.3					156	0.1	0	0	0.6	0.05			156	11.5122	17.9428	14.3056	14.3056					156	19.2419
	157	0	0	0	0				157	0.4	0	0.1	0.166667				157	0							157	0					157	0.509902	0	0	0.412311	0.206155			157	11.1198	17.9428	14.2436	14.2436					157	18.8311
	158	0	0	0	0				158	0	0	0	0				158	0							158	0.538516					158	0.2	0	0	0.316228	0.1			158	11.0354	18.3006	14.5207	14.5207					158	19.0515
	159	0	0	0	0				159	0.141421	0	0.412311	0.184577				159	0							159	0					159	0.509902	0	0	0.316228	0.158114			159	11.1571	18.3006	14.7872	14.7872					159	18.5607
	160	0	0	0	0				160	0	0.618224	0	0.206075				160	0							160	0					160	0	0	0	0.316228	0			160	11.1571	17.9584	14.7872	14.7872					160	18.5607
	161	0	0	0	0				161	0	0	0	0				161	0							161	0.1					161	0.223607	0	0	0.2	0.1			161	11.1826	17.9909	14.8691	14.8691					161	18.7387
	162	0	0	0	0				162	0	0.4	0	0.133333				162	0							162	0.1					162	0.640312	0	0	0.316228	0.158114			162	11.2089	17.8948	14.9513	14.9513					162	18.1571
	163	0	0	0	0				163	0	0.2	0	0.0666667				163	0							163	0.3					163	0.360555	0	0	0.3	0.15			163	11.4983	17.5475	15.1238	15.1238					163	18.7387
	164	0	0	0	0				164	0	0	0	0				164	0							164	0					164	0.223607	0	0	0.223607	0.111803			164	11.4983	17.5475	15.1238	15.1238					164	18.919
	165	0	0	0	0				165	0	0	0.316228	0.105409				165	0							165	0					165	0	0	0	0.5	0			165	11.4983	17.5475	14.8219	14.8219					165	18.919
	166	0	0	0	0				166	0	0	0	0				166	0							166	0.3					166	0.3	0	0	0.728011	0.15			166	11.7881	17.2624	15	15					166	19.0518
	167	0	0	0	0				167	0.2	0.1	0	0.1				167	0							167	0.1					167	0.360555	0	0	0.4	0.180278			167	11.6914	17.1991	15.0602	15.0602					167	18.7843
	168	0	0	0	0				168	0.2	0	0	0.0666667				168	0							168	0.360555					168	0.360555	0	0	0.447214	0.180278			168	11.772	17.1091	15.4201	15.4201					168	19.4538
	169	0	0	0	0				169	0	0	0	0				169	0							169	0					169	0.447214	0.2	0	0.565685	0.323607			169	11.772	17.1091	15.4201	15.4201					169	19.1888
	170	0	0	0	0				170	0	0.1	0	0.0333333				170	0							170	0					170	0.1	0	0	0.4	0.05			170	11.772	17.1433	15.4201	15.4201					170	19.1426
	171	0	0	0	0				171	0.3	0	0	0.1				171	0							171	0.141421					171	0.806226	0	0	0.2	0.1			171	11.609	17.0843	15.5602	15.5602					171	18.5238
	172	0	0	0	0				172	0	0	0.3	0.1				172	0							172	0.223607					172	0.5	0.761577	0	0	0.25			172	11.7644	17.0623	15.6013	15.6013					172	19.1471
	173	0	0	0	0				173	0	0	0.894427	0.298142				173	0							173	0					173	0.1	0.223607	0	0.3	0.161803			173	11.7644	17.0623	14.8122	14.8122					173	19.2354
	174	0	0	0	0				174	0	0	0.141421	0.0471405				174	0							174	0					174	0.1	0.282843	0	0.6	0.191421			174	11.7644	17.0623	14.6731	14.6731					174	19.3238
	175	0	0	0	0				175	0	0	0	0				175	0							175	0					175	0.3	0.1	0.1	0.5	0.2			175	11.7644	17.0623	14.6731	14.6731					175	19.0589
	176	0	0	0	0				176	0	0	0.4	0.133333				176	0							176	0					176	0.316228	0.412311	0.5	0.424264	0.418287			176	11.7644	17.0623	14.4506	14.4506					176	19.3706
	177	0	0	0	0				177	0	0	0.3	0.1				177	0							177	0					177	0.141421	0.3	0	0.141421	0.141421			177	11.7644	17.0623	14.2888	14.2888					177	19.3298
	178	0	0	0	0				178	0	0	0.4	0.133333				178	0							178	0.1					178	0.223607	0.360555	0	0.360555	0.292081			178	11.7953	17.0989	14.1662	14.1662					178	19.251
	179	0	0	0	0				179								179	0							179						179								179									179
[truncated: 4 more columns]

## Sheet: Sheet 6
Sheet 6.		Parameters of mass spawning event in S. intermedius 17 May of 2016, in Alekseev Bay
		Blue raws denote the beginning and the end of spawning in males, red raws denote the beginning and the end of spawning in females. The cells with figure "1" highlited by green color denote the presence of gamete clots on the aboral surface of males and females.
	Male spawning events											Step length of males, cm										Step length of nonspawners, cm
Time, min	Male-1	Male-2	Male-3	Male-5	Male-6	Male-7	Dynamics of male spawning				Time, min	Male-1	Male-2	Male-3	Male-5	Male-6	Male-7	Median step length			Time, min	Nonsp-10	Nonsp-11	Nonsp-12	Nonsp-13	Nonsp-14	Nonsp-4	Nonsp-8	Nonsp-9	Median step length
1	0	0	0	0	0	0	0				1										1
2	0	0	0	0	0	0	0				2	0.3	0.3	0	1.13137	0.316228	0.632456	0.308114			2	0.2	0.1	0.3	0	0	0.3	0	0.1	0.125
3	0	0	0	0	0	0	0				3	0.2	0.316228	0	0.824621	0	0.282843	0.241421			3	0.2	0.5	3.68782	0	0.5	0	0.6	0.12037	0.701024
4	0	0	0	0	0	0	0				4	0.583095	0.1	0	0.565685	0	0.447214	0.273607			4	0.3	0.3	2.08087	0	0.6	0.1	0.509902	0.066	0.494596
5	0	0	0	0	0	0	0				5	0.316228	0.509902	0	0	0	0.447214	0.158114			5	0.223607	0.948683	0.6	0	0.360555	0.1	0.1	0	0.291606
6	0	0	0	0	0	0	0				6	0.360555	0.223607	0	0	0	0.538516	0.111803			6	0.4	0.4	0	0	1.11803	0.223607	0.1	0.2	0.305205
7	0	0	0	0	0	0	0				7	0.2	0.223607	0	0	0	0.282843	0.1			7	0.4	0.3	0.6	0	0.6	0.223607	0.2	0	0.290451
8	0	0	0	0	0	0	0				8	0.360555	0.1	0	0	0	0.538516	0.05			8	0.223607	0	0	0	0.141421	0.223607	0.2	0	0.0985794
9	0	0	0	0	0	0	0				9	0.223607	0.583095	0	0.1	0	0.509902	0.161803			9	0.141421	0	0	0	0	0.141421	0.282843	0	0.0707107
10	0	0	0	0	0	0	0				10	0.1	0.141421	0.8	0.608276	0	0.141421	0.141421			10	0.141421	0	0.2	0	0	0.1	0	0	0.0551777
11	0	0	0	0	0	0	0				11	0.316228	0.1	0.141421	0.2	0	0	0.120711			11	0.2	0	0	0	0	0	0.2	0	0.05
12	0	0	0	0	0	0	0				12	0.1	0.141421	0.2	0.2	0.2	0	0.170711			12	0.223607	0.2	0	0	0	0.282843	0.360555	0	0.133376
13	0	0	0	0	0	0	0				13	0	0.316228	0	0.2	0	0	0			13	0.223607	0	0	0.1	0	0.316228	0.316228	0	0.119508
14	0	0	0	0	0	0	0				14	0	0.3	0	0	0.2	0	0			14	0.141421	0	0.1	0.223607	0.316228	0.1	0.2	0	0.135157
15	0	0	0	0	0	0	0				15	0	0.989949	0.223607	0.2	0	0	0.1			15	0.141421	0.316228	0	0	0	0.223607	0.282843	0	0.120512
16	0	0	0	0	0	0	0				16	0	0.538516	0	0.2	0	0	0			16	0.2	0.608276	0	0	0.316228	0.1	0.141421	0	0.170741
17	0	0	0	0	0	0	0				17	0.223607	0.2	0.72111	0	0	0	0.1			17	0.3	0.223607	0	0	0.223607	0.3	0.141421	0	0.148579
18	0	0	0	0	0	0	0				18	0.3	0.447214	0.2	0	0	0	0.1			18	0.2	0.282843	0	0	0.223607	0.282843	0.2	0	0.148662
19	0	0	0	0	0	0	0				19	0	0.2	0.141421	0.1	0	0	0.05			19	0.1	0.509902	0	0	0.447214	0.1	0.223607	0	0.17259
20	0	0	0	0	0	0	0				20	0.141421	0.3	0	0.1	0	0	0.05			20	0.223607	0.316228	0	0	0.1	0.1	0	0	0.0924793
21	0	0	0	0	0	0	0				21	1.02956	0.141421	0	0	0	0	0			21	0.6	0	0	0	0.141421	0.141421	0.2	0	0.135355
22	0	0	0	0	0	0	0				22	0.3	0.2	0.141421	0	0	0	0.0707107			22	0.3	0.141421	0	0	0.3	0.2	0.447214	0	0.173579
23	0	0	0	0	0	0	0				23	0.7	0.141421	0	0	0	0	0			23	0.2	0.1	0	0	0	0.1	0.2	0	0.075
24	0	0	0	0	0	0	0				24	0.509902	0.1	0	0.1	0	0	0.05			24	0.360555	0.632456	0	0	0	0.141421	0	0	0.141804
25	0	0	0	0	0	0	0				25	0	0	0	0	0	0	0			25	0.2	0.223607	0	0	0	0.1	0.412311	0	0.11699
26	0	0	0	0	0	0	0				26	0.583095	0.141421	0	0.141421	0	0	0.0707107			26	0	0.223607	0	0	0	0.141421	0.223607	0	0.0735794
27	0	0	0	0	0	0	0				27	0.316228	0.1	0	0.1	0	0	0.05			27	0.6	0	0	0	0.141421	0.2	0.1	0	0.130178
28	0	0	0	0	0	0	0				28	0.608276	0.3	0	0.223607	0	0	0.111803			28	0.1	0.824621	0	0	0	0.1	0.1	0	0.140578
29	0	0	0	0	0	0	0				29	0.3	0.2	0.2	0	0	0	0.1			29	0.2	0	0	0	0	0.223607	0.282843	0	0.0883062
30	0	0	0	0	0	0	0				30	0.565685	0.2	0	0.223607	0	0	0.1			30	0.1	0	0	0	0	0.223607	0.223607	0	0.0684017
31	0	0	0	0	0	0	0				31	0.223607	0.2	0	0.1	0	0	0.05			31	0.223607	0	0	0	0	0	0.141421	0	0.0456285
32	0	0	0	0	0	0	0				32	0	0.1	0	0	0	0	0			32	0.1	0.316228	0	0	0	0.1	0.1	0	0.0770285
33	0	0	0	0	0	0	0				33	0	0.6	0	0.1	0	0	0			33	0	0.2	0	0	0	0.141421	0.1	0	0.0551777
34	0	0	0	0	0	0	0				34	0	0.282843	0	0.1	0	0	0			34	0	0	0	0	0	0.223607	0.316228	0	0.0674793
35	0	0	0	0	0	0	0				35	0	0.1	0	0.1	0	0	0			35	0	0	0	0	0	0.1	0.2	0	0.0375
36	0	0	0	0	0	0	0				36	0	0.7	0	0	0	0	0			36	0.1	0.1	0	0.1	0	0	0.538516	0.067	0.11319
37	0	0	0	0	0	0	0				37	0	0.1	0	0	0	0	0			37	0.1	0	0	0	0	0.2	0.2	0	0.0625
38	0	0	0	0	0	0	0				38	0	0.781025	0.223607	0	0	0	0			38	0	0.1	0	0	0.538516	0	0.316228	0	0.119343
39	0	0	0	0	0	0	0				39	0	0.5	0	0.2	0	0	0			39	0.1	0.1	0	0	0.316228	0.223607	0.223607	0	0.12043
40	0	0	0	0	0	0	0				40	0	0.1	0.1	0	0	0	0			40	0	0.141421	0.3	0	0.316228	0.316228	0.1	0.223607	0.174685
41	0	0	0	0	0	0	0				41	0	0.72111	0.412311	0.5	0	0	0.206155			41	0	0.141421	0	0	0	0	0.1	0.210924	0.0565432
42	0	0	0	0	0	0	0				42	0.412311	0.412311	0	0.565685	0	0	0.206155			42	0.1	0.2	0	0	0.1	0.316228	0	0.067	0.0979035
43	0	0	0	0	0	0	0				43	0	0.5	0	0.3	0	0	0			43	0.2	0	0.1	0	0.1	0.316228	0	0.201	0.114653
44	0	0	0	0	0	0	0				44	0	0.1	0	0.1	0	0	0			44	0.3	0	0.1	0	0.1	0.282843	0.2	0	0.122855
45	0	0	0	0	0	0	0				45	0.538516	0.6	0	0	0	0	0			45	0.223607	0	0	0	0	0.2	0.1	0	0.0654508
46	0	0	0	0	0	0	0				46	0.5	0.538516	0.316228	0.447214	0	0	0.381721			46	0.141421	0	0.447214	0	0.223607	0	0.1	0	0.11403
47	0	0	0	0	0	0	0				47	0.447214	0.412311	0	0.424264	0	0	0.206155			47	0.1	0	0.4	0	0	0.509902	0.1	0	0.138738
48	0	0	0	0	0	0	0				48	0.8544	0.282843	0.2	0	0	0	0.1			48	0.141421	0.2	0.1	0	0.2	0.1	0.223607	0	0.120629
49	0	0	0	0	0	0	0				49	0.316228	0.316228	0.2	0.223607	0	0	0.211803			49	0.1	0.223607	0.1	0	0	0	0.1	0	0.0654508
50	0	0	0	0	0	0	0				50	0.316228	0.141421	0.1	0.223607	0	0	0.120711			50	0.1	0.1	0.640312	0	0	0.223607	0.316228	0	0.172518
51	0	0	0	0	0	0	0				51	0.447214	0.282843	0.3	0	0	0	0.141421			51	0.1	0.1	0	0	0	0.223607	0.316228	0	0.0924793
52	0	0	0	0	0	0	0				52	0	1.36015	0	0.223607	0	0	0			52	0.223607	0.141421	0	0	0	0.1	0.282843	0	0.0934839
53	0	0	0	0	0	0	0				53	0.2	0.707107	0	0.412311	0	0	0.1			53	0.316228	0	0	0	0	0.1	0.1	0.504337	0.127571
54	0	0	0	0	0	0	0				54	0.412311	0.223607	0	0	0.2	0	0.1			54	0.1	0.4	0	0	0	0	0.316228	0.2	0.127028
55	0	0	0	0	0	0	0				55	0	0.5	0	0.360555	0	0	0			55	0.141421	0	0	0	0.5	0.360555	0.316228	0.521752	0.229995
56	0	0	0	0	0	0	0				56	0.141421	0.447214	0	0.447214	0.3	0.282843	0.291421			56	0	0.360555	0	0	0	0	0.3	0.1664	0.103369
57	0	0	0	0	0	0	0				57	0	0	0	0.447214	0	0	0			57	0.2	0	0.141421	0	0.223607	0.141421	0	0.210924	0.114672
58	0	0	0	0	0	0	0				58	0	1.30384	0	1.43178	0	0	0			58	0	0	0	0	0.1	0.141421	0	0	0.0301777
59	0	0	0	0	0	0	0				59	0.141421	1.21655	0	1.34164	0	0	0.0707107			59	0.141421	0	0	0	0.223607	0.1	0.2	0	0.0831285
60	0	0	0	0	0	0	0				60	0.2	1.11803	0.1	0.223607	0	0	0.15			60	0.1	0	0	0.316228	0.1	0.141421	0.2	0	0.107206
61	0	0	0	0	0	0	0				61	0.5	0.6	0	0.1	0	0	0.05			61	0.1	0	0	0	0.1	0.1	0.1	0	0.05
62	0	0	0	0	0	0	0				62	0.223607	0.583095	0	1.51327	0	0	0.111803			62	0.1	0.1	0	0	0	0.1	0.2	0	0.0625
63	1	0	0	0	0	0	1				63	0	0.3	0	0.781025	0	0	0			63	0.2	0.2	0.1	0	0	0.3	0.141421	0.802718	0.218017
64	1	0	0	0	0	0	1				64	0.728011	0.141421	0	0	0.316228	0	0.0707107			64	0.360555	0	0	0	0	0.141421	0.1	0.836794	0.179846
65	1	0	0	0	0	0	1				65	0.2	0	0.360555	0.5	0.2	0	0.2			65	0.316228	0	0.1	0	0.412311	0	0.2	0.508944	0.192185
66	1	0	0	0	0	0	1				66	0.640312	0	0.424264	0.2	0.447214	0	0.312132			66	0.1	0	0.282843	0	0.2	0.1	0.2	0.348649	0.153936
67	1	0	0	1	0	0	2				67	0	0	0.223607	0	0.608276	0	0			67	0.707107	0.2	0	0	0.1	0.2	0.2	0.307391	0.214312
68	1	0	0	1	0	0	2				68	0.824621	0	0.565685	0.2	0.447214	0	0.323607			68	0.316228	0.223607	0.2	0	0	0.141421	0	0.224502	0.13822
69	1	0	1	1	1	0	4				69	0.1	0	0.5	0	0.5	0	0.05			69	0.3	0.1	0.509902	0	0	0.223607	0.360555	0.2	0.211758
70	1	0	1	1	1	0	4				70	0.412311	0	0.5	0.223607	0.316228	0	0.269917			70	0.447214	0.2	0.282843	0	0	0.360555	0.3	1.17081	0.345178
71	1	0	1	1	1	0	4				71	0.4	0	0.3	0.2	0.141421	0	0.170711			71	0.761577	0.360555	0.1	0	0	0.1	1.07703	0.601295	0.375058
72	1	0	1	1	1	0	4				72	0.2	0.447214	0	0	0.1	0	0.05			72	0.360555	0.608276	0.1	0	0	0.223607	0.894427	0	0.273358
73	1	0	1	1	0	0	3				73	0.1	0.316228	0	0.424264	0.282843	0	0.191421			73	0.6	0.412311	0.1	0	0	0.1	1.0198	0.2	0.304014
74	0	1	1	1	0	0	3				74	0.316228	0	0.1	0.509902	0.4	0	0.208114			74	0.3	0.2	0	0	0	0	0.412311	0	0.114039
75	0	1	1	1	0	0	3				75	0.1	0	0.412311	0	0.806226	0	0.05			75	0.806226	0.424264	0	0	0	0.223607	1.08167	0	0.31697
76	0	1	1	1	0	0	3				76	0.2	0	0.223607	0.223607	0.2	0	0.2			76	0.447214	0.4	0	0.316228	0	0.1	0.921954	0.067	0.281549
77	0	1	1	0	0	0	2				77	0.141421	0	0.538516	0	1.34536	0	0.0707107			77	0	0.707107	0	0.8544	0.223607	0.3	0.5	0	0.323139
78	0	1	1	1	0	0	3				78	0.4	0	0.412311	0.2	1	0	0.3			78	0.2	0.5	0	0.316228	0	0.583095	0.447214	0.067	0.264192
79	0	1	1	1	1	0	4				79	0.2	0.3	0.4	1.28062	0.360555	0	0.330278			79	0.316228	0.1	0	0	0	0.360555	0.6	0	0.172098
80	1	1	1	1	1	0	5				80	0.447214	0.447214	0.728011	0.2	0.141421	0	0.323607			80	0.360555	0.4	0.1	0	0.1	0.223607	0.4	0	0.19802
81	1	1	1	1	0	0	4				81	0.223607	0.1	0.223607	1.20416	0.223607	0	0.223607			81	0.424264	0.1	0.1	0	0.2	0.223607	0.223607	0.134	0.175685
82	1	1	1	1	0	0	4				82	0.316228	0	0.141421	0.3	0.223607	0	0.182514			82	0.538516	0.1	0.223607	0	0.1	0.1	0.223607	0.421848	0.213447
83	1	1	1	1	0	0	4				83	0.223607	0.447214	0	0.984886	0.360555	0	0.292081			83	0.1	0	0	0	0.282843	0.2	0.316228	0.282843	0.147739
84	0	1	1	1	0	0	3				84	0.1	0.223607	1.55563	0.806226	0	0	0.161803			84	0.1	0	0	0	0	0.1	0.316228	0.544266	0.132562
85	0	1	1	1	0	0	3				85	0.141421	0.1	0.5	0.1	0	0	0.1			85	0.412311	0	0	0	0	0.2	0.412311	0.389302	0.17674
86	0	1	1	1	0	0	3				86	0.223607	0.608276	0.921954	0.565685	0.141421	0	0.394646			86	0.67082	0	0	0	0	0.2	0.3	1.11854	0.28617
87	0	1	1	1	0	0	3				87	0.3	0.67082	2.4	0.4	0	0	0.35			87	0.824621	0	0	0	0	0.1	0.412311	0.921954	0.282361
88	0	1	1	1	0	0	3				88	0.316228	0	1.64924	0	0.2	0	0.1			88	0.282843	0.1	0	0	0	0	0.412311	1.27279	0.258493
89	0	1	1	0	0	0	2				89	0.1	0.360555	2.22036	0.583095	0	0	0.230278			89	0.282843	0	0	0.67082	0	0.3	0	1.08167	0.291916
90	0	1	0	0	0	0	1				90	0.360555	0.67082	1.23693	0.1	0.412311	0	0.386433			90	0.223607	0	0.1	0.2	0	0	0.538516	0.3	0.170265
91	0	1	1	1	0	0	3				91	0	0	0.282843	0.3	0.1	0	0.05			91	0.282843	0	0	0.2	0	0.2	0.316228	0	0.124884
92	0	1	1	1	0	0	3				92	0.223607	0	0.583095	0	0.141421	0	0.0707107			92	0.1	0	0	0	0	0	0.223607	0.447214	0.0963525
93	0	1	1	1	0	0	3				93	0.2	0	0	0.412311	0.1	0	0.05			93	0.223607	0	0.1	0.2	0	0.3	0.447214	0.781025	0.256481
94	0	1	1	1	0	0	3				94	0.2	0	0.141421	1.2	0	0	0.0707107			94	0.223607	0.1	0	0	0	0.282843	0.360555	0.360555	0.165945
95	0	1	1	1	0	0	3				95	0	0	0.412311	0.4	0	0	0			95	0	0	0	0	0.1	0.223607	0.223607	0.1	0.0809017
96	0	1	0	1	0	0	2				96	0	0	0.538516	0.632456	0	0	0			96	0.2	0	0	0.141421	0	0.2	0.2	0.2	0.117678
97	0	1	0	1	0	0	2				97	0	0	0.806226	1.69706	0	0	0			97	0	0	0	0	0	0.632456	0.1	0.223607	0.119508
98	0	1	0	0	0	0	1				98	0	0	0.632456	3.26497	0	0	0			98	0.223607	0	0	0.1	0	0.2	0.447214	0.1	0.133853
99	0	0	0	0	0	0	0				99	0.4	0	0	0.316228	0	0	0			99	0.316228	0.141421	0	0.223607	0.1	0.6	0	0.223607	0.200608
100	0	0	0	0	0	0	0				100	0.2	0	0.223607	0.632456	0	0	0.1			100	0	0	0	0.2	0.2	0.223607	0.282843	0.141421	0.130984
101	0	0	0	0	0	0	0				101	0.509902	0.2	3.1	0.316228	0	0	0.258114			101	0.3	0	0	0	0.3	0.141421	0.141421	0	0.110355
102	0	0	1	0	0	0	1				102	0	0	2.20227	0.316228	0	0	0			102	0.1	0	0	0.781025	0	0.2	0.3	0.2	0.197628
103	0	0	1	0	0	0	1				103	0	0	0.5	0	0	0	0			103	0.223607	0	0	0.1	0.1	0.223607	0.1	0.4	0.143402
104	0	0	1	0	0	0	1				104	0	0	1.00499	0.824621	0.3	0	0.15			104	0.4	0	0	0.3	0.2	0.1	0.1	0	0.1375
105	0	0	1	0	0	0	1				105	0.3	0	0	0.3	0.538516	0	0.15			105	0	0	0	0	0.223607	0.141421	0.141421	0	0.0633062
106	0	0	1	0	0	0	1				106	0	0	0.4	1.21655	0.632456	0	0.2			106	0.2	0.1	0	0	0	0.360555	0.223607	1.10454	0.248587
107	0	0	1	0	0	0	1				107	0	0	0.424264	0.583095	0.141421	0.1	0.120711			107	0.141421	0	0	0	0	0.1	0.3	0.447214	0.123579
108	0	0	0	0	0	0	0				108	0	0	0.1	0.7	0.141421	0	0.05			108	0.316228	0.2	0	0	0	0.141421	0.223607	0.447214	0.166059
109	0	0	0	0	0	0	0				109	0	0	0	0.6	0	0.1	0			109	0.2	0	0	0	0	0	0.2	0.824621	0.153078
110	0	0	0	0	0	0	0				110	0	0	0	0.2	0	0.3	0			110	0.223607	0	0	0	0.1	0.2	0.1	0.921954	0.193195
111	0	0	0	0	0	0	0				111	0.2	0	0	1.34164	0	0.282843	0.1			111	0	0.316228	0	0	0	0.2	0.2	0.447214	0.14543
112	0	0	0	0	0	0	0				112	0.360555	0	0	0.282843	0.632456	0	0.141421			112	0.223607	0.141421	0	0	0.1	0.1	0.223607	1.16619	0.244353
113	0	0	0	0	0	0	0				113	0	0	0	0.424264	0.806226	0	0			113	0.608276	0.141421	0	0	0	0.1	0.424264	0.360555	0.204315
114	0	0	0	0	0	0	0				114	0.2	0	1.43178	0	0	0	0			114	0.223607	0	0	0	0	0.141421	0.223607	1.67631	0.283118
115	0	0	1	0	0	0	1				115	0	0.412311	1.23693	0.6	0.141421	0	0.276866			115	0.1	0	0	0	0	0.1	0.141421	0.360555	0.0877471
116	0	0	1	0	0	0	1				116	0.4	0	0.905539	0.223607	0.2	0	0.211803			116	0.360555	0	0	0	0	0.1	0.1	0.360555	0.115139
117	0	1	1	0	0	0	2				117	0	0.1	0.7	0	0.447214	0	0.05			117	0.282843	0	0	0.316228	0	0.1	0.2	0.223607	0.140335
118	0	1	1	0	0	0	2				118	0.640312	0.608276	1.74642	0.4	0.1	0	0.504138			118	0.223607	0	0.2	0	0	0.509902	0.282843	0.223607	0.179995
119	0	1	0	0	0	0	1				119	0.4	0	0.412311	0.1	0	0	0.05			119	0.2	0	0.1	0.2	0	0.2	0.3	0.1	0.1375
120	0	1	0	1	0	0	2				120	0	0.2	0.3	0	0	0	0			120	0.1	0	0.1	0	0	0.3	0.223607	0.4	0.140451
121	0	1	0	0	0	0	1				121	0	0.1	0.4	0	0	0	0			121	0.2	0	0	0	0	0.761577	0.282843	0	0.155553
122	0	1	0	0	0	0	1				122	0.1	0.223607	0.565685	0.640312	0.1	0	0.161803			122	0.3	0	0	0	0	0.223607	0.2	0.2	0.115451
123	0	1	0	1	0	0	2				123	0.1	0	1.2	3.62353	0.360555	0	0.230278			123	0.2	0	0	0	0	0.316228	0.2	0.360555	0.134598
124	0	1	0	1	0	0	2				124	0.2	0.5	0.412311	2.41868	0	0.1	0.306155			124	0	0	0	0	0	0.141421	0.223607	0.223607	0.0735794
125	0	1	1	1	0	0	3				125	0	0	0.316228	0.5	0.223607	0	0.111803			125	0.1	0	0	0	0	0.282843	0.1	0.2	0.0853553
126	0	0	1	1	0	0	2				126	0.424264	0.141421	0.583095	1.65529	0	0	0.282843			126	0.447214	0	0.1	0	0	0.424264	0.316228	0	0.160963
127	0	1	1	1	0	0	3				127	0	0	1.56525	4.60977	0	0.67082	0.33541			127	0.2	0	0.141421	0	0.360555	0.316228	0.141421	0	0.144953
128	0	1	1	1	0	0	3				128	0	0.4	0.728011	3.22025	0.1	2.03961	0.564005			128	0.282843	0	0	0.1	0	0.447214	0.1	0.2	0.141257
129	0	0	0	1	0	1	2				129	0	0.447214	0.5	0.424264	0.632456	2.24722	0.473607			129	0.1	0.4	0	0	0	0.806226	0.223607	0	0.191229
130	0	0	0	0	0	1	1				130	0	0.412311	0.583095	0.806226	0	3.17805	0.497703			130	0.316228	0.4	0	0	0	0.1	0.316228	0.1	0.154057
131	0	0	0	0	0	1	1				131	0	0	0.5	0.447214	0	1.5	0.223607			131	0.316228	0.1	0	0	0	0.223607	0.1	0	0.0924793
132	0	0	0	0	0	0	0				132	0	0	0.4	0.806226	0	0.781025	0.2			132	0.2	0.1	0	0	0	0.412311	0.141421	0	0.106716
133	0	0	0	0	0	0	0				133	0	0.1	0.447214	0.2	0	0.360555	0.15			133	0.1	0	0	0	0	0.3	0.1	0	0.0625
134	0	0	0	0	0	0	0				134	0.2	0.1	0	0.608276	0	0	0.05			134	0.360555	0	0	0	0	0.223607	0.1	0	0.0855202
135	0	0	0	0	0	0	0				135	0.3	0.1	0	0.360555	0	0.5	0.2			135	0.282843	0	0	0	0	0.282843	0.141421	0	0.0883883
136	0	0	0	0	0	0	0				136	0.3	0.1	0.223607	0.316228	0	0.412311	0.261803			136	0.2	0	0	0	0	0.6	0.316228	0	0.139528
137	0	0	0	0	0	0	0				137	0.2	0	0	0.360555	0.223607	0.2	0.2			137	0.141421	0	0	0	0	0.3	0.1	0.1	0.0801777
138	0	0	0	0	0	0	0				138	0.3	0.509902	0	0.2	0.608276	0.2	0.25			138	0.761577	0	0.447214	0	0	0.1	0.424264	0.2	0.241632
139	0	0	0	0	0	0	0				139	0	0	0	0.761577	0.4	0.282843	0.141421			139	0.583095	0	0	0	0	0.1	0.2	0	0.110387
140	0	0	0	0	0	0	0				140	0.728011	0	0	0.1	0	0.4	0.05			140	0.360555	0	0	0	0	0.141421	0.141421	0	0.0804247
141	0	0	0	0	0	0	0				141	0	0	0	0	0.360555	0.223607	0			141	0.141421	0	0	0	0.5	0.223607	0.1	0.2	0.145629
142	0	0	0	0	0	0	0				142	0	0.412311	0.3	0	0.1	0.282843	0.191421			142	0.141421	0.538516	0.3	0	0.2	0.1	0.223607	0	0.187943
143	0	0	0	0	0	0	0				143	0.2	0	0	0	0.5	0.3	0.1			143	0.360555	0.2	0.1	0	0	0.223607	0.1	0.4	0.17302
144	0	0	0	0	0	0	0				144	0	0	0	0	0	0	0			144	0	0.282843	0.8	0	0.5	0.2	0.2	0	0.247855
145	0	0	0	0	0	0	0				145	0	0.223607	0	0.223607	0.412311	0	0.111803			145	0.1	0	0.316228	0	0.141421	0.3	0	0.2	0.132206
146	0	0	0	0	0	0	0				146	0	0.316228	0	0	0	0.1	0			146	0.141421	0	0.360555	0	0.412311	0	0	0	0.114286
147	0	0	0	0	0	0	0				147	0.2	0	0	0	0	0	0			147	0.1	0.2	0	0	0	0.3	0	0	0.075
148	0	0	0	0	0	0	0				148	0	0	0	0	0.2	0	0			148	0.223607	0.141421	0	0	0	0.1	0.360555	0	0.103198
149	0	0	0	0	0	0	0				149	0	0	0	0	0	0.316228	0			149	0.141421	0	0	0	0	0.1	0.223607	0	0.0581285
150	0	0	0	0	0	0	0				150	0	0	0	0	0	0	0			150	0.141421	0	0	0	0	0.1	0	0	0.0301777
151	0	0	0	0	0	0	0				151	0	0.412311	0	0	0.3	0	0			151	0.1	0	0	0	0	0.3	0	0	0.05
152	0	0	0	0	0	0	0				152	0	0.2	0	0	0.1	0.447214	0.05			152	0	0	0.412311	0	0.1	0.3	0	0	0.101539
153	0	0	0	0	0	0	0				153	0.1	0.447214	0	0	0.538516	0	0.05			153	0.223607	0	0.282843	0	0.1	0.4	0.1	0	0.138306
154	0	0	0	0	0	0	0				154	0	0.360555	0	0	0.282843	0	0			154	0	0	0.1	0	0	0.5	0	0	0.075
155	0	0	0	0	0	0	0				155	0.2	0	0.141421	0	0.4	0	0.0707107			155	0.1	0	0.3	0	0	0.223607	0	0	0.0779508
156	0	0	0	0	0	0	0				156	0.223607	0	0	0	0.608276	0	0			156	0.223607	0	0	0	0	0.141421	0.2	0	0.0706285
157	0	0	0	0	0	0	0				157	0	0	0	0	0.223607	0	0			157	0.447214	0	0	0	0.1	0.3	0	0	0.105902
158	0	0	0	0	0	0	0				158	0.223607	0	0	0	0.1	0.1	0.05			158	0.316228	0	0	0	0	0.1	0.2	0	0.0770285
159	0	0	0	0	0	0	0				159	0	0.282843	0	0	0.2	0	0			159	0.223607	0	0	0	0	0.538516	0	0	0.0952654
160	0	0	0	0	0	0	0				160	0	0.1	0	0	0.1	0.447214	0.05			160	0.1	0	0.141421	0	0	0.223607	0.223607	0.1	0.0985794
161	0	0	0	0	0	0	0				161	0	0	0	0	0.412311	0.2	0			161	0.3	0	0.412311	0.3	0.141421	0.4	0.1	0	0.206716
162	0	0	0	0	0	0	0				162	0	0.1	0	0	0.360555	0	0			162	0.316228	0	0.223607	0	0	0.2	0	0	0.0924793
163	0	0	0	0	0	0	0				163	0	0	0	0	0	0	0			163	0.316228	0	0	0.5	0	0.1	0.1	0	0.127028
164	0	0	0	0	0	0	0				164	0	0	0	0	0.2	0	0			164	0.1	0	0	0	0	0.282843	0	0	0.0478553
165	0	0	0	0	0	0	0				165	0	0	0	0	0	0	0			165	0.3	0	0.2	0	0	0.1	0.360555	0	0.120069
166	0	0	0	0	0	0	0				166	0	0.4	0	0.223607	0.223607	0	0.111803			166	0.223607	0	0	0	0	0.3	0.2	0	0.0904508
167	0	0	0	0	0	0	0				167	0.72111	0	0	0	0.2	0	0			167	0.1	0.360555	0	0	0	0	0.447214	0	0.113471
168	0	0	0	0	0	0	0				168	0	0	0	0.223607	0.1	0	0			168	0.824621	1.11803	0	0	0	0.2	0.141421	0	0.28551
169	0	0	0	0	0	0	0				169	0	0.1	0.1	0.2	0	0	0.05			169	0.282843	0	0	0	0	0.141421	0.1	0	0.065533
170	0	0	0	0	0	0	0				170	0.282843	0.141421	0	0.1	0	0	0.05			170	0.4	0	0	0	0	0.412311	0.538516	0	0.168853
171	0	0	0	0	0	0	0				171	0.583095	0	0	0.1	0.2	0	0.05			171	1.04403	0	0	0	0	0.447214	0.1	0	0.198906
172	0	0	0	0	0	0	0				172	0.1	0	0	0	0.4	0	0			172	0.447214	0	0	0	0	0.1	0.1	0	0.0809017
173	0	0	0	0	0	0	0				173	0.1	0	0	0	0	0	0			173	0.412311	0	0	0	0	0.141421	0	0.316228	0.108745
174	0	0	0	0	0	0	0				174	0.1	0	0	0	0.1	0	0			174	0.141421	0	0	0	0	0.141421	0.1	0	0.0478553
175	0	0	0	0	0	0	0				175	0.1	0.3	0	0	0.1	0	0.05			175	0.2	0	0	0	0	0.223607	0.1	0	0.0654508
176	0	0	0	0	0	0	0				176	0.2	0.4	0	0.141421	0	0	0.0707107			176	0.538516	0	0	0	0	0.141421	0	0.1	0.0974922
177	0	0	0	0	0	0	0				177	0	0	0	0.447214	0	0.141421	0			177	0.316228	0	0	0	0	0.1	0	0.2	0.0770285
178	0	0	0	0	0	0	0				178	0	0.3	0	0.1	0	0.1	0.05			178	0.360555	0	0	0.1	0	0.223607	0	0	0.0855202
179	0	0	0	0	0	0	0				179	0	0	0	0	0.412311	0	0			179	0.2	0	0	0.360555	0	0.1	0	0.282843	0.117925
180	0	0	0	0	0	0	0				180										180

## Sheet: Sheet 7
Sheet 7.		Parameters of mass spawning event in S. intermedius 19 May of 2016, in Alekseev Bay
		Blue raws denote the beginning and the end of spawning in males. The cells with figure "1" highlited by green color denote the presence of gamete clots on the aboral surface of males and females.
						Male spawning events												Step length of males, cm																	Female spawning events								Step length of females, cm
Time, min	Male-1	Male-10	Male-11	Male-12	Male-13	Male-2	Male-3	Male-4	Male-5	Male-6	Male-7	Male-8	Male-9	Dynamics of male spawning			Time, min	Male-1	Male-10	Male-11	Male-12	Male-13	Male-2	Male-3	Male-4	Male-5	Male-6	Male-7	Male-8	Male-9	Median step length			Time, min	Female-1	Female-2	Dynamics of female spawning					Time, min	Female-1	Female-2	Median step length				Time, min
1	0	0	0	0	0	0	0	0	0	0	0	0	0	0			1																	1	0	0	0					1							1
2	0	0	0	0	0	0	0	0	0	0	0	0	0	0			2	0.7	0.316228	0.1	0.316228	0.1	0.360555	0.1	0.223607	0	0.1	0	0.860233	0.1	0.1			2	0	0	0					2	0	0.2	0.1				2
3	0	0	0	0	0	0	0	0	0	0	0	0	0	0			3	0.6	0.316228	0.223607	0	0	0.1	0.2	0.509902	0.141421	0.1	0	0.2	0	0.141421			3	0	0	0					3	0	0.316228	0.158114				3
4	0	0	0	0	0	0	0	0	0	0	0	0	0	0			4	1.26491	0.1	0	0.141421	0	0.3	0.1	0.424264	0.2	0.223607	0	0	0.1	0.1			4	0	0	0					4	0.1	0	0.05				4
5	0	0	0	0	0	0	0	0	0	0	0	0	0	0			5	0.824621	0	0.3	0	0	0.4	0.360555	0.223607	0.2	0	0.1	0	0.141421	0.141421			5	0	0	0					5	0	0.141421	0.0707107				5
6	0	0	0	0	0	0	0	0	0	0	0	0	0	0			6	0.1	0.1	0.141421	0	0	0.632456	0.2	0.141421	0.282843	0	0.2	0.632456	0.509902	0.141421			6	0	0	0					6	0	0.223607	0.111803				6
7	0	0	0	0	0	0	0	0	0	0	0	0	0	0			7	0	0	0.1	0.1	0	0.583095	0.141421	0.412311	0	0	0.7	0	0.2	0.1			7	0	0	0					7	0	0.223607	0.111803				7
8	0	0	0	0	0	0	0	0	0	0	0	0	0	0			8	0.2	0.1	0.1	0.1	0	0.447214	0	0.3	0	0	0.412311	0	0.1	0.1			8	0	0	0					8	0.1	0.1	0.1				8
9	0	0	0	0	0	0	0	0	0	0	0	0	0	0			9	0.2	0.1	0.2	0.1	0.360555	0.412311	0.223607	0.223607	0	0	0	0	0.1	0.1			9	0	0	0					9	0	0	0				9
10	0	0	0	0	0	0	0	0	0	0	0	0	0	0			10	0.316228	0.1	0.223607	0.2	0.223607	0.4	0	0.360555	0.1	0.1	0.360555	0	0	0.2			10	0	0	0					10	0.223607	0.223607	0.223607				10
11	0	0	0	0	0	0	0	0	0	0	0	0	0	0			11	0.1	0.1	0.2	0.223607	0.141421	0.565685	0.141421	0.141421	0.141421	0.141421	0.141421	0	0.1	0.141421			11	0	0	0					11	0.1	0.223607	0.161803				11
12	0	0	0	0	0	0	0	0	0	0	0	0	0	0			12	0.4	0.3	0.1	0.1	0.1	0.360555	0	0.447214	0.2	0	0.141421	0	0.316228	0.141421			12	0	0	0					12	0.424264	0.141421	0.282843				12
13	0	0	0	0	0	0	0	0	0	0	0	0	0	0			13	0.424264	0.1	0.282843	0.141421	0.141421	0.1	0.141421	0.360555	0.1	0.1	0	0	0	0.1			13	0	0	0					13	0.412311	0.223607	0.317959				13
14	0	0	0	0	0	0	0	0	0	0	0	0	0	0			14	0.72111	0	0.1	0.3	0	0.2	0.1	0.1	0.3	0	0.2	0.316228	0	0.1			14	0	0	0					14	0.2	0	0.1				14
15	0	0	0	0	0	0	0	0	0	0	0	0	0	0			15	0	0.282843	0	0	0.360555	0.1	0.2	0.538516	0	0	0	0	0	0			15	0	0	0					15	0	0.223607	0.111803				15
16	0	0	0	0	0	0	0	0	0	0	0	0	0	0			16	0.282843	0.1	0.141421	0.141421	0.5	0.141421	0.223607	0	0.316228	0.1	0	0.316228	0	0.141421			16	0	0	0					16	0	0	0				16
17	0	0	0	0	0	0	0	0	0	0	0	0	0	0			17	0.141421	0.3	0	0.141421	0	0.1	0.223607	0.1	0.2	0.1	0.2	0.2	0.412311	0.141421			17	0	0	0					17	0.1	0	0.05				17
18	0	0	0	0	0	0	0	0	0	0	0	0	0	0			18	0.447214	0.2	0	0	0.316228	0.412311	0	0.316228	0	0.141421	0.2	0.5	0.632456	0.2			18	0	0	0					18	0.141421	0.1	0.120711				18
19	0	0	0	0	0	0	0	0	0	0	0	0	0	0			19	0.141421	0.223607	0	0	0.1	0.141421	0	0.316228	0.2	0	0.3	0.447214	0	0.141421			19	0	0	0					19	0.1	0.2	0.15				19
20	0	0	0	0	0	0	0	0	0	0	0	0	0	0			20	0.4	0.223607	0.282843	0.2	0	0.141421	0.538516	0.223607	0.2	0	0.5	0	0	0.2			20	0	0	0					20	0.2	0.2	0.2				20
21	0	0	0	0	0	0	0	0	0	0	0	0	0	0			21	0.1	0.360555	0	0	0	0.2	0.141421	0.223607	0	0	0.141421	0	0	0			21	0	0	0					21	0.728011	0	0.364005				21
22	0	0	0	0	0	0	0	0	0	0	0	0	0	0			22	0.316228	0.1	0	0	0	0.1	0.223607	0.141421	0.1	0	0	0.1	0	0.1			22	0	0	0					22	0	0.282843	0.141421				22
23	0	0	0	0	0	0	0	0	0	0	0	0	0	0			23	0.1	0.2	0.1	0	0.1	0.316228	0.1	0.2	0.1	0	0	0.360555	0	0.1			23	0	0	0					23	0	0.2	0.1				23
24	0	0	0	0	0	0	0	0	0	0	0	0	0	0			24	0.4	0.3	0.9	0.1	0.316228	0	0.141421	0.1	0	0	0.2	0.2	0.1	0.141421			24	0	0	0					24	0	0.1	0.05				24
25	0	0	0	0	0	0	0	0	0	0	0	0	0	0			25	0.141421	0.141421	0.905539	0	0.223607	0.1	0.141421	0.360555	0	0	0.3	0	0	0.141421			25	0	0	0					25	0.2	0.141421	0.170711				25
26	0	0	0	0	0	0	0	0	0	0	0	0	0	0			26	0.1	0.141421	0	0	0.141421	0.1	0	0.223607	0	0.1	0.632456	0	0	0.1			26	0	0	0					26	0	0.1	0.05				26
27	0	0	0	0	0	0	0	0	0	0	0	0	0	0			27	0.3	0	0	0.1	0	0.4	0	0.316228	0	0	0.223607	0	0	0			27	0	0	0					27	0.2	0.141421	0.170711				27
28	0	0	0	0	0	0	0	0	0	0	0	0	0	0			28	0.1	0.1	0	0.1	0	0.141421	0	0.141421	0	0.1	0.509902	0.141421	0.1	0.1			28	0	0	0					28	0	0	0				28
29	0	0	0	0	0	0	0	0	0	0	0	0	0	0			29	0.1	0.223607	0	0.141421	0.223607	0.538516	0	0.223607	0	0	0.583095	0.632456	0.1	0.141421			29	0	0	0					29	0.640312	0.2	0.420156				29
30	0	0	0	0	0	0	0	0	0	0	0	0	0	0			30	0.2	0.1	0	0	0	0.1	0.223607	0.1	0	0	0	0	0	0			30	0	0	0					30	0.223607	0.223607	0.223607				30
31	0	0	0	0	0	0	0	0	0	0	0	0	0	0			31	0.1	0.223607	0	0.1	0.360555	0.1	0.2	0.141421	0	0	0	0	0.141421	0.1			31	0	0	0					31	0	0.1	0.05				31
32	0	0	0	0	0	0	0	0	0	0	0	0	0	0			32	0.2	0.141421	0	0.1	0.4	0	0	0.1	0	0	0.424264	0.424264	0.608276	0.1			32	0	0	0					32	0.1	0	0.05				32
33	0	0	0	0	0	0	0	0	0	0	0	0	0	0			33	0	0.223607	0	0.1	0.447214	0.1	0.360555	0.141421	0	0	0.447214	0	0.223607	0.1			33	0	0	0					33	0.1	0.141421	0.120711				33
34	0	0	0	0	0	0	0	0	0	0	0	0	0	0			34	0.3	0.5	0	0	0.282843	0.2	0	0.223607	0	0	0.141421	0	0.1	0.1			34	0	0	0					34	0	0.141421	0.0707107				34
35	0	0	0	0	0	0	0	0	0	0	0	0	0	0			35	0.223607	0.2	0.1	0.1	0.1	0	0.141421	0.2	0	0	0.2	0.761577	0	0.1			35	0	0	0					35	0.412311	0.141421	0.276866				35
36	0	0	0	0	0	0	0	0	0	0	0	0	0	0			36	0.2	0.3	0	0.1	0	0.223607	0.141421	0.1	0	0	0	0	0.223607	0.1			36	0	0	0					36	0	0	0				36
37	0	0	0	0	0	0	0	0	0	0	0	0	0	0			37	0	0.360555	0	0.1	0.282843	0.282843	0	0.223607	0	0	0.424264	0.761577	0	0.1			37	0	0	0					37	0.2	0.141421	0.170711				37
38	0	0	0	0	0	0	0	0	0	0	0	0	0	0			38	0.1	0.1	0.9	0.1	0.223607	0.1	0.223607	0.2	0	0.1	0.2	0	0	0.1			38	0	0	0					38	0	0.1	0.05				38
39	0	0	0	0	0	0	0	0	0	0	0	0	0	0			39	0.316228	0.316228	1.47648	0.948683	0.223607	0.3	0	0.316228	0	0	0	0	0	0.223607			39	0	0	0					39	0	0.223607	0.111803				39
40	0	0	0	0	0	0	0	0	0	0	0	0	0	0			40	0.608276	0.141421	0.2	0	0.282843	0.1	0	0.2	0	0	0.424264	0.2	0	0.141421			40	0	0	0					40	0.316228	0.141421	0.228825				40
41	0	0	0	0	0	0	0	0	0	0	0	0	0	0			41	0.447214	0.223607	0.7	0.316228	0	0.4	0	0.316228	0	0	0.3	1.11803	0	0.3			41	0	0	0					41	0	0.141421	0.0707107				41
42	0	0	0	0	0	0	0	0	0	0	0	0	0	0			42	0.4	0.360555	0.5	0	0	0.141421	0	0.447214	0	0	0.360555	0	0	0			42	0	0	0					42	0	0.1	0.05				42
43	0	0	0	0	0	0	0	0	0	0	0	0	0	0			43	0	0.223607	0.1	0	0.3	0.1	0	0.2	0.1	0	0.141421	0	0	0.1			43	0	0	0					43	0.282843	0.141421	0.212132				43
44	0	0	0	0	0	0	0	0	0	0	0	0	0	0			44	0	0.2	0	0.2	0.72111	0.1	0.2	0.1	0	0.141421	0.360555	0.3	0	0.141421			44	0	0	0					44	0.1	0.1	0.1				44
45	0	0	0	0	0	0	0	0	0	0	0	0	0	0			45	0.3	0.316228	0	0	0.141421	0.141421	0.1	0.141421	0	0.1	0.447214	0.1	0	0.1			45	0	0	0					45	0.1	0.1	0.1				45
46	0	0	0	0	0	0	0	0	0	0	0	0	0	0			46	0.424264	0.316228	0	0	0	0.583095	0.141421	0.223607	0	0	0.509902	0	0	0			46	0	0	0					46	0	0.1	0.05				46
47	0	0	0	0	0	0	0	0	0	0	0	0	0	0			47	0.1	0.1	0	0	0.141421	0	0	0.509902	0	0	0.223607	0.5	0	0			47	0	0	0					47	0	0.360555	0.180278				47
48	0	0	0	0	0	0	0	0	0	0	0	0	0	0			48	0.2	0.2	0.141421	0.2	0.223607	0.6	0	0.1	0	0	0.3	0.447214	0	0.2			48	0	0	0					48	0.1	0.141421	0.120711				48
49	0	0	0	0	0	0	0	0	0	0	0	0	0	0			49	0.1	0.141421	0.2	0.1	0.141421	0.1	0	0.1	0	0.223607	0.2	0.707107	0	0.1			49	0	0	0					49	0.141421	0.1	0.120711				49
50	0	0	0	0	0	0	0	0	0	0	0	0	0	0			50	0.3	0.1	0.3	0	0.360555	0.282843	0.223607	0.360555	0.2	0.1	0.282843	0	0	0.223607			50	0	0	0					50	0	0.141421	0.0707107				50
51	0	0	0	0	0	0	0	0	0	0	0	0	0	0			51	0.2	0.360555	0.141421	0.1	0	0.1	0	0.223607	0.316228	0	0.424264	0	0	0.1			51	0	0	0					51	0	0	0				51
52	0	0	0	0	0	0	0	0	0	0	0	0	0	0			52	0.141421	0.316228	0.1	0	0	0.412311	0	0.282843	0.316228	0	0.141421	0	0	0.1			52	0	0	0					52	0.1	0	0.05				52
53	0	0	0	0	0	0	0	0	0	0	0	0	0	0			53	0.1	0.2	0.141421	0	0.141421	0.2	0.1	0.141421	0	0	0.67082	0	0	0.1			53	0	0	0					53	0	0.1	0.05				53
54	0	0	0	0	0	0	0	0	0	0	0	0	0	0			54	0.223607	0.316228	0.141421	0	0.1	0.282843	0.1	0.447214	0	0.1	0.316228	0.707107	0.1	0.141421			54	0	0	0					54	0.921954	0.141421	0.531688				54
55	0	0	0	0	0	0	0	0	0	0	0	0	0	0			55	0	0.316228	0.1	0	0	0.2	0.141421	0.447214	0	0	0.282843	0.360555	0	0.1			55	0	0	0					55	0.316228	0.1	0.208114				55
56	0	0	0	0	0	0	0	0	0	0	0	0	0	0			56	0.360555	0	0.1	0.316228	0	0.316228	0	0.1	0	0	0.223607	0.360555	0	0.1			56	0	0	0					56	0.1	0	0.05				56
57	0	0	0	0	0	0	0	0	0	0	0	0	0	0			57	0.2	0	0.3	0.3	0.1	0.707107	0.316228	0.2	0	0	0.5	0.447214	0	0.2			57	0	0	0					57	0.223607	0.1	0.161803				57
58	0	0	0	0	0	0	0	0	0	0	0	0	0	0			58	0.141421	0.282843	0.316228	0	0.3	0.3	0.1	0.640312	0	0.1	0	0.447214	0	0.141421			58	0	0	0					58	0.1	0.360555	0.230278				58
59	0	0	0	0	0	0	0	0	0	0	0	0	0	0			59	0.1	0.2	0.1	0	0	0.3	0.1	0.5	0	0	0.1	0.424264	0	0.1			59	0	0	0					59	0	0.1	0.05				59
60	0	0	0	0	0	0	0	0	0	0	0	0	0	0			60	0.1	0.223607	0.141421	0	0.2	0.1	0.1	0.2	0	0.1	0.1	0	0	0.1			60	0	0	0					60	0	0.141421	0.0707107				60
61	1	0	0	0	0	1	0	0	0	0	0	0	0	2			61	1.23693	0.141421	0.4	0	0.223607	1.16619	0	0.5	0	0.223607	0	0.282843	0	0.223607			61	0	0	0					61	0	0.1	0.05				61
62	1	0	0	0	0	1	0	0	0	0	0	0	0	2			62	0.1	0.424264	0.1	0	0	1.30384	0.223607	0.141421	0	0.1	0.2	1.253	0	0.1			62	0	0	0					62	0	0.141421	0.0707107				62
63	1	0	0	0	0	1	0	0	0	0	0	0	0	2			63	0.8544	0.509902	0.2	0	0.3	0.921954	0	0.223607	0	0.141421	0.1	0.424264	0	0.2			63	0	0	0					63	0	0.1	0.05				63
64	1	0	0	0	0	1	0	0	0	0	0	0	0	2			64	0.2	0.223607	0.1	0.1	0.412311	0.509902	0	0	0.2	0	0	0.707107	0	0.1			64	0	0	0					64	0.360555	0.2	0.280278				64
65	1	0	0	0	0	1	0	0	0	0	0	0	0	2			65	0	0.223607	0.2	0	0	0.3	0	0.141421	0.4	0	0.1	1.61245	0	0.1			65	0	0	0					65	0.1	0.1	0.1				65
66	1	0	0	0	0	1	1	0	0	0	0	0	0	3			66	0.316228	0.282843	0.223607	0.2	0.447214	0.5	0.2	0.223607	0	0.1	0.1	1.253	0.1	0.223607			66	0	0	0					66	0	0.1	0.05				66
67	1	0	0	0	0	1	1	0	0	0	0	0	0	3			67	0.1	0.424264	0	0	0.282843	0.1	0.360555	0	0	0.1	0.282843	0.824621	0	0.1			67	0	0	0					67	0	0.1	0.05				67
68	1	0	0	0	0	1	1	0	0	0	0	0	0	3			68	0.223607	0.223607	0.141421	0.1	0	0.67082	0.1	0.1	0.1	0.1	0	0.6	0.360555	0.1			68	0	0	0					68	0.67082	0.2	0.43541				68
69	1	0	0	0	0	1	1	0	0	0	0	0	0	3			69	0.141421	0.282843	0.1	0	0.141421	0.316228	0.67082	0.316228	0	0	0	0.316228	0	0.141421			69	0	0	0					69	0	0.1	0.05				69
70	1	0	0	0	0	1	0	0	0	0	0	0	0	2			70	0.761577	0.1	0.223607	0.1	0.223607	0.806226	2.02485	0.223607	0	0.2	0	0	0	0.2			70	0	0	0					70	0.360555	0.2	0.280278				70
71	1	0	0	0	0	1	0	0	0	0	0	0	0	2			71	0.538516	0.1	0.2	0.1	0.360555	0.282843	1.92094	0.2	0	0.141421	0.806226	0	0	0.2			71	0	0	0					71	0.223607	0.1	0.161803				71
72	0	0	0	0	0	0	0	0	0	0	0	0	0	0			72	0.632456	0.223607	0.3	0.1	0.316228	0.2	1.98494	0	1.64012	0	0.141421	0	0	0.2			72	0	0	0					72	0.316228	0.141421	0.228825				72
73	1	0	0	0	0	1	0	0	0	0	0	0	0	2			73	0.2	0.223607	0.223607	0.1	0.141421	0.5	0.781025	0	0.141421	0	0.1	0	0	0.141421			73	0	0	0					73	0.223607	0.1	0.161803				73
74	1	0	0	0	0	1	0	0	0	1	0	0	0	3			74	0.640312	0.141421	0.2	0	0.1	0.806226	0.921954	0	0	0	0.583095	0.424264	0	0.141421			74	0	0	0					74	0.141421	0.316228	0.228825				74
75	1	0	0	0	0	1	1	0	1	1	0	0	0	5			75	0.2	0	0.316228	0	0.141421	0	0.1	0	0	0.1	0.223607	0.412311	0	0.1			75	0	0	0					75	0.3	0.141421	0.220711				75
76	1	0	0	0	0	1	0	0	1	0	0	0	0	3			76	0.538516	0.223607	0.1	0	0.2	0.4	0	0.1	0	0.141421	0.316228	0.565685	0	0.141421			76	0	0	0					76	0.1	0.141421	0.120711				76
77	1	0	0	0	0	0	0	0	1	0	0	0	0	2			77	0.412311	0.282843	0.316228	0.1	0.1	0.781025	0	0.282843	0.412311	0	0.1	0	0	0.1			77	0	0	0					77	0.1	0	0.05				77
78	1	0	0	0	0	1	1	0	1	0	0	0	0	4			78	0.3	0.223607	0	0.360555	0	0.2	0.316228	0.1	0	0.2	0.1	0	0	0.1			78	0	0	0					78	0.316228	0.223607	0.269917				78
79	1	0	0	0	0	1	1	0	1	0	0	0	0	4			79	0	0.141421	0.360555	0	0.223607	0.2	1.27279	0	0.72111	0	0.2	0.824621	0	0.2			79	0	0	0					79	0	0.1	0.05				79
80	1	0	0	0	0	1	1	0	1	0	0	0	0	4			80	0.447214	0.1	0.223607	0	0	0.412311	0.8544	0.141421	0.223607	0.1	0	0.316228	0	0.141421			80	0	0	0					80	0.412311	0.223607	0.317959				80
81	1	0	0	0	0	0	1	0	1	0	0	0	0	3			81	0.921954	0.141421	0.141421	0	0	0.1	0.141421	0	0.6	0	0.1	0	0	0.1			81	0	0	0					81	0.1	0.141421	0.120711				81
82	1	0	0	0	0	0	0	0	1	1	0	0	0	3			82	0.761577	0.360555	0.141421	0.1	0.447214	0.8	0.608276	0	0	0	0	0	0	0.1			82	0	0	0					82	0.3	0.2	0.25				82
83	1	0	0	0	0	1	0	0	1	1	0	0	0	4			83	1.39284	0.1	0.223607	0	0.223607	0.412311	0.141421	0	0.565685	0	0	0	0	0.1			83	0	0	0					83	0	0.360555	0.180278				83
84	1	0	0	0	0	1	1	0	1	0	0	0	0	4			84	0.223607	0.1	0.2	0.1	0.316228	0.447214	0	0	0	0	0.2	0	0	0.1			84	0	0	0					84	0.3	0.282843	0.291421				84
85	1	0	0	0	0	1	1	0	0	0	0	0	0	3			85	0.282843	0.2	0.223607	0.447214	0	0.1	0.360555	0	0	0.3	0.1	0.316228	0	0.2			85	0	0	0					85	0.608276	0.3	0.454138				85
86	1	0	0	0	0	1	1	0	0	0	0	0	0	3			86	0.316228	0.509902	0.1	0.728011	0.223607	0.5	0.509902	0	0.860233	0	0	0.360555	0	0.316228			86	0	0	0					86	0	0.509902	0.254951				86
87	1	0	0	0	0	0	1	0	0	0	0	0	0	2			87	0.509902	0.2	0	0.6	0.412311	0.316228	0.412311	0	0.282843	0	0	1.33417	0	0.282843			87	0	0	0					87	0	0.360555	0.180278				87
88	1	0	0	0	0	0	1	0	0	0	0	0	0	2			88	0.223607	0.141421	0.2	0.5	0.141421	0.6	0.538516	0	0	0.1	0	0.360555	0	0.141421			88	0	0	0					88	0.1	0.632456	0.366228				88
89	1	0	0	0	0	1	1	0	0	0	0	0	0	3			89	0.1	0.316228	0.223607	0.223607	0.2	0.2	0.3	0.1	0	0.141421	0.223607	0.1	0	0.2			89	0	0	0					89	0.223607	0.141421	0.182514				89
90	1	0	0	0	0	1	1	1	0	0	0	0	0	4			90	0.1	0.223607	0.412311	0.360555	0	0.761577	0.921954	0	0	0	0	0	0	0			90	0	0	0					90	0	0.984886	0.492443				90
91	1	0	0	0	0	1	1	1	0	0	0	0	0	4			91	0.2	0.282843	0.412311	0.316228	0	0.2	0.583095	0	0	0	0.316228	0.509902	0	0.2			91	0	0	0					91	0.6	0.316228	0.458114				91
92	1	0	0	0	0	1	1	1	0	0	0	0	0	4			92	0.424264	0.2	0.282843	0.1	0.4	0.583095	0.894427	0.141421	0	0	0	0	0	0.141421			92	0	0	0					92	0	0.360555	0.180278				92
93	1	0	0	0	0	1	1	1	0	1	0	0	0	5			93	0.3	0.223607	0.223607	0.424264	0.316228	0	0.538516	0	0	0.223607	0	0.8544	0	0.223607			93	0	0	0					93	0.1	0.2	0.15				93
94	1	0	0	0	0	1	1	1	0	1	0	0	0	5			94	0.412311	0.1	0.223607	0.848528	0.223607	0.2	1.81108	0.2	0	0.141421	0	0.223607	0	0.2			94	0	0	0					94	0.223607	0.223607	0.223607				94
95	1	0	0	0	0	0	1	1	0	0	0	0	0	3			95	0.728011	0.707107	0.447214	0.2	0.447214	0.1	3.47131	0	0	0.141421	0.360555	0.72111	0.632456	0.447214			95	0	0	0					95	0.1	0.707107	0.403553				95
96	1	0	0	0	0	0	1	1	0	0	0	0	0	3			96	0.6	0.223607	0.282843	0.538516	0	0.1	3.18904	0	0	0	0.1	0.412311	0	0.1			96	0	0	0					96	0.707107	0.223607	0.465357				96
97	1	0	0	0	0	1	1	1	0	0	0	0	0	4			97	1.17047	0.141421	0.141421	0	0.412311	0.509902	0.5	0	0	0	0.141421	0	0	0.141421			97	0	0	0					97	0.583095	0.1	0.341548				97
98	1	0	0	0	0	1	1	1	0	0	0	1	1	6			98	0.1	0.141421	0.223607	0.316228	0.412311	0.608276	0.1	0	0	0	0.1	0.282843	0	0.1			98	1	0	1					98	0.1	0.223607	0.161803				98
99	1	0	0	1	0	1	1	1	0	1	0	1	1	8			99	0.2	0.141421	0.1	0.67082	0.141421	0.707107	0.282843	0.2	0.1	0.141421	0.223607	0.141421	0	0.141421			99	1	0	1					99	0.223607	0.1	0.161803				99
100	1	0	0	1	0	0	1	1	0	0	0	1	1	6			100	0.2	0.1	0.223607	0.707107	0	0.316228	0.707107	0	0.1	0.223607	0.223607	0.583095	0	0.223607			100	1	0	1					100	0.707107	0.282843	0.494975				100
101	1	0	0	1	0	0	1	1	0	0	0	1	1	6			101	0.5	0.141421	0.141421	0.921954	0.412311	0.223607	0.424264	0	0	0	0	0.3	0	0.141421			101	1	0	1					101	0	0.282843	0.141421				101
102	1	0	0	0	0	0	1	0	0	0	0	1	1	4			102	0.3	0.316228	0.223607	0.921954	0.2	0.447214	0.4	0	0.282843	0.2	0	0	0	0.223607			102	0	0	0					102	0	0.412311	0.206155				102
103	1	0	0	0	0	0	1	0	0	0	0	1	1	4			103	0.1	0	0.1	0.360555	0.2	0	0.6	0	0	0.141421	0	0.2	0.538516	0.1			103	0	0	0					103	0	0.4	0.2				103
104	1	0	0	0	0	0	0	0	0	0	0	0	0	1			104	0.5	0	0.1	0.447214	0	0.316228	0.316228	0	0	0	0.1	0.1	0.1	0.1			104	0	0	0					104	0	0.141421	0.0707107				104
105	1	0	0	0	0	0	0	0	0	0	0	0	0	1			105	0.316228	0.2	0.1	0.640312	0	0.1	0.583095	0	0	0	0.1	0.2	0.1	0.1			105	0	0	0					105	0	0.806226	0.403113				105
106	1	0	0	0	0	0	1	0	0	0	0	0	0	2			106	0	0	0.2	0.905539	0.640312	0	1.04403	0	0.223607	0	0.223607	0.640312	0.3	0.223607			106	0	0	0					106	0	1.97239	0.986197				106
107	1	0	0	0	0	0	1	0	0	0	0	0	0	2			107	0.1	0.2	0.141421	0.7	0.632456	0.316228	3.37343	0.1	0	0.2	0.7	0	0.2	0.2			107	1	0	1					107	0.3	2.28734	1.29367				107
108	1	0	1	0	0	0	1	0	0	0	0	1	1	5			108	0.282843	0.141421	0.1	0.4	0	0.223607	0.761577	0.1	1.16619	0.1	1.94165	0	0	0.141421			108	1	1	2					108	0	1.30862	0.65431				108
109	1	0	1	0	0	0	1	0	0	0	0	1	1	5			109	0.141421	0.223607	0.141421	0.141421	0.141421	1.28062	0.8	0	0.141421	0.316228	1.14018	0	0	0.141421			109	1	1	2					109	0	0.606275	0.303137				109
110	1	0	0	0	0	0	0	0	0	0	1	1	1	4			110	0.583095	0.3	0.141421	0.141421	0	0.447214	1	0	0	0.1	1.11803	0	0.282843	0.141421			110	0	0	0					110	0.424264	0.478774	0.451519				110
111	1	0	0	0	0	0	0	0	0	0	1	1	1	4			111	0.141421	0.223607	0	0.848528	0.5	0.3	4.46648	0.223607	0	0.2	0.4	0.1	0	0.223607			111	0	0	0					111	0	1.36771	0.683854				111
112	1	0	0	0	0	0	0	0	0	0	1	1	1	4			112	0.360555	0.1	0.141421	0.316228	0.640312	0.424264	1.40086	0.2	0	0	0	0.2	0	0.2			112	0	0	0					112	0	0.560057	0.280029				112
113	1	0	0	0	0	0	0	1	0	0	0	1	1	4			113	0.707107	0.223607	0.223607	0.5	0.3	0.632456	1.5902	0.1	0.141421	0	0.1	0.223607	0	0.223607			113	0	0	0					113	0	1.12139	0.560697				113
114	1	0	0	0	0	0	0	0	0	0	0	0	0	1			114	1.3	0.316228	0.223607	0.583095	0	0.984886	2.59615	0.412311	0.223607	0	0.447214	0	0	0.316228			114	0	0	0					114	0	1.92442	0.96221				114
115	1	0	0	0	0	0	0	0	0	0	0	0	0	1			115	0.8	0.1	0.1	1.04403	0.1	0.141421	1.5	0.5	0.282843	0.3	0.8544	0	0.282843	0.282843			115	0	0	0					115	0.316228	0.927181	0.621704				115
116	1	0	0	0	0	0	0	0	0	0	0	0	0	1			116	0.5	0.141421	0.1	0.2	0	0.5	0.921954	0	0	0.1	1.7088	0	0	0.1			116	0	0	0					116	0	0.619448	0.309724				116
117	1	0	0	0	0	0	0	0	0	0	1	0	0	2			117	0.316228	0.223607	0.1	0.316228	0	0.316228	0.141421	0.1	0.316228	0.1	0.943398	0	0	0.141421			117	0	0	0					117	0.4	0.117137	0.258568				117
118	1	1	0	0	0	0	0	0	0	0	1	0	0	3			118	0.5	0.447214	0.316228	0.1	0.1	1.52971	0.223607	0.1	0.1	0.141421	5.87282	0	0.223607	0.223607			118	1	0	1					118	0	0.532474	0.266237				118
119	1	1	0	0	0	0	0	0	0	0	1	0	0	3			119	0.1	0.4	0.2	0.223607	0	1.64924	0.824621	0	0.5	0.1	1.52643	0	0.2	0.2			119	1	0	1					119	0	0.184	0.092				119
120	1	1	0	0	0	0	0	0	0	0	1	0	0	3			120	0	0	0.1	0.565685	0.1	0.640312	0.632456	0	0.282843	0	1.02956	0	0	0.1			120	1	0	1					120	0.1	0.154	0.127				120
121	1	1	0	0	0	0	1	0	0	0	1	0	0	4			121	0	0.806226	0	0.1	0	0.5	1.11803	0	0	0	0.141421	0	0	0			121	1	0	1					121	0	0.2	0.1				121
122	1	1	0	0	0	0	0	0	0	0	1	0	0	3			122	0	0.948683	0	0.1	0.3	0.943398	2.28035	0	0.360555	0.1	0.72111	0.316228	0	0.3			122	1	0	1					122	0	0.183619	0.0918096				122
123	1	1	0	0	0	0	0	0	0	0	1	0	0	3			123	0	0.5	0	0	0.223607	0.3	0.67082	0	0	0	0.7	0.360555	0	0			123	1	0	1					123	0	0.474236	0.237118				123
124	1	0	0	0	0	0	0	0	0	0	1	0	0	2			124	0.316228	0.223607	0.141421	0.141421	0	0.728011	1.38924	0	0.360555	0	1.61245	0	0	0.141421			124	0	0	0					124	0	0.271765	0.135882				124
125	1	0	0	0	0	0	0	0	0	0	0	0	0	1			125	0.1	0.316228	0.141421	0	0.141421	0.223607	1.7088	0	0	0	2.86356	0	0	0.1			125	0	0	0					125	0	0.604546	0.302273				125
126	1	0	0	0	0	0	0	0	0	0	0	0	0	1			126	0.282843	0.1	0.1	0.2	0.1	0.1	0.509902	0	0	0	0.424264	0	0	0.1			126	1	0	1					126	0	0.112	0.056				126
127	1	0	0	0	0	0	0	0	0	0	0	0	0	1			127	0.282843	0.282843	0.1	0.1	0.3	0.1	0.282843	0.1	0.141421	0	0.1	0	0	0.1			127	1	0	1					127	0	0.055	0.0275				127
128	1	0	0	0	0	0	0	0	0	0	0	0	0	1			128	0	0.360555	0.3	0.223607	0.1	0.223607	0.223607	0	0	0	0.2	0	0	0.1			128	1	0	1					128	0	0.311005	0.155502				128
129	1	0	0	0	0	0	0	0	0	0	0	0	0	1			129	0	0.223607	0.2	0.7	0.141421	0	0.728011	0	0	0	0.632456	0	0.1	0.1			129	1	0	1					129	0	0.465626	0.232813				129
130	1	0	0	0	0	0	0	0	0	0	0	0	0	1			130	0	0.1	0.360555	0.447214	0.3	0.632456	0.447214	0.1	0	0	0.316228	0	0.141421	0.141421			130	1	0	1					130	0	0	0				130
131	1	0	0	0	0	0	0	0	0	0	0	0	0	1			131	0.538516	0	0.5	1.13137	0.1	0.2	0.316228	0.424264	0.1	0	0.538516	0	0	0.2			131	1	0	1					131	0	0	0				131
132	1	0	0	0	0	0	0	0	0	0	0	0	1	2			132	0.360555	0.223607	0.1	0.761577	0.1	0.3	0.424264	0.1	0.2	0.223607	0.5	0	0	0.223607			132	1	0	1					132	0	0.216233	0.108117				132
133	1	0	0	0	0	0	0	0	0	0	0	0	1	2			133	0.640312	0.282843	0.2	1.90263	0	0.538516	0.141421	0	0	0.2	0	0.4	0	0.2			133	0	0	0					133	0	0.201868	0.100934				133
134	1	0	0	0	0	0	0	0	0	0	0	0	1	2			134	0.1	0.1	0.3	0.4	0.2	0.1	0	0.5	0	0.1	0.2	0	0	0.1			134	0	0	0					134	0	0.301258	0.150629				134
135	1	0	0	0	0	0	0	0	0	0	0	0	1	2			135	0	0.223607	0	0.223607	0.1	0.761577	0.509902	0	0	0.141421	1.61245	0.424264	0	0.141421			135	1	0	1					135	0.1	0.129512	0.114756				135
136	1	0	0	0	0	0	0	0	0	0	0	0	1	2			136	0	0.565685	0.1	0.282843	0.1	0.632456	0.565685	0	0	0.2	0.282843	0	0	0.1			136	1	0	1					136	0	1.8075	0.903751				136
137	1	0	0	0	0	0	0	0	0	0	0	0	1	2			137	0	0.412311	0.1	0.2	0.282843	0.447214	1.36015	0.141421	0.1	0.2	0	0	0	0.141421			137	1	0	1					137	0	0.593534	0.296767				137
138	1	0	0	0	0	0	0	0	0	0	0	0	1	2			138	0.1	0.360555	0.1	0.316228	0	0.7	0.223607	0	0.141421	0.141421	0	0.3	0	0.141421			138	1	0	1					138	0	0.713261	0.356631				138
139	1	0	0	0	0	0	0	0	0	0	0	0	1	2			139	0	0.316228	0.223607	0.223607	0	0.2	0.9	0	0.412311	0.1	0	0.1	0.141421	0.141421			139	1	0	1					139	0	0.3	0.15				139
140	1	0	0	0	0	0	0	0	0	0	0	0	1	2			140	0	0.1	0.141421	0.4	0.2	0	0.316228	0.223607	0.223607	0	0	0.2	0	0.141421			140	1	0	1					140	0.583095	0.916419	0.749757				140
141	1	0	0	0	0	0	0	1	0	0	0	0	1	3			141	0.316228	0.632456	0.2	0.316228	0	0.640312	0.2	0.1	0	0.1	0.5	0	0	0.2			141	1	0	1					141	0	1.288	0.644				141
142	1	1	0	0	0	0	0	1	0	0	0	0	1	4			142	0.316228	0.824621	0.141421	0	0	0.223607	0.316228	0	0.316228	0.1	0	0	0	0.1			142	1	1	2					142	0.141421	2.0164	1.07891				142
143	1	1	1	0	0	0	0	1	0	0	0	0	1	5			143	0	0.447214	0.316228	0.1	0	0.2	0.1	0.141421	0.1	0	0	0	0	0.1			143	1	1	2					143	0.412311	1.57475	0.993531				143
144	1	1	1	0	0	0	1	1	0	1	0	0	1	7			144	0	0.806226	0.223607	0.223607	0.2	0.1	0.424264	0	0	0.1	0.282843	0.1	0.509902	0.2			144	1	1	2					144	0.1	0.266475	0.183238				144
145	1	1	1	0	0	0	1	1	0	0	0	0	1	6			145	0	0.412311	0.3	0.223607	0.1	0.1	0.412311	0	0.1	0	0.2	0	0.141421	0.1			145	1	1	2					145	0.781025	0.35618	0.568602				145
146	1	1	1	0	1	0	1	1	0	0	0	0	1	7			146	0.2	1.65529	0.2	0.1	0.223607	0.1	1.26491	0.2	0.223607	0.2	0.360555	1.26491	0.223607	0.223607			146	1	1	2					146	0.447214	1.59055	1.01888				146
147	1	1	1	0	1	0	0	1	0	0	0	0	1	6			147	0	0.412311	0.223607	0.412311	0.360555	0.223607	0.509902	0.1	0.447214	0.1	0.282843	0.6	0	0.282843			147	1	1	2					147	0.1	1.79279	0.946396				147
148	1	1	0	0	1	0	1	1	0	0	0	0	1	6			148	0	0.2	0.282843	0.141421	0.2	0.3	0.447214	0	0.2	0	0	0	0.1	0.141421			148	1	1	2					148	0	1.22066	0.610328				148
149	1	0	0	0	1	0	1	1	0	0	0	0	1	5			149	0	0.824621	0.1	0.583095	0.316228	0.2	0.583095	0.2	0.360555	0.316228	0.360555	0	0.141421	0.316228			149	1	1	2					149	0.583095	2.40832	1.49571				149
150	1	0	0	0	0	0	1	1	0	0	1	0	1	5			150	0.1	0.316228	0.1	0.848528	0.67082	0.141421	0.447214	0	1.11803	0.141421	0.1	0.4	0.316228	0.316228			150	1	1	2					150	0	1.86815	0.934077				150
151	1	0	0	0	0	0	1	1	0	0	1	0	1	5			151	0	0.640312	0.1	0.223607	0.141421	0.509902	0.316228	0	0.316228	0.141421	1.50333	0.6	0.223607	0.223607			151	0	1	1					151	0.1	0.223607	0.161803				151
152	1	0	0	0	0	0	0	1	0	0	1	0	1	4			152	0.141421	1.9799	0.2	1.43178	0	0.223607	1.00499	0	0.223607	0.1	1.11803	0.316228	0	0.223607			152	0	1	1					152	0.608276	0.4	0.504138				152
153	0	0	0	0	0	0	0	1	0	0	0	0	1	2			153	0.1	0.67082	0.141421	0.282843	0.1	0.424264	0.894427	0	0.1	0.1	0.360555	0	0	0.1			153	0	1	1					153	0	0.67082	0.33541				153
154	0	0	0	0	0	0	0	1	0	0	0	0	1	2			154	0	0.223607	0.1	0	0	0	1.17047	0	0.2	0	1.30384	0.2	0.1	0.1			154	0	1	1					154	0.141421	1.2	0.670711				154
155	0	0	0	0	0	0	0	1	0	0	0	0	1	2			155	0	0.5	0.223607	0	0	0.2	0.424264	0	0	0	1.0198	0.447214	0	0			155	0	0	0					155	0	0.640312	0.320156				155
156	0	0	0	0	0	0	0	0	0	0	0	0	0	0			156	0	0.632456	0.223607	0	0.1	0.223607	0.316228	0	0.2	0.141421	0.141421	0.223607	0	0.141421			156	0	0	0					156	0	1.04403	0.522015				156
157	0	0	0	0	0	0	0	0	0	0	0	0	0	0			157	0.2	0.806226	0.223607	0	0	0.424264	0	0	0.223607	0	1.07703	0.1	0	0.1			157	0	0	0					157	0	0.141421	0.0707107				157
158	0	0	0	0	0	0	0	0	0	0	0	0	0	0			158	0	0.1	0.223607	0.412311	0.141421	0.282843	0.2	0	0.316228	0.1	0.989949	0	0	0.141421			158	0	0	0					158	0	0.761577	0.380789				158
159	0	0	0	0	0	0	0	0	0	0	0	0	0	0			159	0	0.1	0.223607	0	0.141421	0.412311	0.1	0	0	0.1	0.1	0.3	0	0.1			159	0	0	0					159	0	0.583095	0.291548				159
160	0	0	0	0	0	0	0	0	0	0	0	0	0	0			160	0	0.141421	0.141421	0.1	0.1	0.1	0.141421	0	0.1	0.1	0.141421	0	0	0.1			160	0	0	0					160	0	0.2	0.1				160
161	0	0	0	0	0	0	0	0	0	0	0	0	0	0			161	0	0.223607	0.1	0	0.2	0	0.3	0	0.1	0	0.447214	0.1	0	0.1			161	0	0	0					161	0.2	0.3	0.25				161
162	0	0	0	0	0	0	0	0	0	0	0	0	0	0			162	0	0.2	0.141421	0.2	0	0.728011	0.424264	0	0.141421	0	0.3	0.3	0	0.141421			162	0	0	0					162	0.141421	0	0.0707107				162
163	0	0	0	0	0	0	0	0	0	0	0	0	0	0			163	0	0.141421	0.223607	0.2	0	0.894427	0.6	0.2	0.360555	0	0.1	0.2	0	0.2			163	0	0	0					163	0	0.1	0.05				163
164	0	0	0	0	0	0	0	0	0	0	0	0	0	0			164	0	0	0.141421	0.2	0.141421	0.282843	0.282843	0.1	0.223607	0	0.223607	0.1	0	0.141421			164	0	0	0					164	0	0	0				164
165	0	0	0	0	0	0	0	0	0	0	0	0	0	0			165	0	0.1	0.223607	0.223607	0	0.316228	0.608276	0	0.316228	0	0	0	0	0			165	0	0	0					165	0	0.4	0.2				165
166	0	0	0	0	0	0	0	0	0	0	0	0	0	0			166	0	0.141421	0.316228	0.4	0.1	0.412311	0.608276	0.2	0.223607	0	0.1	0	0	0.141421			166	0	0	0					166	0	0.141421	0.0707107				166
167	0	0	0	0	0	0	0	0	0	0	0	0	0	0			167	0.424264	0.447214	0.360555	0.223607	0	0.1	2.21359	0	0.360555	0.1	0.282843	0.141421	0	0.223607			167	0	0	0					167	0	0.2	0.1				167
168	0	0	0	0	0	0	0	0	0	0	0	0	0	0			168	0	0.223607	0.316228	0.2	0	0.2	0.360555	0	0.707107	0.1	0.5	0.360555	0	0.2			168	0	0	0					168	0	0	0				168
169	0	0	0	0	0	0	0	0	0	0	0	0	0	0			169	0	0	0.316228	0	0	0.1	1.61245	0	0.781025	0	0	0.141421	0	0			169	0	0	0					169	0.1	0.1	0.1				169
170	0	0	0	0	0	0	0	0	0	0	0	0	0	0			170	0	0.223607	0.2	0	0	0.360555	3.228	0.1	0	0	0	0	0	0			170	0	0	0					170	0	0.1	0.05				170
171	0	0	0	0	0	0	0	0	0	0	0	0	0	0			171	0	0	0.2	0	0	0.5	2.34307	0	0.781025	0	0	0	0.282843	0			171	0	0	0					171	0	0.141421	0.0707107				171
172	0	0	0	0	0	0	0	0	0	0	0	0	0	0			172	0	0	0.1	0	0.1	0.1	0.223607	0	0.141421	0	1.58114	0.141421	0.223607	0.1			172	0	0	0					172	0	0.1	0.05				172
173	0	0	0	0	0	0	0	0	0	0	0	0	0	0			173	0	0	0.282843	0.141421	0	0.223607	0.223607	0	0.141421	0	0.424264	0	0	0			173	0	0	0					173	0	0.141421	0.0707107				173
174	0	0	0	0	0	0	0	0	0	0	0	0	0	0			174	0	0	0.2	0.1	0	0.141421	0.1	0	0.2	0	0.282843	0	0	0			174	0	0	0					174	0	0.3	0.15				174
175	0	0	0	0	0	0	0	0	0	0	0	0	0	0			175	0	0	0.1	0	0	0.2	0.2	0	0.360555	0	0.316228	0	0	0			175	0	0	0					175	0	0.2	0.1				175
176	0	0	0	0	0	0	0	0	0	0	0	0	0	0			176	0	0.1	0.3	0	0	0.3	0.509902	0	0.223607	0	0	0	0	0			176	0	0	0					176	0	0.4	0.2				176
177	0	0	0	0	0	0	0	0	0	0	0	0	0	0			177	0	0.1	0.223607	0	0.141421	0.2	0.1	0	0.141421	0	0.4	0	0	0.1			177	0	0	0					177	0	0.141421	0.0707107				177
178	0	0	0	0	0	0	0	0	0	0	0	0	0	0			178	0	0.1	0.1	0.223607	0	0.141421	0.412311	0	0.141421	0	0.2	0	0	0.1			178	0	0	0					178	0	0	0				178
179	0	0	0	0	0	0	0	0	0	0	0	0	0	0			179	0	0.141421	0.1	0	0	0.223607	0	0	0.2	0	ND	0	0	0			179	0	0	0					179	0.141421	0.1	0.120711				179
180	0	0	0	0	0	0	0	0	0	0	0	0	0	0			180																	180	0	0	0					180							180
[truncated: 34 more columns]

## Sheet: Sheet 8
Sheet 8.	Parameters of mass spawning event in S. intermedius 20 May of 2016, in Alekseev Bay
	Blue raws denote the beginning and the end of spawning in males, red raws denote the beginning and the end of spawning in females. The cells with figure "1" highlited by green color denote the presence of gamete clots on the aboral surface of males and females.
	Male spawning events																			Step length of males, cm																				Female spawning events					Step length of females, cm
Time, min	Male-1	Male-10	Male-11	Male-12	Male-13	Male-14	Male-2	Male-3	Male-4	Male-5	Male-6	Male-7	Male-8	Male-9	Dynamics of male spawning				Time, min	Male-1	Male-10	Male-11	Male-12	Male-13	Male-14	Male-2	Male-3	Male-4	Male-5	Male-6	Male-7	Male-8	Male-9	Median step length					Time, min	Female-1					Time, min	Female-1
1	0	0	0	0	0	0	0	0	0	0	0	0	0	0	0				1																				1	0					1
2	0	0	0	0	0	0	0	0	0	0	0	0	0	0	0				2	0.2	0.123223	0	0	0.1	0	0	0.223607	0.316228	0	0.6	0	0	0.223607	0.05					2	0					2	0.2
3	0	0	0	0	0	0	0	0	0	0	0	0	0	0	0				3	0.223607	0.072	0.2	0	0	0	0.223607	0	0.1	0.1	0.707107	0	0	0	0.036					3	0					3	0.223607
4	0	0	0	0	0	0	0	0	0	0	0	0	0	0	0				4	0.2	0.122642	0	0	0	0.1	0	0.1	0.1	0	0.3	0.223607	0	0.1	0.1					4	0					4	0.1
5	0	0	0	0	0	0	0	0	0	0	0	0	0	0	0				5	0.316228	0.25242	0.282843	0	0	0	0	0	0.360555	0	0	0	0.1	0	0					5	0					5	0.360555
6	0	0	0	0	0	0	0	0	0	0	0	0	0	0	0				6	0.282843	0.319075	0	0	0	0	0	0	0.1	0	0	0	0	0	0					6	0					6	0.2
7	0	0	0	0	0	0	0	0	0	0	0	0	0	0	0				7	0.282843	0	0.2	0	0	0	0	0	0.1	0	0.1	0	0	0	0					7	0					7	0
8	0	0	0	0	0	0	0	0	0	0	0	0	0	0	0				8	0.141421	0.1	0	0	0	0	0	0	0.223607	0.141421	0.141421	0	0	0	0					8	0					8	0.316228
9	0	0	0	0	0	0	0	0	0	0	0	0	0	0	0				9	0.1	0	0	0.141421	0	0	0	0	0	0	0	0	0	0	0					9	0					9	0.3
10	0	0	0	0	0	0	0	0	0	0	0	0	0	0	0				10	0.223607	0.18111	0.2	0	0	0.141421	0	0	0.1	0.223607	0.1	0	0	0	0.05					10	0					10	0.1
11	0	0	0	0	0	0	0	0	0	0	0	0	0	0	0				11	0.223607	0.151	0.360555	0	0	0.2	0	0.2	0.2	0	0	0	0	0.2	0.0755					11	0					11	0.1
12	0	0	0	0	0	0	0	0	0	0	0	0	0	0	0				12	0.223607	0.101	0.2	0	0	0	0	0	0.3	0.2	0	0	0	0	0					12	0					12	0.282843
13	0	0	0	0	0	0	0	0	0	0	0	0	0	0	0				13	0.141421	0	0.1	0	0	0	0	0	0.360555	0.223607	0	0	0.2	0	0					13	0					13	0
14	0	0	0	0	0	0	0	0	0	0	0	0	0	0	0				14	0.1	0	0.1	0	0	0	0	0	0.360555	0	0	0	0	0	0					14	0					14	0.2
15	0	0	0	0	0	0	0	0	0	0	0	0	0	0	0				15	0.282843	0.101	0.282843	0	0	0	0	0	0.360555	0	0	0	0	0	0					15	0					15	0.141421
16	0	0	0	0	0	0	0	0	0	0	0	0	0	0	0				16	0.1	0.111803	0.2	0	0	0.2	0	0	0.282843	0.1	0.1	0	0.316228	0	0.1					16	0					16	0.1
17	0	0	0	0	0	0	0	0	0	0	0	0	0	0	0				17	0.1	0.206155	0.1	0	0	0.1	0	0	0.761577	0	0	0	0.223607	0	0					17	0					17	0.1
18	0	0	0	0	0	0	0	0	0	0	0	0	0	0	0				18	0.1	0.251205	0.509902	0	0	0.608276	0	0	0.412311	0	0	0	0.141421	0	0					18	0					18	0.1
19	0	0	0	0	0	0	0	0	0	0	0	0	0	0	0				19	0.223607	0.367853	1.27279	0	0.447214	0	0	0	0.4	0	0.632456	0	0	0	0					19	0					19	0.223607
20	0	0	0	0	0	0	0	0	0	0	0	0	0	0	0				20	0.447214	0.181945	2.13776	0	0.1	0	0	0	0.1	0	0.2	0	0	0	0					20	0					20	0.141421
21	0	0	0	0	0	0	0	0	0	0	0	0	0	0	0				21	0.1	0	1.36015	0	0.640312	0	0	0	0.360555	0	0.1	0	0	0	0					21	0					21	0.509902
22	0	0	0	0	0	0	0	0	0	0	0	0	0	0	0				22	0.223607	0.320025	0.8544	0	0	0.1	0	0	0.223607	0	0.1	0	0	0	0					22	0					22	0.360555
23	0	0	0	0	0	0	0	0	0	0	0	0	0	0	0				23	0.223607	0.1	0.1	0	0	0.316228	0	0	0	0	0.72111	0	1.45602	0	0					23	0					23	0.4
24	0	0	0	0	0	0	0	0	0	0	0	0	0	0	0				24	0	0.354	0.360555	0	0	0	0	0	0.424264	0	0.5	0	0	0	0					24	0					24	0.7
25	0	0	0	0	0	0	0	0	0	0	0	0	0	0	0				25	0.360555	0.252	0.1	0	0.1	0	0	0	0.2	0	0.3	0	0.3	0	0.05					25	0					25	0.447214
26	0	0	0	0	0	0	0	0	0	0	0	0	0	0	0				26	0.141421	0.101	0.141421	0	0	0.1	0.2	0	0.632456	0	0.141421	0	0.67082	0	0.1005					26	0					26	0.905539
27	0	0	0	0	0	0	0	0	0	0	0	0	0	0	0				27	0.223607	0	0.1	0	0	0	0	0	0.67082	0	0.360555	0.2	0.1	0	0					27	0					27	1.41421
28	0	0	0	0	0	0	0	0	0	0	0	0	0	0	0				28	0.1	0.151	0.1	0	0	0.1	1.34164	0.3	0.3	0	0.316228	0	0	0.3	0.1					28	0					28	0.2
29	0	0	0	0	0	0	0	0	0	0	0	0	0	0	0				29	0.583095	0	0.141421	0	0	0	1.17047	0	0.447214	0	0.316228	1.34164	0	0	0					29	0					29	0
30	0	0	0	0	0	0	0	0	0	0	0	0	0	0	0				30	0.223607	0.1	0.141421	0	0	0	0.921954	0	0.282843	0	0.5	1.17047	0	0	0.05					30	0					30	0.141421
31	0	0	0	0	0	0	0	0	0	0	0	0	0	0	0				31	0.2	0.225397	0.2	0	0	0.424264	0.282843	0	0.1	0	0.360555	0.921954	0	0	0.15					31	0					31	0.223607
32	0	0	0	0	0	0	0	0	0	0	0	0	0	0	0				32	0.360555	0.304304	0.1	0	0	0.3	0.223607	0	0.223607	0	0	0.282843	0	0	0.05					32	0					32	0
33	0	0	0	0	0	0	0	0	0	0	0	0	0	0	0				33	0.1	0.101	0.223607	0	0	0.1	0	0	0.8544	0	0	0.223607	0	0	0					33	0					33	0.1
34	0	0	0	0	0	0	0	0	0	0	0	0	0	0	0				34	0.1	0.14213	0.223607	0	0.223607	0	0.141421	0	0.412311	0	0.223607	0	0	0	0.05					34	0					34	0.1
35	0	0	0	0	0	0	0	0	0	0	0	0	0	0	0				35	0.1	0.101	0.3	0	0	0	0	0	0.424264	0	0	0.141421	0	0	0					35	0					35	0.1
36	0	0	0	0	0	0	0	0	0	0	0	0	0	0	0				36	0.223607	0.051	0.1	0	0	0	0.1	0	0.2	0	0	0	0	0	0					36	0					36	0
37	0	0	0	0	0	0	0	0	0	0	0	0	0	0	0				37	0.141421	0.101	0.316228	0	0	0	0	0	0.565685	0	0	0.1	0	0	0					37	0					37	0.360555
38	0	0	0	0	0	0	0	0	0	0	0	0	0	0	0				38	0.1	0.05	0	0	0	0	0	0.3	0.316228	0	0	0	0	0.3	0					38	0					38	0.5
39	0	0	0	0	0	0	0	0	0	0	0	0	0	0	0				39	0.223607	0.111803	0.141421	0	0	0	0.316228	0	0.141421	0	0.1	0	0	0	0					39	0					39	0.141421
40	0	0	0	0	0	0	0	0	0	0	0	0	0	0	0				40	0.141421	0.1	0.538516	0	0	0	0	0	1.00499	0	0	0.316228	0	0	0					40	0					40	0.1
41	0	0	0	0	0	0	0	0	0	0	0	0	0	0	0				41	0.141421	0	0.412311	0	0	0	0	0	0.806226	0	0.3	0	0	0	0					41	0					41	0.360555
42	0	0	0	0	0	0	0	0	0	0	0	0	0	0	0				42	0.223607	0.28426	0.282843	0	0	0	0	0	0.608276	0.282843	0	0	0	0	0					42	0					42	0.608276
43	0	0	0	0	0	0	0	0	0	0	0	0	0	0	0				43	0.223607	0.14213	0.2	0	0.2	0	0	0	0.3	0.1	0	0	0	0	0					43	0					43	0.316228
44	0	0	0	0	0	0	0	0	0	0	0	0	0	0	0				44	0.1	0.051	0.316228	0	0.141421	0	0	0	0.2	1.33417	0	0	0	0	0					44	0					44	0
45	0	0	0	0	0	0	0	0	0	0	0	0	0	0	0				45	0	0.181945	0.316228	0	0	0	0	0	0	0	0	0	0	0	0					45	0					45	0.223607
46	0	0	0	0	0	0	0	0	0	0	0	0	0	0	0				46	0.1	0.28426	0.141421	0	0.2	0	0	0	0.2	0	0	0	0	0	0					46	0					46	0.1
47	0	0	0	0	0	0	0	0	0	0	0	0	0	0	0				47	0	0.225397	0.316228	0	0	0	0	0	0	0	0	0	0.1	0	0					47	0					47	0.1
48	0	0	0	0	0	0	0	0	0	0	0	0	0	0	0				48	0	0.272046	0.3	0	0	0	0	0.1	0.1	0	0	0	0.316228	0.1	0					48	0					48	0.223607
49	0	0	0	0	0	0	0	0	0	0	0	0	0	0	0				49	0.1	0.272046	0.5	0	0	0	0	0	0.223607	0	0	0	0	0	0					49	0					49	0.223607
50	0	0	0	0	0	0	0	0	0	0	0	0	0	0	0				50	0.2	0.1	0.223607	0	0.1	0	0	0	0.223607	0	0	0	0	0	0					50	0					50	0.2
51	0	0	0	0	0	0	0	0	0	0	0	0	0	0	0				51	0.2	0.152	0.1	0	0.2	0	0.67082	0	0.6	0	0	0	0	0	0					51	0					51	0.2
52	0	0	0	0	0	0	0	0	0	0	0	0	0	0	0				52	0	0.181945	0.1	0	0	0	0.5	0	0.728011	0.1	0	0.67082	0	0	0					52	0					52	0.1
53	0	0	0	0	0	0	0	0	0	0	0	0	0	0	0				53	0.1	0.14213	0.223607	0	0	0.1	0	0	0.1	0.4	0	0.5	0.1	0	0.1					53	0					53	0.223607
54	0	0	0	0	0	0	0	0	0	0	0	0	0	0	0				54	0.3	0.224056	0.5	0	0	0	0	0	0.447214	0.2	0	0	0	0	0					54	0					54	0.1
55	0	0	0	0	0	0	0	0	0	0	0	0	0	0	0				55	0.2	0.112254	0.316228	0	0	0	0	0	0.2	0	0	0	0	0	0					55	0					55	0.223607
56	0	0	0	0	0	0	0	0	0	0	0	0	0	0	0				56	0.1	0.1	0.223607	0	0	0	0.2	0	0.1	0.2	0	0	0	0	0					56	0					56	0.2
57	0	0	0	0	0	0	0	0	0	0	0	0	0	0	0				57	0.141421	0.18111	0.2	0	0	0	0.424264	0	0.72111	0	0	0.2	0	0	0					57	0					57	0.1
58	0	0	0	0	0	0	0	0	0	0	0	0	0	0	0				58	0.141421	0.251205	0	0	0	0	0	0	0.223607	0	0	0.424264	0	0	0					58	0					58	0.2
59	0	0	0	0	0	0	0	0	0	0	0	0	0	0	0				59	0.1	0.539262	0.141421	0	0	0	0	0	0.412311	0	0.223607	0	0	0	0					59	0					59	0.2
60	0	0	0	0	0	0	0	0	0	0	0	0	0	0	0				60	0.1	0.316545	0.141421	0	0	1.23693	0	0	0.761577	0	0	0	0	0	0					60	0					60	0.282843
61	0	0	0	0	0	0	0	0	0	0	0	0	0	0	0				61	0.2	0.1	0.1	0	0	0	0	0	0.2	0	0	0	0	0	0					61	0					61	0.223607
62	0	0	0	0	0	0	0	0	0	0	0	0	0	0	0				62	0.282843	0.316545	0.509902	0	0	0	0	0	0	0.360555	0.3	0	0	0	0					62	0					62	0.316228
63	0	0	0	0	0	0	0	0	0	0	0	0	0	0	0				63	0.447214	0.224056	0.4	0	0	0	0	1.0198	0.316228	0.5	0	0	0	1.0198	0.112028					63	0					63	0.141421
64	0	0	0	0	0	0	0	0	0	0	0	0	0	0	0				64	0	0.18111	0.223607	0	0	0	0	0	0.1	0	0	0	0	0	0					64	0					64	0.3
65	0	0	0	0	0	0	0	0	0	0	0	0	0	0	0				65	0.2	0.1	0.2	0	0	0	0	0.1	0.1	0	0	0	0	0.1	0					65	0					65	0.316228
66	0	0	0	0	0	0	0	0	0	0	0	0	0	0	0				66	0.2	0.101	0.2	0	0	0	0	0.1	0	0	0	0	0	0.1	0					66	0					66	0.223607
67	0	0	0	0	0	0	0	0	0	0	0	0	0	0	0				67	0	0.14213	0.1	0	0	0	0	0.2	0.1	0.1	0	0	0.3	0.2	0.05					67	0					67	0.1
68	0	0	0	0	0	0	0	0	0	0	0	0	0	0	0				68	0.223607	0.1	0.141421	0	0.3	0	0	0	0.3	0	0	0	0	0	0					68	0					68	0.412311
69	0	0	0	0	0	0	0	0	0	0	0	0	0	0	0				69	0.1	0.101	0.141421	0	0.2	0	0	0.360555	0.2	0	0.1	0	0.447214	0.360555	0.1005					69	0					69	0.223607
70	0	0	0	0	0	0	0	0	0	0	0	0	0	0	0				70	0.2	0.181945	0.223607	0	0	0	0	0.11136	0	0	0	0	0.3	0.11136	0					70	0					70	0.316228
71	0	0	0	0	0	0	0	0	0	0	0	0	0	0	0				71	0.2	0.2064	0.3	0	0	0.1	0	0.453647	0.1	0	0	0	0	0.453647	0.05					71	0					71	0
72	0	0	0	0	0	0	0	0	0	0	0	0	0	0	0				72	0.2	0.403238	0	0	0	0	0	0.2	0	0	0.1	0	0	0.2	0					72	0					72	0.282843
73	0	0	0	0	0	0	0	0	0	0	0	0	0	0	0				73	0.2	0.304138	0.2	0	0	0	0	0.3	0.316228	0	0	0	0	0.3	0					73	0					73	0.282843
74	0	0	0	0	0	0	0	0	0	0	0	0	0	0	0				74	0	0.206155	0.282843	0	0	0	0	0.212565	0.141421	0	0	0	0	0.212565	0					74	0					74	0
75	0	0	0	0	0	0	0	0	0	0	0	0	0	0	0				75	0.141421	0.181945	0.223607	0	0	0.3	0	0	0.141421	0	0	0	0.2	0	0					75	0					75	0.360555
76	0	0	0	0	0	0	0	0	0	0	0	0	0	0	0				76	0.141421	0.2064	0.1	0	0	1.06301	0	0.308287	0.141421	0	0	0	0	0.308287	0.05					76	0					76	0.1
77	0	0	0	0	0	0	0	0	0	0	0	0	0	0	0				77	0	0.251205	0.3	0	0	0.316228	0	0.3	0.141421	0	0	0	0	0.3	0					77	0					77	0.316228
78	0	0	0	0	0	0	0	0	0	0	0	0	0	0	0				78	0	0.225397	0.2	0	0	0.447214	0	0.4	1	0	0	0	0	0.4	0					78	0					78	0.141421
79	0	0	0	0	0	0	0	0	0	0	0	0	0	0	0				79	0.223607	0.1	0.1	0	0	0.1	0	0.2	0	0	0	0	0.1	0.2	0.05					79	0					79	0.1
80	0	0	0	0	0	0	0	0	0	0	0	0	0	0	0				80	0.282843	0.336309	0.1	0	0	0	0	0.81268	0.1	0	0	0	0	0.81268	0					80	0					80	0.1
81	0	0	0	0	0	0	0	0	0	0	0	0	0	0	0				81	0	0.304138	0.1	0	0	0	0	0	0.360555	0	0	0	0.4	0	0					81	0					81	0.412311
82	0	0	0	0	0	0	0	0	0	0	0	0	0	0	0				82	0.565685	0.102	0.141421	0	0	0.2	0	0.332339	0.1	0	0	0	0.223607	0.332339	0.101					82	0					82	0.3
83	0	0	0	0	0	0	0	0	0	0	0	0	0	0	0				83	0.1	0.112254	0	0	0	0.984886	0.806226	0.2	0	0	0	0	0	0.2	0					83	0					83	0.8
84	0	0	0	0	0	0	0	0	0	0	0	0	0	0	0				84	0.223607	0.112254	0.223607	0	0	2.5632	0.141421	0.3	0.316228	0	0	0.806226	0.1	0.3	0.182514					84	0					84	1.94165
85	0	0	0	0	0	0	0	0	0	0	1	0	0	0	1				85	0.3	0.1	0.1	0	0	0.282843	0.583095	0	0.223607	0	0	0.141421	2.2561	0	0.1					85	0					85	3.30151
86	0	0	0	0	0	0	0	0	0	0	1	0	1	0	2				86	0.282843	0.051	0.141421	0	0.223607	0.3	0.2	0.174496	0.3	0	0	0.583095	0.8	0.174496	0.187248					86	0					86	2.5807
87	0	0	0	0	0	0	0	0	0	0	0	0	1	0	1				87	0.412311	0.14213	0.282843	0	0.316228	2.14009	0.412311	0.1	0	0	0	0.2	2.06155	0.1	0.171065					87	0					87	0.538516
88	0	0	0	0	0	0	0	0	0	0	0	0	1	0	1				88	1.04403	0.497016	0.509902	0	0.141421	0.316228	0.538516	0	0.223607	0	0	0.412311	0.6	0	0.269917					88	0					88	1.6
89	0	0	0	0	0	0	0	0	0	1	0	0	1	0	2				89	0.8544	0.53415	0.3	0	0	0.360555	0.1	0	0.509902	0	0.6	0.538516	0.632456	0	0.330278					89	0					89	2.64764
90	0	0	0	0	0	0	0	0	0	0	1	0	1	0	2				90	0.608276	0.181945	0.282843	0	0.360555	1.96469	0.538516	0.7	0.2	0	0	0.1	0.640312	0.7	0.321699					90	0					90	2
91	0	0	0	0	0	0	0	1	0	1	1	0	1	0	4				91	0.4	0.320025	0.223607	0	0.424264	1.83576	0.223607	0.332339	0.67082	0	1.2	0.538516	1.7088	0.332339	0.366169					91	0					91	2.90689
92	0	0	0	0	0	0	0	1	0	0	1	0	1	0	3				92	0.943398	0.272046	0.412311	0	0	1.52643	0.538516	0.072	0.1	0	1.52315	0.223607	3.34215	0.072	0.247826					92	0					92	2.06155
93	0	0	0	0	0	0	0	0	0	0	1	0	1	0	2				93	0.2	0.336309	0.223607	0	0.316228	1.92354	0.1	0	0.412311	0	1.10454	0.538516	0.640312	0	0.269917					93	0					93	0.447214
94	0	0	0	0	0	0	0	0	0	0	1	0	1	0	2				94	0.2	0.181945	0.2	0	0.2	3.90512	0	0.071	0.360555	0.2	0.7	0.1	0.824621	0.071	0.2					94	0					94	1.11803
95	0	0	0	0	0	0	0	0	0	0	1	0	1	0	2				95	0.360555	0.2	0.360555	0	0	0.781025	0	0.1	0.223607	0	0.3	0	0.824621	0.1	0.15					95	0					95	1.04403
96	0	0	0	0	0	0	0	0	0	0	1	0	1	0	2				96	0.316228	0.051	0.3	0	0.509902	1.36015	0	0	0.1	0	1.11803	0	1.74642	0	0.0755					96	0					96	2.16333
97	0	0	0	0	0	0	0	0	0	0	1	0	1	0	2				97	0.4	0.412554	0.2	0.1	0.583095	0.707107	1.61555	0	0.282843	0	0.806226	0	0	0	0.241421					97	0					97	0.608276
98	1	0	0	0	0	0	0	0	0	0	1	0	1	0	3				98	1.26491	0.618709	0.223607	0.223607	0.5	0.4	0.989949	0	0.2	0	0.1	1.61555	0.5	0	0.311803					98	0					98	0.447214
99	1	0	0	0	0	0	0	0	0	0	1	0	1	0	3				99	2	0.426391	0	0.282843	0.1	1.50333	1.22066	0	0.3	0	0	0.989949	1.48661	0	0.291421					99	0					99	0.806226
100	1	0	0	0	0	0	0	1	0	0	1	0	1	0	4				100	0.707107	0.367853	0.223607	1.0198	1.14018	2.33452	2.31948	0	0.360555	0	0	1.22066	0.4	0	0.383927					100	0					100	1.22066
101	1	0	0	0	0	0	0	1	0	0	1	0	1	0	4				101	2.80179	0.416192	0.360555	0.360555	0	1.56205	1.62788	0	0.1	0	1.07703	2.31948	0.824621	0	0.388374					101	0					101	0.360555
102	1	0	0	0	0	0	0	1	0	0	1	0	1	0	4				102	1.86011	0.181945	0.4	0.509902	0	0.1	1.61245	0	0.223607	0	1.23693	1.62788	0.860233	0	0.311803					102	0					102	0.316228
103	1	0	0	0	0	0	0	1	0	1	1	0	1	0	5				103	4.96488	0.253	0.4	0	0.282843	0.583095	4.5607	0	0.1	0	1.39284	1.61245	1.44222	0	0.341421					103	0					103	0.9
104	1	0	0	0	0	0	0	1	0	0	1	0	0	0	3				104	1.17047	0.320025	0.282843	0	0.1	0.5	4.30813	0.849586	0.360555	0	0.860233	4.5607	0.223607	0.849586	0.430278					104	0					104	0.316228
105	1	0	0	0	0	0	0	0	0	0	1	0	0	0	2				105	1.71172	0.181945	0.141421	0.282843	0	0.806226	1.62788	0.174496	0.2	0	0.447214	4.30813	0.5	0.174496	0.241421					105	0					105	0.424264
106	1	0	0	0	0	0	0	0	0	0	1	0	0	0	2				106	2.00998	0.14213	0.360555	0.67082	0	0.8544	0.837673	0.1	0.360555	0.1	0	1.62788	0.141421	0.1	0.251343					106	0					106	0.282843
107	1	0	0	0	0	0	0	0	0	0	1	0	0	0	2				107	0.728011	0.2064	0.67082	0.1	0	1.2083	0.733005	0.1	0.141421	0	0.1	0.837673	1.48661	0.1	0.173911					107	0					107	0.2
108	1	0	0	1	0	0	0	1	0	1	1	0	0	0	5				108	1.34164	0.101	0.67082	0	0	0.2	1.30384	0.143	0.316228	0.282843	0.2	0.733005	0.640312	0.143	0.241421					108	0					108	1.11803
109	1	0	0	1	0	0	0	1	0	1	1	0	1	0	6				109	0.2	0.272046	0.447214	0	0.2	1.36015	1.11803	0.466314	0.412311	0.316228	0.72111	1.30384	0.509902	0.466314	0.456764					109	0					109	1.06301
110	1	0	0	1	0	0	0	1	0	1	1	0	1	0	6				110	3.56931	0.225397	0.538516	1.20416	0	0	2.41868	0.576017	0.2	0.5	0.1	1.11803	0.728011	0.576017	0.557267					110	1					110	1.48661
111	1	0	0	1	0	0	0	1	0	0	1	0	1	0	5				111	1.04403	0.206155	0.1	0	0.2	0.282843	0.848528	0.072	0.2	0.3	0.1	2.41868	1.30384	0.072	0.203078					111	1					111	1.36015
112	1	0	0	1	0	0	0	1	0	0	1	0	1	0	5				112	0.7	0.206155	0.6	0	0.3	1.50333	1.61245	0.414483	0.223607	0	0.781025	0.848528	1.0198	0.414483	0.507241					112	1					112	0.860233
113	1	0	0	1	0	0	0	1	0	0	1	1	1	0	6				113	1.07703	0.224056	0.316228	0	0.583095	0.848528	0.905539	1.26715	1.26491	0	1.61245	1.61245	0	1.26715	0.877033					113	1					113	1.7088
114	1	0	0	1	1	0	0	1	0	0	1	1	1	0	7				114	1.17047	0.111803	1.56525	0.728011	0	1.78045	0.921954	0	0.806226	0.316228	1.48661	0.905539	0.223607	0	0.767118					114	1					114	0.948683
115	1	0	0	1	1	0	0	1	0	0	1	1	1	0	7				115	0.3	0.18111	0.282843	0.8544	0.583095	1.48661	1.82483	1.42127	0.989949	1.31529	1.11803	0.921954	1.28062	1.42127	1.05399					115	1					115	2.06155
116	1	0	0	1	1	0	0	1	0	0	1	1	1	0	7				116	0.5	0	1.14018	0.9	0.5	2.77308	2.44131	0	0.707107	0.360555	0.9	1.82483	2.55539	0	0.803553					116	1					116	1.55242
117	1	0	0	1	1	1	0	1	1	1	1	1	1	0	10				117	1.14018	0.224056	0.223607	0.538516	1.5	4.45533	0.761577	0.5	0.223607	0.781025	0.894427	2.44131	0.412311	0.5	0.650047					117	1					117	0.761577
118	1	0	0	1	0	1	0	1	1	1	1	1	1	0	9				118	2.01246	0.14213	1.14018	0.3	0.894427	2.37697	3.38378	2.14009	1.61555	0.316228	2.83019	0.761577	0.141421	2.14009	1.37786					118	1					118	1.04403
119	1	0	0	1	0	1	0	1	1	1	1	1	1	1	10				119	1.13137	0.101	0.5	0.5	2.5807	1.3	0.538516	1.5	0.509902	1.43178	2.12132	3.38378	2.05913	1.5	1.36589					119	1					119	0.781025
120	1	0	0	1	0	0	0	1	1	1	1	1	1	0	8				120	2.13776	0.304138	1.06301	1.42127	0.447214	1.92094	0	2.6	1.5	0.360555	0.223607	0.538516	1.2	2.6	1.13151					120	1					120	0.6
121	1	0	0	1	1	0	0	1	1	1	1	0	1	1	9				121	3.61248	0.605826	0.72111	0.8544	0	3.38378	0	2.2	3.33017	0	0.5	0	0.4	2.2	0.663468					121	1					121	0.360555
122	1	0	0	1	1	0	0	1	1	1	1	0	1	0	8				122	0.608276	0.225397	0.538516	0.707107	1.02956	2.02485	0.316228	0.921954	1.13137	0.509902	0.806226	0	0.2	0.921954	0.657692					122	1					122	0.360555
123	1	0	0	1	1	1	0	1	1	1	1	0	1	0	9				123	0.608276	0.224	0.806226	1.11803	0	0.360555	0.7	1.80278	1.51327	0.447214	0.860233	0.316228	0.1	1.80278	0.654138					123	1					123	0.141421
124	1	0	0	1	0	1	0	1	1	1	1	1	1	0	9				124	0.412311	0.2	0.72111	1.7	0.943398	1.17047	0.860233	2.14009	0.72111	0.3	0.921954	0.7	0.921954	2.14009	0.891093					124	1					124	0.360555
125	1	0	0	1	0	0	0	1	1	1	0	0	1	0	6				125	0.5	0.808703	0.5	2.64197	1.11803	0	1.56525	0.67082	0.905539	0.360555	0.761577	0.860233	0.894427	0.67082	0.78514					125	1					125	0.538516
126	1	0	0	0	1	1	0	1	1	1	0	1	1	0	8				126	0.5	0.161645	0.538516	0.7	1.28062	0	0.640312	0	0.3	0.316228	0.984886	1.56525	0.509902	0	0.504951					126	1					126	1.06301
127	1	1	0	1	0	1	0	1	1	1	0	1	1	0	9				127	1.56205	0.127	0.360555	0.905539	2.14009	1.00499	3.8833	0.447214	0.223607	0	0.67082	0.640312	1.4	0.447214	0.655566					127	1					127	0.360555
128	1	1	0	1	0	0	0	1	1	1	0	1	1	1	9				128	0.282843	0.302926	0.3	0.72111	0.5	3.48281	0.860233	0.8544	0.360555	0.141421	4.74131	3.8833	0.424264	0.8544	0.610555					128	1					128	0.538516
129	1	1	0	1	0	0	0	1	1	0	1	0	0	1	7				129	0.8	0.150147	0.360555	0.2	0.8544	0.583095	1.36015	2.06155	0.824621	0	0.316228	0.860233	3.91152	2.06155	0.812311					129	1					129	0.565685
130	1	1	0	1	0	1	0	1	1	0	1	0	0	1	8				130	0.2	0.6	0.3	1.83576	1.34536	2.23607	0.8544	0.424264	0.583095	0.3	0.67082	1.36015	0	0.424264	0.591548					130	1					130	0.282843
131	1	0	0	1	0	1	0	1	1	1	1	0	0	1	8				131	0.141421	1.50481	0.447214	0.141421	0.67082	0	1	0.860233	0.447214	0	0.640312	0.8544	2.3	0.860233	0.655566					131	1					131	0.316228
132	1	1	0	1	0	0	0	1	1	1	1	0	0	1	8				132	0.412311	1.078	0.412311	1.06301	1.17047	1.06301	1.22066	0.316228	0.509902	0.282843	0.894427	1	0.728011	0.316228	0.811219					132	1					132	0.860233
133	1	1	0	1	0	0	1	1	1	1	1	1	0	1	10				133	0.3	0.547814	0.316228	0.5	1.253	0.1	0.424264	0	0.447214	0.223607	0.583095	1.22066	1.84391	0	0.435739					133	1					133	0.67082
134	1	1	0	1	0	0	1	1	1	1	1	1	1	1	11				134	0.1	0.525624	0.3	0.948683	1.70294	0.7	0.583095	0.360555	0.412311	0.6	2.43516	0.424264	2.20227	0.360555	0.55436					134	1					134	0.921954
135	1	1	0	1	0	1	1	1	1	1	0	1	1	1	11				135	0.4	2.01992	0.583095	0.538516	0.781025	0.824621	3.08058	0.728011	0.2	0.894427	0.412311	0.583095	0.2	0.728011	0.655553					135	1					135	1.11803
136	1	1	1	1	0	1	1	1	1	1	0	1	1	1	12				136	0.316228	1.47112	0.412311	0.707107	0	0.565685	0.1	0.360555	0.3	1.34164	0.1	3.08058	0.72111	0.360555	0.386433					136	1					136	0.2
137	1	1	1	1	0	0	0	1	1	0	0	1	1	1	9				137	0.447214	0.262488	0.360555	0.728011	0.3	0.1	0.7	0.141421	0.4	1.26491	0.608276	0.1	0.7	0.141421	0.380278					137	1					137	0.5
138	1	1	1	1	0	1	0	1	1	1	0	0	1	1	10				138	1.45602	0.582238	0.282843	0.447214	1.34536	0	1.2083	0.948683	0.141421	1.48661	1.11803	0.7	1.44222	0.948683	0.948683					138	1					138	0.223607
139	1	1	1	1	0	1	1	1	1	1	0	0	1	1	11				139	0.72111	0.640312	0.1	0	1.00499	0	0.424264	0.1	0.1	1.33417	0.412311	1.2083	0.728011	0.1	0.418287					139	1					139	0.640312
140	1	1	1	1	0	1	1	1	1	1	0	1	1	1	12				140	0.282843	1.00499	0.316228	0	0.1	0.360555	1.20416	0.360555	0.583095	0.141421	1.50333	0.424264	0.943398	0.360555	0.360555					140	1					140	0.2
141	1	1	0	1	0	1	1	1	1	0	0	1	1	1	10				141	0.8	0.5	0.282843	0	0.3	0	0.4	0.728011	1.10454	1	2.03961	1.20416	1.5	0.728011	0.728011					141	0					141	0.67082
142	0	1	0	1	0	0	1	1	1	1	0	1	1	1	9				142	0.6	1.11803	0	0.509902	0.1	1.48661	0	0	2.06155	0.3	1	0.4	1.2	0	0.454951					142	1					142	0.223607
143	0	1	0	1	0	0	1	1	1	1	0	1	1	1	9				143	0.360555	1.11803	0.223607	0.640312	0.728011	0.538516	0	0.316228	1.71172	0.1	1.22066	0	0.707107	0.316228	0.449536					143	1					143	1.0198
144	1	1	1	1	0	0	1	1	1	1	0	1	1	1	11				144	0.538516	1.48661	0.282843	0.860233	0.806226	0.5	1.5	0	2.38537	0.4	1.0198	0	0.608276	0	0.573396					144	1					144	0.4
145	1	1	1	1	0	0	1	1	1	1	0	1	1	1	11				145	0.538516	0.424264	0.223607	0.5	0.2	0	0.412311	2.11896	0.894427	0.761577	0.5	1.5	1.253	2.11896	0.519258					145	1					145	0.223607
146	1	1	1	1	0	0	1	1	1	0	0	0	1	1	9				146	1.14018	1.56205	0.2	0.608276	1.26491	0	0.67082	0.608276	0.707107	0.360555	0.7	0.412311	0.948683	0.608276	0.639548					146	1					146	0.223607
147	1	1	0	1	0	0	1	1	1	0	0	0	1	1	8				147	0.316228	1.21655	0.223607	0.412311	0.3	0	1.20416	0.509902	0.2	0	0.4	0.67082	0.2	0.509902	0.358114					147	1					147	0.3
148	1	0	0	1	0	0	1	0	1	0	0	0	1	1	6				148	0.141421	2.13776	0.412311	0	0.848528	0	4.88262	1.772	0.223607	0.538516	0.509902	1.20416	0.921954	1.772	0.693522					148	1					148	1.14018
149	1	0	0	1	0	0	1	0	1	0	0	0	1	1	6				149	1.2	0.921954	0.223607	0	0.360555	0.1	1.86815	0.707107	1.52971	0.412311	0	4.88262	0.583095	0.707107	0.645101					149	1					149	0.282843
150	1	1	0	1	0	0	1	0	1	0	0	0	1	1	7				150	0.2	0.1	1.06301	0.894427	0.806226	0	0.565685	0.6	1.00499	0	0.424264	1.86815	0.2	0.6	0.582843					150	1					150	0.1
151	0	1	1	1	0	0	1	1	1	0	0	1	1	1	9				151	0.282843	0.1	0.6	0.223607	0.360555	0	0.316228	0	0.632456	0.424264	0	0.565685	1.62788	0	0.299535					151	1					151	0.3
152	1	1	1	1	0	0	1	1	1	1	0	1	1	1	11				152	0.1	0.223607	0.1	0.447214	1.61245	0	1.41421	0	0.447214	0.707107	0.412311	0.316228	0.894427	0	0.364269					152	1					152	0.8544
153	1	1	1	1	0	0	1	1	1	1	0	0	1	1	10				153	0.1	0.223607	0.921954	0	1.62788	0	2.91548	0.583095	1.96469	0.583095	0.761577	1.41421	1.86011	0.583095	0.672336					153	1					153	0.223607
154	1	1	1	1	0	0	1	1	1	0	0	1	1	1	10				154	0.5	0.141421	0.583095	0.948683	0.905539	0.223607	1.93132	0	1.11803	0.2	1.58114	2.91548	1	0	0.744317					154	1					154	1.94165
155	1	1	0	1	0	0	1	0	1	0	0	1	1	1	8				155	0.1	0.2	0.412311	0.223607	0.583095	0	1.61245	0.538516	2.86007	0.282843	0.412311	1.93132	1.51327	0.538516	0.475414					155	1					155	0.921954
156	0	0	0	1	0	0	1	0	1	0	0	1	1	1	6				156	0.316228	1.11803	0.848528	0.5	0.1	0.3	1.0198	0.860233	1.62788	0.424264	0.640312	1.61245	0.5	0.860233	0.74442					156	1					156	0.824621
157	0	0	0	1	0	0	1	0	1	0	0	0	1	1	5				157	0.223607	0.943398	0.8	0	0	0.2	0.640312	1.17047	0.806226	0	0.2	1.0198	0	1.17047	0.43196					157	1					157	0.583095
158	0	0	0	1	0	0	1	0	1	0	0	0	1	1	5				158	0.223607	0.2	0.905539	0	0	0.2	0.316228	0.72111	1.02956	0	0.141421	0.640312	1.07703	0.72111	0.269917					158	1					158	0.583095
159	0	0	0	1	0	0	1	0	1	1	0	0	1	1	6				159	0.1	0.223607	0.8544	0	0.1	0.707107	0.3	0.360555	0.282843	0.2	0.67082	0.316228	0.282843	0.360555	0.291421					159	1					159	1.20416
160	0	0	0	1	0	0	1	0	1	1	0	0	1	1	6				160	0.2	0.3	0.412311	0.640312	0	0	0	0.806226	0.4	0.3	0	0.3	0.2	0.806226	0.3					160	1					160	1.41421
161	0	0	0	1	0	0	1	0	1	0	0	0	1	1	5				161	0.3	0.509902	1.1	0.282843	0.5	0.1	0.412311	0.5	0.5	0.583095	0.8544	0	0.447214	0.5	0.5					161	0					161	1.81108
162	0	0	0	1	0	0	1	0	1	0	0	0	1	1	5				162	0.223607	0.5	0.223607	0.4	0.67082	0	0.8544	1.33417	0.2	0.509902	0.424264	0.412311	1.51327	1.33417	0.462132					162	0					162	0.424264
163	0	0	0	1	0	0	1	0	1	0	0	0	1	1	5				163	0.2	0.1	0.282843	0.5	1	0	0	0.806226	0.5	0.316228	0.282843	0.8544	0.2	0.806226	0.299535					163	0					163	1.31529
164	0	0	0	1	0	0	1	0	1	0	0	0	1	1	5				164	0.223607	0.5	0.4	0.2	1.08167	0.1	0.2	0.316228	0.2	0	0.1	0	0	0.316228	0.2					164	1					164	0.5
165	1	0	0	1	0	0	1	0	1	0	0	0	1	1	6				165	0.223607	0.282843	0.447214	0	0.2	0.608276	0.538516	0.5	0.1	0.316228	0	0.2	0.509902	0.5	0.299535					165	1					165	0.8
166	0	0	0	1	0	0	1	0	1	0	0	0	1	1	5				166	0.5	0	0.424264	0	1.30384	0	0.538516	1.42127	0.781025	0.1	0.3	0.538516	1.9105	1.42127	0.519258					166	1					166	0.424264
167	0	0	0	1	0	0	0	0	1	0	0	0	0	1	3				167	0.5	0.1	0.223607	0	0.447214	0	0	0.447214	0.5	0	0.707107	0.538516	0.223607	0.447214	0.33541					167	0					167	1.07703
168	0	0	0	1	0	0	0	0	1	0	0	0	0	1	3				168	0.223607	0.1	0.1	0.1	0.2	0	0.1	0.921954	1.07703	0	0	0	1.13137	0.921954	0.1					168	0					168	0.905539
169	0	0	0	1	0	0	0	0	0	0	0	0	0	1	2				169	0.5	0.141421	0.583095	0	0.1	0	0.608276	0.316228	0.5	0.2	0	0.1	0	0.316228	0.170711					169	0					169	0.632456
170	0	0	0	1	0	0	0	0	0	0	0	0	0	1	2				170	0.538516	0.141421	0.316228	0	0	0	0	0.761577	0.316228	0.1	0	0.608276	0.538516	0.761577	0.228825					170	0					170	0.824621
171	0	0	0	1	0	0	0	0	0	0	0	0	0	1	2				171	0.223607	0	0.707107	0.412311	0.282843	0	0.447214	0.632456	0.447214	0	0	0	0.824621	0.632456	0.347577					171	0					171	1.04403
172	0	0	0	0	0	0	0	0	0	0	0	0	0	1	1				172	0.3	0.223607	0.3	0.9	0	0.424264	0.4	0.447214	0.141421	0.1	0	0.447214	0	0.447214	0.3					172	0					172	0.632456
173	0	0	0	0	0	0	0	0	0	0	0	0	0	1	1				173	0.1	0.223607	0.632456	0	0	1.22066	0.223607	0.223607	0.223607	0	0	0.4	0.761577	0.223607	0.223607					173	0					173	0.860233
174	0	0	0	0	0	0	0	0	0	0	0	0	0	1	1				174	0.282843	0.223607	0.3	0.707107	0.282843	0.316228	0.2	0.424264	0.223607	0	0	0.223607	0.424264	0.424264	0.282843					174	0					174	1.11803
175	0	0	0	0	0	0	0	0	0	0	0	0	0	1	1				175	0.282843	0.1	0.223607	0.1	0.565685	0.282843	0.1	0.5	0.1	0	0	0.2	0.223607	0.5	0.211803					175	0					175	0.5
176	0	0	0	0	0	0	0	0	0	0	0	0	0	1	1				176	0.141421	0	0.9	0	0.360555	0.282843	0.2	0.1	0.223607	0	0	0.1	0.5	0.1	0.120711					176	0					176	0.223607
177	0	0	0	0	0	0	0	0	0	0	1	0	0	1	2				177	0.1	0.141421	0.894427	0	0.632456	0	0.1	0	0.1	0	0	0.2	0.1	0	0.1					177	0					177	0.424264
178	0	0	0	0	0	0	0	0	0	0	1	0	0	1	2				178	0.316228	0.2	0.2	0	0.360555	0	0.4	1.00499	0.1	0.223607	0	0.1	0.1	1.00499	0.2					178	0					178	0.2
179	0	0	0	0	0	0	0	0	0	0	1	0	0	0	1				179	0.141421	0.141421	0.921954	0	1.61245	0	0.3	0.7	0.1	0	0	0.4	0.943398	0.7	0.220711					179	0					179	0.3
180	0	0	0	0	0	0	0	0	0	0	0	0	0	0	0				180	0.223607	0.223607	0	0	0	0	0	0	0.3	0.316228	0	0.3	0.806226	0	0					180	0					180	0.538516
181	0	0	0	0	0	0	0	0	0	0	0	0	0		0				181	0.1	0.223607	0.1	0	0.2	0.1	0.1	0	0.1	0	0	0	1.72627	0	0.1					181	0					181	0.185696
182	0	0	0	0	0	0	0	0	0	0	0	0	0		0				182	0.1	0.360555	0.608276	0	0.412311	0	0.223607	0.223607	0.1	0	0.2	0.1	1.07703	0.223607	0.211803					182	0					182	0.207153
183	0	0	0	0	0	0	0	0	1	0	0	0	0		1				183	0.761577	0.3	0.1	0	0.3	0	0	0	0.2	0.4	0.424264	0.223607	2.69258	0	0.211803					183	0					183	0.149519
184	0	0	0	0	0	0	0	0	1	0	0	0	0		1				184	0.316228	0	0.1	0	0.1	0	0	0.565685	0.2	0.1	0.412311	0	0.5	0.565685	0.1					184	0					184	0.12357
185	0	0	0	0	0	0	0	0	0	0	0	0	0		0				185	0.2	0	0.141421	0	0.1	0	0	0.5	0.141421	0	0.4	0	0.761577	0.5	0.120711					185	0					185	0.114995
186	0	0	0	0	0	0	0	0	0	0	0	0	0		0				186	0.2	0.141421	0	0	0.538516	0	0	0.3	0.1	0	0.1	0	0.3	0.3	0.1					186	0					186	0.188435
187	0	0	0	0	0	0	0	0	0	0	0	0	0		0				187	0.1	0	0	0	1.0198	0	0	0.9	0.1	0	0	0	0.282843	0.9	0					187	0					187	0.265368
188	0	0	0	0	0	0	0	0	0	0	0	0	0		0				188	0.412311	0.3	0.316228	0	0.608276	0	0	0.989949	0.1	0	0.141421	0	0	0.989949	0.120711					188	0					188	0.182147
189	0	0	0	0	0	0	0	0	0	0	0	0	0		0				189	0.223607	0	0.424264	0.360555	0.412311	0	0	0.141421	0.2	0	0.223607	0	0.860233	0.141421	0.170711					189	0					189	0.150943
190	0	0	0	0	0	0	0	0	0	0	0	0	0	0	0				190	0.282843	0	0.2	0	0	0	0.223607	0.2	0.141421	0.316228	0	0	0	0.2	0.0707107					190	0					190	0.112679
191	0	0	0	0	0	0	0	0	0	0	0	1	0	0	1				191	0.223607	0	0	0	0	0	0.1	0.412311	0.2	0	0.1	0.223607	0	0.412311	0.05					191	0					191	0.157224
192	0	0	0	0	0	0	0	0	0	0	0	1	0	0	1				192	0.1	0.316228	0	0	0	0	0.2	0.509902	0.4	0	0	0.1	0.2	0.509902	0.1					192	0					192	0.0872678
193	0	1	0	0	0	0	0	0	0	0	0	1	0	0	2				193	0.1	0.223607	0	0	0	0	0	0	0.1	0	0.223607	0.2	0	0	0					193	0					193	0.212577
194	0	0	0	0	0	0	0	0	0	0	0	1	0	0	1				194	0	0	0	0	0	2.1095	0	0.2	0.1	0.141421	0	0	0	0.2	0					194	0					194	0.111038
195	0	0	0	0	0	1	0	0	0	0	0	1	0	0	2				195	0.1	0.632456	0	0	0	0.2	0	0	0.2	0	0	0	0	0	0					195	0					195	0.143512
196	0	0	0	0	0	1	0	0	0	0	0	1	0	0	2				196	0.141421	0.447214	0	0	0	0.223607	0	0	0	0.3	0.1	0	0.728011	0	0					196	0					196	0.171339
197	0	0	0	0	0	0	0	0	0	0	0	1	0	0	1				197	0	0.5	0.632456	0	0.3	0	0	0.1	0.3	0	0	0	0	0.1	0					197	0					197	0.177102
198	0	1	0	0	0	0	0	0	0	0	0	1	0	0	2				198	0.1	0.8544	0.447214	0	0.223607	0	0	0.2	0	0.3	0	0	0.223607	0.2	0.15					198	0					198	0.135301
199	0	1	0	0	0	1	0	0	0	0	0	1	0	0	3				199	0.223607	0.5	0	0.4	0	0.1	0	0.3	0.1	0	0	0	0.223607	0.3	0.1					199	0					199	0.0666667
200	0	1	0	0	0	1	0	0	0	0	0	1	0	0	3				200	0.2	0.1	0	0	0.2	0	0	0.1	0	0	0.2	0	0.447214	0.1	0.05					200	0					200	0.106563
201	0	1	0	0	0	1	0	0	0	0	0	1	0	0	3				201	0.316228	0.141421	0	0	0.72111	0	0	0	0	0	0.1	0	0	0	0					201	0					201	0.151121
202	0	1	0	0	0	1	0	0	0	0	0	0	0	0	2				202	0.509902	0.141421	0.538516	0	0.1	0	0	0	0.223607	0	0	0	0.141421	0	0					202	1					202	0.13851
203	0	1	0	0	0	1	0	0	0	0	0	0	0	0	2				203	0.538516	0	0	0.6	0.223607	0	0.2	0	0.1	0	0	0	0.806226	0	0					203	0					203	0.13806
204	0	1	0	0	0	1	0	0	0	0	0	0	0	0	2				204	0.632456	0.424264	0	0	0.4	0	0	0	0	0.2	0	0.2	0	0	0					204	0					204	0.0513523
205	0	1	0	0	0	1	0	0	1	0	0	0	0	0	3				205	0.316228	0	0	0	0	0	0	0	0.2	0.1	0	0	0.1	0	0					205	0					205	0.192693
206	0	1	0	0	0	0	0	0	1	0	0	1	0	0	3				206	1.6	0	0	0.1	0.2	0	0.412311	0	0	0	0	0	0	0	0					206	0					206	0.298549
207	0	1	0	1	0	1	0	0	1	0	0	1	0	0	5				207	1.56525	0.632456	0	0	0	0.2	0	0	0.2	0	0.984886	0.412311	1.92354	0	0.1					207	0					207	0.182886
208	0	1	0	1	0	1	0	0	1	0	0	0	0	0	4				208	0.640312	0.447214	0.2	0.1	0	0	0	0.707107	0.1	0	0	0	0.2	0.707107	0.1					208	1					208	0.399924
209	0	1	0	1	0	1	0	0	1	0	0	0	0	0	4				209	0.583095	0.640312	0	0.1	0.72111	0.67082	1.36015	0.223607	0.1	0	0.4	0	0.583095	0.223607	0.311803					209	1					209	0.219616
210	0	1	0	1	0	0	0	0	1	0	0	0	0	0	3				210	0.1	0.4	0	0.141421	0.412311	0.72111	0.360555	0.1	0.1	0	0.3	1.36015	0.608276	0.1	0.220711					210	1					210	0.328412
211	0	1	0	1	0	0	0	0	1	0	0	0	0	0	3				211	0.223607	1.60312	0	0.1	0.5	0	0.2	0.360555	0.141421	0.141421	0.67082	0.360555	0.141421	0.360555	0.211803					211	0					211	0.324405
212	0	1	0	1	0	0	0	0	1	0	0	0	0	0	3				212	0.538516	0.806226	0	0	0	0.583095	1.6	0	0.141421	0	0.223607	0.2	0.424264	0	0.170711					212	0					212	0.325981
213	0	1	0	1	0	0	0	0	1	0	0	1	0	0	4				213	0.509902	0.7	0.1	0	0.4	0.860233	0.447214	0	0	0.447214	0.447214	1.6	0.282843	0	0.423607					213	0					213	0.481199
214	0	1	0	1	0	0	0	0	1	0	0	1	0	0	4				214	0.4	0.1	0	0	0.640312	0.583095	1.30384	0.6	0.223607	0	1.92354	0.447214	0.632456	0.6	0.515154					214	0					214	0.604911
215	0	1	0	1	0	0	0	0	1	0	0	1	0	0	4				215	0.583095	0.447214	1	0.728011	0.948683	0.984886	0.509902	1.0198	0.316228	0	0.72111	1.30384	0	1.0198	0.724561					215	0					215	0.373045
216	0	1	0	1	0	0	0	0	1	0	0	1	0	0	4				216	0.5	0.583095	0.5	0	0	0	0.2	0.412311	0.2	0.5	1.58114	0.509902	0	0.412311	0.412311					216	1					216	0.372095
217	0	1	0	1	0	0	0	0	1	0	0	1	0	0	4				217	0.141421	0.3	0.223607	0.360555	0.2	0	0	0.1	0	1.23693	1.90263	0.2	0.1	0.1	0.170711					217	1					217	0.427021
218	0	1	0	1	0	0	0	0	1	0	0	1	0	0	4				218	0	0.2	0.447214	0.447214	0.5	0	0.2	0.3	0.1	0.4	2.52982	0	0.223607	0.3	0.261803					218	1					218	0.449634
219	0	1	0	1	0	0	0	0	1	0	0	0	0	0	3				219	0	0.608276	0	0.223607	0	0	0.6	1.31529	0.223607	0.6	1.82483	0.2	0	1.31529	0.223607					219	1					219	0.324128
220	0	1	0	1	0	0	0	0	1	0	0	0	0	0	3				220	0.640312	0.905539	0.2	0.223607	0.223607	0	0.4	0.412311	0.223607	0.3	0.360555	0.6	0	0.412311	0.330278					220	0					220	0.297751
221	0	1	0	1	0	0	0	1	1	0	0	0	0	0	4				221	0.5	0.223607	0	0	0.5	0	0	0.360555	0	1.78885	0.2	0.4	0.3	0.360555	0.261803					221	0					221	0.547199
222	0	1	0	1	0	0	0	1	1	0	0	0	0	0	4				222	0.1	0.728011	0.8	0.2	0.447214	0.5	0.223607	0.316228	0.141421	2.5	0.509902	0	0.1	0.316228	0.316228					222	0					222	0.284462
223	0	1	0	1	0	0	0	1	1	0	0	0	0	0	4				223	0	0.1	0	0	0.583095	0.6	0	0.223607	0.2	0.447214	0.943398	0.223607	0.412311	0.223607	0.223607					223	0					223	0.208766
224	0	1	0	1	0	0	0	1	1	0	0	0	0	0	4				224	0	0.223607	0.2	0	0.141421	0	0	0	0.223607	0.3	1.21655	0	0	0	0					224	0					224	0.107929
225	0	1	0	1	0	0	0	1	0	0	0	0	0	0	3				225	0	0.4	0	0	0.412311	0	0	0	0.2	0	0.282843	0	0.1	0	0					225	0					225	0.217355
226	0	1	0	1	0	0	0	1	0	0	0	0	0	0	3				226	0	0.141421	0	0	0.360555	0	0.2	0.824621	0	0	1.08167	0	0.412311	0.824621	0.0707107					226	0					226	0.134276
227	0	1	0	1	0	0	0	1	0	0	0	0	0	0	3				227	0	0.1	0	0	0.141421	0	0.141421	0.1	0.223607	0.316228	0.447214	0.2	0	0.1	0.1					227	0					227	0.0534518
228	0	1	0	1	0	0	0	1	0	0	0	0	0	0	3				228	0	0	0	0	0.1	0	0.1	0.1	0.2	0	0.141421	0.141421	0.640312	0.1	0.1					228	0					228	0.275894
229	0	1	0	1	0	0	0	1	0	0	0	0	0	0	3				229	0.1	0.1	0.2	0.2	0.223607	0	0.707107	1.14018	0.1	0.316228	0.223607	0.1	0.1	1.14018	0.2					229	0					229	0.0633796
230	0	1	0	1	0	0	0	1	0	0	0	0	0	0	3				230	0	0	0.3	0	0.360555	0	0.1	0	0	0	0	0.707107	0.424264	0	0					230	0					230	0.415272
231	0	1	1	1	0	0	0	0	0	0	0	0	0	0	3				231	0.1	0.5	0.7	0	1.82483	0.424264	0	0	0.1	0	1.33417	0.1	0	0	0.1					231	0					231	0.28027
232	0	1	0	1	0	0	0	0	0	0	0	0	0	0	2				232	0	0.1	0	0	0.728011	0	1.80278	0	0.1	0	0.632456	0	0.316228	0	0					232	0					232	0.274316
233	0	1	0	0	0	0	0	0	0	0	0	0	0	0	1				233	0	0.223607	0.447214	0	1.89737	0	0.223607	0	0.5	0	0	1.80278	0	0	0					233	0					233	0.141917
234	0	1	0	0	0	0	0	0	0	0	0	0	0	0	1				234	0	0.141421	0	0	0.761577	0	0.2	0.2	0	0.4	0	0.223607	0.1	0.2	0.120711					234	0					234	0.204277
235	0	1	0	0	0	0	0	0	0	0	0	0	0	0	1				235	0.141421	0.2	0	0	0.509902	0	0	1	0.2	0.3	0	0.2	0.538516	1	0.2					235	0					235	0.103934
236	0	1	0	0	0	0	0	0	0	0	0	0	0	0	1				236	0	0	0	0	0.3	0.3	0.2	0	0	0.447214	0	0	0.67082	0	0					236	0					236	0.143557
237	0	1	0	1	0	0	0	0	0	0	0	0	0	0	2				237	0	0	0	0	0.538516	0	0.6	0	0.360555	0.223607	0	0.2	0.5	0	0					237	0					237	0.131771
238	0	1	0	1	0	0	0	0	0	0	0	0	0	0	2				238	0.316228	0	0	0	0.223607	0	0	0	0.4	0.5	0	0.6	0.921954	0	0					238	0					238	0.133333
239	0	1	0	1	0	0	0	0	0	0	0	0	0	0	2				239	0.2	0.2	0	0	0.6	0	0.1	0	0.1	0.3	0.1	0	0.360555	0	0.1					239	0					239	0.39299
240	0	1	0	1	0	0	0	0	0	0	0	0	0	0	2				240	0.4	0.141421	0	0	0.943398	0	0.2	0.640312	0.1	0.848528	1.44222	0.1	0.447214	0.640312	0.3					240	0					240	0.182267
241	0	1	0	1	0	0	0	0	0	0	0	0	0	0	2				241	0.2	0	0	0	0.948683	0.538516	0.1	0	0.2	0	0	0.2	0.141421	0	0.05					241	0					241	0.17535
242	0	1	0	1	0	0	0	0	0	0	0	0	0	0	2				242	0.141421	0.1	0	0	0.3	0.538516	0	0	0.1	0.5	0.141421	0.1	0	0	0.1					242	0					242	0.270479
243	0	1	0	1	0	0	0	0	0	0	0	0	0	0	2				243	0.223607	0.141421	0.67082	0	0.509902	0.5	0	0	0.2	0.3	0.7	0	1.20416	0	0.211803					243	0					243	0.220888
244	0	1	1	1	0	0	0	0	0	0	0	0	0	0	3				244	0	0.1	0.141421	0.2	0.316228	0.223607	0	0.316228	0.223607	1.02956	0.1	0	0.538516	0.316228	0.211803					244	0					244	0.302414
245	0	0	0	1	0	0	0	0	0	0	0	0	0	0	1				245	0.282843	0.2	0.141421	0.360555	0.583095	0.412311	0	0.424264	0.360555	0.223607	0.640312	0	0.360555	0.424264	0.360555					245	0					245	0.147086
246	0	0	0	1	0	0	0	0	0	0	0	0	0	0	1				246	0.223607	0.4	0.141421	0.1	0	0	0	0.1	0.1	0	0.7	0	0.67082	0.1	0.1					246	0					246	0.302254
247	0	0	0	1	0	0	0	0	0	0	0	0	0	0	1				247	0.360555	0.1	0.316228	0	0	0	1.40357	0.223607	1.08167	0.141421	0	0	0.1	0.223607	0.120711					247	0					247	0.135376
248	0	0	0	1	0	0	0	0	0	0	0	0	0	0	1				248	0.2	0	0.1	0.3	0	0	0.583095	0.2	0.141421	0	0.1	1.40357	0.1	0.2	0.120711					248	0					248	0.0367851
249	0	0	0	0	0	0	0	0	0	0	0	0	0	0	0				249	0.2	0.1	0	0	0	0	0	0.141421	0	0	0	0.583095	0.2	0.141421	0					249	0					249	0.32452
250	0	0	1	0	0	0	0	0	0	0	0	0	0	0	1				250	0.141421	0	0	0.282843	0	1.04403	0	0	2.32594	0	0	0	0.424264	0	0					250	0					250	0.0975684
251	0	0	0	0	0	0	0	0	0	0	0	0	0	0	0				251	0.1	0.1	0.67082	0	0	0	0	0	0.2	0	0	0	0	0	0					251	0					251	0.073438
252	0	1	0	0	0	0	0	0	0	0	0	0	0	0	1				252	0.316228	0	0	0	0	0	0	0	0.2	0.223607	0	0	0	0	0					252	0					252	0.148759
253	0	1	0	0	0	0	0	0	0	0	0	0	0	0	1				253	0	0.1	0	0	0	0.1	0.412311	0.360555	0.223607	0	0.447214	0	0	0.360555	0.05					253	0					253	0.091457
254	0	1	0	0	0	0	0	0	0	0	0	0	0	0	1				254	0	0.1	0	0	0	0	0	0.316228	0.316228	0	0.223607	0.412311	0.424264	0.316228	0.05					254	0					254	0.0652369
255	0	1	0	0	0	0	0	1	0	0	0	0	0	0	2				255	0	0	0	0.282843	0	0.2	0	0	0.3	0	0	0	0	0	0					255	0					255	0.0969933
256	0	1	0	0	0	0	0	1	0	0	0	0	0	0	2				256	0.1	0.223607	0	0	0	0.1	0	0	0.640312	0	0	0	0	0	0					256	0					256	0.0402369
257	0	1	0	0	0	0	0	0	0	0	0	0	0	0	1				257	0	0	0	0	0	0	0	0	0.1	0	0.1	0	0.1	0	0					257	0					257	0.102334
258	0	1	0	0	0	0	0	0	0	0	0	0	0	0	1				258	0	0	0	0	0	0	0	0.2	0	0.1	0.728011	0	0.989949	0.2	0					258	0					258	0.140085
259	0	1	0	0	0	0	0	0	0	0	0	0	0	0	1				259	0.2	0	0	0.1	0	0	0	0	0.6	0	0.781025	0	0.360555	0	0					259	0					259	0.113387
260	0	1	0	0	0	0	0	0	0	0	0	0	0	0	1				260	0.141421	0	0	0.141421	0	0	0.761577	0	0.316228	0	0	0	0.6	0	0					260	0					260	0.119986
261	0	1	0	0	0	0	0	0	0	0	0	0	0	0	1				261	0.1	0.1	0	0.316228	0	0	0.5	0.1	0.223607	0	0	0.761577	0.141421	0.1	0.1					261	0					261	0.0967129
262	0	1	0	0	0	0	0	0	0	0	0	1	0	0	2				262	0	0.2	0.2	0.2	0	0	0	0.1	0.1	0.360555	0	0.5	0.412311	0.1	0.1					262	0					262	0.0935564
263	0	1	0	0	0	0	0	1	0	0	0	0	0	0	2				263	0	0.2	0	0.141421	0	0.223607	0	0	0.141421	0.316228	0	0	0.424264	0	0					263	0					263	0.0686887
264	0	0	0	0	0	0	0	0	0	0	0	0	0	0	0				264	0.1	0.282843	0	0	0	0.141421	0.1	0.2	0	0	0	0	0	0.2	0					264	0					264	0.0573862
265	0	0	0	0	0	0	0	0	0	0	0	0	0	0	0				265	0.223607	0.141421	0	0	0	0.1	0.223607	0	0	0	0	0.1	0	0	0					265	0					265	0.155673
266	0	0	0	0	0	0	0	0	0	0	0	0	0	0	0				266	0	0	0	0	0	0.538516	0	0	0.2	0.1	1.02956	0.223607	0	0	0					266	0					266	0.120601
267	0	0	0	0	0	0	0	0	0	0	0	0	0	0	0				267	0.2	0.223607	0.4	0	0	0.3	0	0	0.223607	0.1	0	0	0.360555	0	0.05					267	0					267	0.158749
268	0	0	0	0	0	0	0	0	0	0	0	0	0	0	0				268	0	0.3	0	0	0	1.00499	0	0	0.2	0	0.4	0	1.48661	0	0					268	0					268	0.0623226
269	0	0	0	0	0	0	0	0	0	0	0	0	0	0	0				269	0	0	0	0	0	0.424264	0	0.1	0.223607	0	0	0	1.7	0.1	0					269	0					269	0.163137
270	0	0	0	0	0	0	0	0	0	0	0	0	0	0	0				270	0	0	0	0.3	0	1	0	0.316228	0.2	0.141421	0	0	1.28062	0.316228	0.0707107					270	0					270	0.222781
271	0	0	0	0	0	0	0	0	0	0	0	0	0	0	0				271	0.3	0	0	1.34536	0	0.1	0	0.728011	0.2	0	0	0	0.316228	0.728011	0.05					271	0					271	0.395831
272	0	0	0	0	0	0	0	0	0	0	0	0	0	0	0				272	0.360555	0	0	0.632456	0	1.0198	2.02485	0.3	0.412311	0	0	0	0.360555	0.3	0.3					272	0					272	0.208546
273	0	0	0	0	0	0	0	0	0	0	0	0	0	0	0				273	0	0.447214	0	0.360555	0	0.1	0.1	0	0.984886	0	0.509902	2.02485	0	0	0.05					273	0					273	0.106313
274	0	0	0	0	0	0	0	0	0	0	0	0	0	0	0				274	0	0.447214	0	0	0.1	0	0	0	0.412311	0	0.316228	0.1	0	0	0					274	0					274	0.24162
275	0	0	0	0	0	0	0	0	0	0	0	0	0	0	0				275	0.5	0.509902	0.608276	0.316228	0.2	0.4	0.141421	0	0.223607	0	0	0	0.282843	0	0.211803					275	0					275	0.133661
276	0	0	0	0	0	0	0	0	0	0	0	0	0	0	0				276	0.1	0.223607	0.223607	0.316228	0	0.424264	0.316228	0	0	0	0	0.141421	0	0	0.05					276	0					276	0.185731
277	0	0	0	0	0	0	0	0	0	0	0	0	0	0	0				277	0	0.1	0.509902	0	0	1.0198	0	0	0.282843	0.316228	0	0.316228	0	0	0					277	0					277	0.107729
278	0	0	0	0	0	0	0	0	0	0	0	0	0	0	0				278	0.141421	0.3	0	0	0	0.141421	0	0	0.509902	0	0.2	0	0	0	0					278	0					278	0.249223
279	0	0	0	0	0	0	0	0	0	0	0	0	0	0	0				279	0.2	0.141421	0	0.412311	0	0.707107	0	0.223607	0.5	0	0.806226	0	0.989949	0.223607	0.211803					279	0					279	0.223397
280	0	0	0	0	0	0	0	0	0	0	0	0	0	0	0				280	0.2	0	0.223607	0.424264	0	0.608276	0	0	0.824621	0.4	0	0	0.640312	0	0.1					280	0					280	0.20528
281	0	0	0	0	0	0	0	0	0	0	0	0	0	0	0				281	0.2	0	0	0	0.447214	0.412311	0	0	1.30384	0	0.1	0	0	0	0					281	0					281	0.410818
282	0	0	0	0	0	0	0	0	0	0	0	0	0	0	0				282	0.2	0.282843	0.1	0	0.5	0.1	0	0	3.60555	0	0.141421	0	0	0	0.05					282	0					282	0.255627
283	0	0	0	0	0	0	0	0	0	0	0	0	0	0	0				283	0.223607	0.447214	0	0	0.1	0.141421	0.5	0.424264	0.72111	0	0.509902	0	0	0.424264	0.182514					283	0					283	0.323107
284	0	0	0	0	0	0	0	0	0	0	0	0	0	0	0				284	0.1	0.1	0	0.4	0.538516	0.412311	0.6	0.509902	1.21655	0	0	0.5	0.1	0.509902	0.406155					284	0					284	0.271953
285	0	0	0	0	0	0	0	0	0	0	0	0	0	0	0				285	0.223607	0.316228	0.1	0.3	0	0.223607	0	0.5	1.6	0	0	0.6	0.1	0.5	0.223607					285	0					285	0.230438
286	0	0	0	0	0	0	0	0	0	0	0	0	0	0	0				286	0	0.1	0	0.1	0	0	0	0.3	1.94165	0.223607	0.1	0	0	0.3	0.05					286	0					286	0.431329
287	0	0	0	0	0	0	0	0	0	0	0	0	0	0	0				287	0.1	0.1	0	0	0.223607	0.223607	0	0	3.90512	0.3	0.1	0	0	0	0.05					287	0					287	0.23655
288	0	0	0	0	0	0	0	0	0	0	0	0	0	0	0				288	0.1	0.1	0	0.2	0	0	0	0	2.02237	0	0.316228	0	0	0	0					288	0					288	0.2
289	0	0	0	0	0	0	0	0	0	0	0	0	0	0	0				289	0.2	0.2	0.6	0.1	0.6	0.1	0	0	0.5	0	0.1	0	0.316228	0	0.1					289	0					289	0.193706
290	0	0	0	0	0	0	0	0	0	0	0	0	0	0	0				290	0.223607	0	0	0	0	0.4	0.360555	0	0.5	0.640312	0.1	0	0.509902	0	0.05					290	0					290	0.184036
291	0	0	0	0	0	0	0	0	0	0	0	0	0	0	0				291	0.3	0	0	0.1	0.223607	0	0	0	0	0.5	0.943398	0.360555	0.707107	0	0.05					291	0					291	0.120118
292	0	0	0	0	0	0	0	0	0	0	0	0	0	0	0				292	0	0.5	0	0	0.141421	0.2	0	0	0.4	0	0	0	0.6	0	0					292	0					292	0.20284
293	0	0	0	0	0	0	0	0	0	0	0	0	0	0	0				293	0.1	0.728011	0	0.141421	0	0.1	0	0.316228	0.509902	0	0.538516	0	0.4	0.316228	0.120711					293	0					293	0.253218
294	0	0	0	0	0	0	0	0	0	0	0	0	0	0	0				294	0	0.223607	0.223607	0.608276	0	0.2	0.412311	0.2	0.447214	0.223607	0.5	0	0.2	0.2	0.211803					294	0					294	0.261158
295	0	0	0	0	0	0	0	0	0	0	0	0	0	0	0				295	0.360555	0.3	0.509902	0	1	0	0.223607	0	0.316228	0.223607	0	0.412311	0.141421	0	0.223607					295	0					295	0.153352
296	0	0	0	0	0	0	0	0	0	0	0	0	0	0	0				296	0.1	0	0	0.2	0.223607	0	0	0.632456	0.223607	0.360555	0	0.223607	0	0.632456	0.15					296	0					296	0.186445
297	0	0	0	0	0	0	0	0	0	0	0	0	0	0	0				297	0.1	0	0	0.5	0.316228	0	0	0.360555	0.360555	0.3	0.1	0	0	0.360555	0.1					297	0					297	0.296275
298	0	0	0	0	0	0	0	0	0	0	0	0	0	0	0				298	0.316228	0.223607	0	0.223607	0	0	0	0.141421	0.67082	1.11803	0.761577	0	0	0.141421	0.141421					298	0					298	0.102785
299	0	1	0	0	0	0	0	0	0	0	0	0	0	0	1				299	0.412311	0	0	0.360555	0	0	0	0	0.360555	0.1	0	0	0.1	0	0					299	0					299	0.172988
300	0	1	0	0	0	0	0	0	0	0	0	0	0	0	1				300	0.316228	0.316228	0	0	0.2	0	0.2	0.360555	0.282843	0	0.3	0	0	0.360555	0.2					300	0					300	0.377519
301	0	0	0	0	0	0	0	0	0	0	0	0	0	0	0				301	0.2	0.5	0	0	0.3	0.447214	0.223607	0	2.14709	0.412311	0.2	0.2	0.316228	0	0.211803					301	0					301	0.352943
302	0	0	0	0	0	0	0	0	0	0	0	0	0	0	0				302	0.316228	0.707107	0	0.1	0.1	0.2	0.316228	0	1.02956	0.2	1.16619	0.223607	0.2	0	0.2					302	0					302	0.189358
303	0	0	0	0	0	0	0	0	0	0	0	0	0	0	0				303	0.1	0.316228	0	0	0	0.223607	0.1	0.2	0.632456	0.5	0.1	0.316228	0	0.2	0.15					303	0					303	0.32801
304	0	0	0	0	0	0	0	0	0	0	0	0	0	0	0				304	0.1	0.141421	1.06301	0	0	0.640312	0.2	0	0.608276	0.583095	0.6	0.1	0	0	0.120711					304	0					304	0.182345
305	0	0	0	0	0	0	0	0	0	0	0	0	0	0	0				305	0.282843	0.282843	0	0	0.1	0	0.316228	0.1	0.806226	0.2	0.1	0.2	0.2	0.1	0.15					305	0					305	0.214235
306	0	0	0	0	0	0	0	0	0	0	0	0	0	0	0				306	0.2	0	0	0	0.8	0	0.223607	0.2	0.7	0.223607	0.223607	0.316228	0.2	0.2	0.2					306	0					306	0.185349
307	0	0	0	0	0	0	0	0	0	0	0	0	0	0	0				307	0.3	0.360555	0	0	0.509902	0	0.2	0	0.2	0.141421	0.412311	0.223607	0	0	0.170711					307	0					307	0.203913
308	0	0	0	0	0	0	0	0	0	0	0	0	0	0	0				308	0.2	0.141421	0.2	0	0.1	0	0.4	0.2	0.905539	0.2	0	0.2	0	0.2	0.2					308	0					308	0.186543
309	0	0	0	0	0	0	0	0	0	0	0	0	0	0	0				309	0.1	0	0	0	0	0	0.538516	0	1.5	0.1	0	0.4	0.2	0	0					309	0					309	0.237343
310	0	0	0	0	0	0	0	0	0	0	0	0	0	0	0				310	0.141421	0.282843	0.1	1.06301	0	0	0	0	0.565685	0.412311	0.282843	0.538516	0	0	0.120711					310	0					310	0.118799
311	0	0	0	0	0	0	0	0	0	0	0	0	0	0	0				311	0.3	0.3	0	0.141421	0	0	0	0.1	0.223607	0.360555	0	0	0	0.1	0.05					311	0					311	0.209608
312	0	0	0	0	0	0	0	0	0	0	0	0	0	0	0				312	0.282843	0.3	0	0.5	0.6	0	0	0.316228	0.316228	0.2	0	0	0	0.316228	0.241421					312	0					312	0.166589
313	0	0	0	0	0	0	0	0	0	0	0	0	0	0	0				313	0.2	0.2	0	0.5	0.141421	0	0.2	0.316228	0.3	0.141421	0	0	0	0.316228	0.170711					313	0					313	0.155995
314	0	0	0	0	0	0	0	0	0	0	0	0	0	0	0				314	0.282843	0	0	0.4	0	0	0.1	0.316228	0.360555	0.412311	0	0.2	0	0.316228	0.15					314	0					314	0.147556
315	0	0	0	0	0	0	0	0	0	0	0	0	0	0	0				315	0.141421	0	1.00499	0	0	0	0	0.2	0.282843	0.141421	0	0.1	0	0.2	0.05					315	0					315	0.201812
316	0	0	0	0	0	0	0	0	0	0	0	0	0	0	0				316	0.316228	0	0	0.223607	0	0	0.943398	0	0.538516	0.4	0	0	0	0	0					316	0					316	0.0980652
317	0	0	0	0	0	0	0	0	0	0	0	0	0	0	0				317	0.316228	0	0	0	0	0.1	0.3	0.360555	0.1	0	0	0.943398	0	0.360555	0.05					317	0					317	0.196061
318	0	0	0	0	0	0	0	0	0	0	0	0	0	0	0				318	0.141421	0	0	0.565685	0	0	0	0.2	0.2	0.538516	0.707107	0.3	0	0.2	0.170711					318	0					318	0.105419
319	0	0	0	0	0	0	0	0	0	0	0	0	0	0	0				319	0.1	0.1	0	0.223607	0	0	0.2	0.1	0.1	0.141421	0.3	0	0	0.1	0.1					319	0					319	0.177763
320	0	0	0	0	0	0	0	0	0	0	0	0	0	0	0				320	0.316228	0.141421	0	0	0	0	0.8544	0.360555	0.360555	0	0.1	0.2	0	0.360555	0.120711					320	0					320	0.0416667
321	0	0	0	0	0	0	0	ND	0	0	0	0	0	0	0				321	0	0	0	0	0	0	0.2	0	0.1	0.2	0	0.8544	0	0	0					321	0					321	0.055419
322	0	0	0	0	0	0	0	ND	0	0	0	0	0	0	0				322	0.223607	0	0	0	0	0	0	0.141421	0	0.3	0	0.2	ND	0.141421	0					322	0					322	0.226967
323	0	0	0	0	0	0	0	ND	0	0	0	0	0	0	0				323	0.223607	0.2	0	0	0	0	0.8	0	0	0.3	0	0	ND	0	0					323	0					323	0.151026
324	0	0	0	0	0	0	0	ND	0	0	0	0	0	0	0				324	0.1	0	0	0.4	0	0	0.5	0	0.1	0.412311	0.1	0.8	ND	0	0.1					324	0					324	0.191618
325	0	0	0	0	0	0	0	ND	0	0	0	0	0	0	0				325	0.223607	0	0	0	0	0	0.2	1.00499	0.223607	0.447214	0.1	0.5	ND	1.00499	0.2					325	0					325	0.127705
326	0	0	0	0	0	0	0	ND	0	0	0	0	0	0	0				326	0.2	0.2	0	0	0	0	0.316228	0	0	0.3	0.316228	0.2	ND	0	0					326	0					326	0.171012
327	0	0	0	0	0	0	0	ND	0	0	0	0	0	0	0				327	0.223607	0	0.412311	0	0.3	0	0.5	0	0.316228	0.2	0	0.316228	ND	0	0.2					327	0					327	0.215105
328	0	0	0	0	0	0	0	ND	0	0	0	0	0	0	0				328	0.316228	0.2	0.141421	0	0	0	0.5	0	0.223607	1.2	0	0.5	ND	0	0.141421					328	0					328	0.163156
329	0	0	0	0	0	0	0	ND	0	0	0	0	0	0	0				329	0.223607	0	0	0.921954	0	0	0.412311	0	0.3	0	0	0.5	ND	0	0					329	0					329	0.0863812
330	0	0	0	0	0	0	0	ND	0	0	0	0	0	0	0				330	0.282843	0	0	0	0	0	0.412311	0.1	0	0.141421	0	0.412311	ND	0.1	0					330	0					330	0.141754
331	0	0	0	0	0	0	0	ND	0	0	0	0	0	0	0				331	0.360555	0.2	0	0.141421	0	0	0	0.316228	0.3	0.282843	0	0.412311	ND	0.316228	0.2					331	0					331	0.109359
332	0	0	0	0	0	0	0	ND	0	0	0	0	0	0	0				332	0.2	0	0	0	0	0	0	0.5	0.412311	0.1	0	0	ND	0.5	0					332	0					332	0.025
333	0	0	0	0	0	0	0	ND	0	0	0	ND	0	0	0				333	0.1	0	0	0	0	0	0	0	0.1	0.1	0	0	ND	0	0					333	0					333	0.0722504
334	0	0	0	0	0	0	0	ND	0	0	0	ND	0	0	0				334	0.282843	0	0	0	0	0	0	0	0.360555	0.223607	0	0	ND	0	0					334	0					334	0.084696
335	0	0	0	0	0	0	0	ND	0	0	0	ND	0	0	0				335	0.223607	0.141421	0.509902	0	0	0	0	0	0	0.141421	0	0	ND	0	0					335	0					335	0.110355
336	0	0	0	0	0	0	0	ND	0	0	0	ND	0	0	0				336	0.1	0.1	0.6	0.141421	0	0	0	0	0.141421	0.141421	0	0	ND	0	0					336	0					336	0.156399
337	0	0	0	0	0	0	0	ND	0	0	0	ND	0	0	0				337	0	0	0	0.360555	0	0	0.1	0.316228	0.1	0	0.9	0	ND	0.316228	0					337	0					337	0.109158
338	0	0	0	0	0	0	0	ND	0	0	0	ND	0	0	0				338	0.2	0	0	0.2	0	0	0.4	0.509902	0	0	0	0.1	ND	0.509902	0					338	0					338	0.122029
339	0	0	0	0	0	0	0	ND	0	0	0	ND	0	0	0				339	0.141421	0	0	0.583095	0	0	0.2	0.316228	0.223607	0	0	0.4	ND	0.316228	0.141421					339	0					339	0.139972
340	0	0	0	0	0	0	0	ND	0	0	0	ND	0	0	0				340	0.316228	0.223607	0	0	0	0	0.5	0	0.223607	0.1	0.316228	0.2	ND	0	0.1					340	0					340	0.0755375
341	0	0	0	0	0	0	0	ND	0	0	0	ND	0	0	0				341	0.223607	0.1	0	0.141421	0.141421	0	0	0.3	0	0	0	0.5	ND	0.3	0.1					341	0					341	0.0513523
342	0	0	0	0	0	0	0	ND	0	0	0	ND	0	0	0				342	0	0.1	0	0	0	0.1	0	0.316228	0	0.1	0	0	ND	0.316228	0					342	0					342	0.126209
343	0	0	0	0	0	0	0	ND	0	0	0	ND	0	0	0				343	0	0	0	0	0	0	0	0.608276	0.806226	0.1	0	0	ND	0.608276	0					343	0					343	0.148594
344	0	0	0	0	0	0	0	ND	0	0	0	ND	0	0	0				344	0.1	0	0	0.1	0.2	0	0.2	0.67082	0.412311	0.1	0	0	ND	0.67082	0.1					344	0					344	0.221523
345	0	0	0	0	0	0	0	ND	0	0	0	ND	0	0	0				345	0.223607	0.1	0.360555	0.707107	0.1	0	0.282843	0.360555	0.223607	0	0.3	0.2	ND	0.360555	0.223607					345	0					345	0.0907196
346	0	0	0	0	0	0	0	ND	0	0	0	ND	0	0	0				346	0.141421	0	0.1	0	0	0	0.2	0	0.447214	0	0.2	0.282843	ND	0	0					346	0					346	0.0701184
347	0	0	0	0	0	0	0	ND	0	0	0	ND	0	0	0				347	0.2	0	0	0	0.1	0	0	0	0.141421	0	0.4	0.2	ND	0	0					347	0					347	0.0613264
348	0	0	0	0	0	0	0	ND	0	0	0	ND	0	0	0				348	0.223607	0	0	0	0	0	0	0.1	0	0	0.412311	0	ND	0.1	0					348	0					348	0.0416667
349	0	0	0	0	0	0	0	ND	0	0	0	ND	0	0	0				349	0.1	0.1	0	0.1	0	0	0	0.1	0	0	0.1	0	ND	0.1	0					349	0					349	0.0919166
350	0	0	0	0	0	0	0	ND	0	0	0	ND	0	0	0				350	0	0	0	0	0.761577	0	0	0	0.141421	0	0.2	0	ND	0	0					350	0					350	0.0367851
351	0	0	0	0	0	0	0	ND	0	0	0	ND	0	0	0				351	0.1	0	0.2	0	0	0	0	0	0	0	0.141421	0	ND	0	0					351	0					351	0.0550463
352	0	0	0	0	0	0	0	ND	0	0	0	ND	0	0	0				352																				352	0					352	0.0709436

## Sheet: Sheet 9
Sheet 9.		Parameters of mass spawning event in S. intermedius 22 May of 2016, in Alekseev Bay
	Blue raws denote the beginning and the end of spawning in males, red raws denote the beginning and the end of spawning in females. The cells with figure "1" highlited by green color denote the presence of gamete clots on the aboral surface of males and females.
	Male spawning events																	Step length of males, cm																	Female spawning events										Step length of females, cm
Time, min	Male-11	Male-13	Male-14	Male-15	Male-2	Male-21	Male-25	Male-26	Male-27	Male-3	Male-4	Male-7	Male-9	Dynamics of male spawning			Time, min	Male-11	Male-13	Male-14	Male-15	Male-2	Male-21	Male-25	Male-26	Male-27	Male-3	Male-4	Male-7	Male-9	Median step length			Time, min	Female-12	Female-22	Female-23	Female-24	Female-5	Dynamics of female spawning				Time, min	Female-12	Female-22	Female-23	Female-24	Female-5
1	0	0	0	0	0	0	0	0	0	0	0	0	0	0			1																	1	0	0	0	0	0	0				1
2	0	0	0	0	0	0	0	0	0	0	0	0	0	0			2	0	0.1	0	0	0	0.412311	0.316228	ND	0.4	0	0.447214	0	0	0			2	0	0	0	0	0	0				2	0	0.1	0.412311	0.583095	0
3	0	0	0	0	0	0	0	0	0	0	0	0	0	0			3	0	0.316228	0.1	0.223607	0.223607	0.141421	0.4	ND	0	0	0.1	0.1	0.1	0.1			3	0	0	0	0	0	0				3	0	0.509902	0.282843	0.707107	0.1
4	0	0	0	0	0	0	0	0	0	0	0	0	0	0			4	0	0	0.223607	0	0	0.1	0.538516	ND	0.2	0	0.1	0	0.223607	0.05			4	0	0	0	0	0	0				4	0	0.4	0.282843	0.3	0
5	0	0	0	0	0	0	0	0	0	0	0	0	0	0			5	0	0	0.1	0	0	0.316228	0.223607	ND	0.282843	0	0	0	0	0			5	0	0	0	0	0	0				5	0	0.4	0.1	0.2	0
6	0	0	0	0	0	0	0	0	0	0	0	0	0	0			6	0.223607	0	0	0.223607	0	0.360555	0.3	ND	0.282843	0	0	0	0.1	0.05			6	0	0	0	0	0	0				6	0	0.141421	0.1	0.141421	0
7	0	0	0	0	0	0	0	0	0	0	0	0	0	0			7	0.565685	0.2	0.223607	0.1	0	0.316228	0.447214	ND	0.509902	0	0.2	0	0	0.2			7	0	0	0	0	0	0				7	0	0	0.509902	0.761577	0
8	0	0	0	0	0	0	0	0	0	0	0	0	0	0			8	0	0	0	0.282843	0	0.223607	0.141421	ND	0	0	0	0	0	0			8	0	0	0	0	0	0				8	0	0.141421	0.2	0.2	0
9	0	0	0	0	0	0	0	0	0	0	0	0	0	0			9	0.583095	0.2	0.1	0	0	0.4	0.316228	ND	0.316228	0	0	0	0.3	0.15			9	0	0	0	0	0	0				9	0	0	0.2	0.2	0
10	0	0	0	0	0	0	0	0	0	0	0	0	0	0			10	0.223607	0	0	0	0	0.1	0.2	ND	0.360555	0	0	0	0	0			10	0	0	0	0	0	0				10	0	0	0.141421	0.223607	0
11	0	0	0	0	0	0	0	0	0	0	0	0	0	0			11	0	0.2	0	0.2	0	0.583095	0.282843	ND	0	0	0	0	0	0			11	0	0	0	0	0	0				11	0	0.707107	0.1	0.3	0
12	0	0	0	0	0	0	0	0	0	0	0	0	0	0			12	0.3	0	0.1	0	0.141421	0.2	0.141421	ND	0.141421	0	0	0	0	0.05			12	0	0	0	0	0	0				12	0	0.316228	0.1	0.223607	0.141421
13	0	0	0	0	0	0	0	0	0	0	0	0	0	0			13	0	0.223607	0	0	0.412311	0.1	0.316228	ND	0	0	0	0	0	0			13	0	0	0	0	0	0				13	0	0.5	0.2	0.2	0
14	0	0	0	0	0	0	0	0	0	0	0	0	0	0			14	0	0.509902	0	0	0	0.141421	0	ND	0.223607	0	0	0	0	0			14	0	0	0	0	0	0				14	0	0	0.2	0.2	0
15	0	0	0	0	0	0	0	0	0	0	0	0	0	0			15	0	0.3	0	0	0	0.1	0.447214	ND	0	0	0	0	0.141421	0			15	0	0	0	0	0	0				15	0	0.1	0.360555	0.2	0.141421
16	0	0	0	0	0	0	0	0	0	0	0	0	0	0			16	0.1	0	0	0	0	0.4	0.632456	ND	0	0	0	0	0	0			16	0	0	0	0	0	0				16	0	0.316228	0.2	0.2	0
17	0	0	0	0	0	0	0	0	0	0	0	0	0	0			17	0	0	0	0	0	0.141421	0.1	ND	0	0	0	0.1	0	0			17	0	0	0	0	0	0				17	0	0.3	0	0.2	0
18	0	0	0	0	0	0	0	0	0	0	0	0	0	0			18	0	0	0.1	0	0	0	0.316228	ND	0	0	0.1	0	0	0			18	0	0	0	0	0	0				18	0	0.1	0.223607	0.360555	0
19	0	0	0	0	0	0	0	0	0	0	0	0	0	0			19	0.1	0	0	0	0	0.509902	0.3	ND	0	0.282843	0	0	0	0			19	0	0	0	0	0	0				19	0	0.1	0.1	0.2	0
20	0	0	0	0	0	0	0	0	0	0	0	0	0	0			20	0	0	0.1	0	0	0.316228	0.1	ND	0	0	0	0	0	0			20	0	0	0	0	0	0				20	0	0	0.1	0	0
21	0	0	0	0	0	0	0	0	0	0	0	0	0	0			21	0.2	0	0	0	0	0.1	0.4	ND	0	0	0	0	0	0			21	0	0	0	0	0	0				21	0	0	0	0.223607	0
22	0	0	0	0	0	0	0	0	0	0	0	0	0	0			22	0	0	0	0.223607	0	0.2	0.3	ND	0	0	0.1	0	0	0			22	0	0	0	0	0	0				22	0	0	0.1	0.1	0.707107
23	0	0	0	0	0	0	0	0	0	0	0	0	0	0			23	0	0	0	0	0	0.2	0.141421	ND	0	0	0	0	0	0			23	0	0	0	0	0	0				23	0.3	0	0.2	0	0
24	0	0	0	0	0	0	0	0	0	0	0	0	0	0			24	0	0	0	0	0	0.1	0.412311	ND	0	0	0	0	0	0			24	0	0	0	0	0	0				24	0.2	0	0.2	0.1	0.1
25	0	0	0	0	0	0	0	0	0	0	0	0	0	0			25	0	0	0	0	0	0.2	0.3	ND	0	0	0	0	0	0			25	0	0	0	0	0	0				25	0	0	0	0.1	0
26	0	0	0	0	0	0	0	0	0	0	0	0	0	0			26	0	0	0	0	0	0.141421	0	ND	0	0	0	0	0	0			26	0	0	0	0	0	0				26	0	0.141421	0.141421	0.2	0
27	0	0	0	0	0	0	0	0	0	0	0	0	0	0			27	0	0	0	0	0	0.3	0.3	ND	0.223607	0	0	0	0	0			27	0	0	0	0	0	0				27	0	0	0.141421	0.316228	0
28	0	0	0	0	0	0	0	0	0	0	0	0	0	0			28	0	0	0.1	0	0	0.583095	0.1	ND	0	0	0	0	0	0			28	0	0	0	0	0	0				28	0	0.1	0.1	0	0.223607
29	0	0	0	0	0	0	0	0	0	0	0	0	0	0			29	0	0.360555	0.316228	0	0.5	0.2	0.1	ND	0	0	0	0	0	0			29	0	0	0	0	0	0				29	0.2	0.223607	0.141421	0.223607	0
30	0	0	0	0	0	0	0	0	0	0	0	0	0	0			30	0	0	0	0.223607	0	0	0.1	ND	0	0	0	0	0	0			30	0	0	0	0	0	0				30	0	0.1	0	0.447214	0
31	0	0	0	0	0	0	0	0	0	0	0	0	0	0			31	0	0.1	0	0	0	0.1	0.360555	ND	0	0	0	0	0	0			31	0	0	0	0	0	0				31	0	0	0	0.3	0
32	0	0	0	0	0	0	0	0	0	0	0	0	0	0			32	0	0	0	0	0	0.2	0.360555	ND	0	0	0	0	0	0			32	0	0	0	0	0	0				32	0	0	0.282843	0.360555	0
33	0	0	0	0	0	0	0	0	0	0	0	0	0	0			33	0	0	0	0	0	0.1	0.360555	ND	0	0	0	0	0	0			33	0	0	0	0	0	0				33	0	0	0.141421	0.2	0.2
34	0	0	0	0	0	0	0	0	0	0	0	0	0	0			34	0	0	0.2	0	0.1	0.1	0.360555	ND	0.1	0	0.1	0	0	0.05			34	0	0	0	0	0	0				34	0	0	0.141421	0	0.2
35	0	0	0	0	0	0	0	0	0	0	0	0	0	0			35	0	0.1	0	0	0	0.3	0.360555	ND	0	0	0	0	0	0			35	0	0	0	0	0	0				35	0	0	0.3	0.282843	0
36	0	0	0	0	0	0	0	0	0	0	0	0	0	0			36	0	0	0	0	0	0.141421	0.360555	ND	0	0	0	0	0	0			36	0	0	0	0	0	0				36	0	0	0.412311	0	0
37	0	0	0	0	0	0	0	0	0	0	0	0	0	0			37	0	0	0	0.2	0	0.1	0.360555	ND	0	0	0	0.583095	0	0			37	0	0	0	0	0	0				37	0	0	0.1	0.1	0
38	0	0	0	0	0	0	0	0	0	0	0	0	0	0			38	0	0	0	0	0	0.2	0.583095	ND	0	0	0	0	0	0			38	0	0	0	0	0	0				38	0	0.1	0.1	0.1	0
39	0	0	0	0	0	0	0	0	0	0	0	0	0	0			39	0	0.3	0	0	0	0.2	0.141421	ND	0	0	0	0.1	0	0			39	0	0	0	0	0	0				39	0	0.2	0	0.1	0
40	0	0	0	0	0	0	0	0	0	0	0	0	0	0			40	0	0.1	0	0	0	0.2	0.2	ND	0	0	0	0	0	0			40	0	0	0	0	0	0				40	0.509902	0.1	0.1	0	0
41	0	0	0	0	0	0	0	0	0	0	0	0	0	0			41	0	0	0.360555	0.316228	0	0.1	0	ND	0	0	0.1	0.2	0	0			41	0	0	0	0	0	0				41	0	0	0.1	0.1	0
42	0	0	0	0	0	0	0	0	0	0	0	0	0	0			42	0	0	0.316228	0.2	0	0.2	0.282843	ND	0	0	0	0.5	0	0			42	0	0	0	0	0	0				42	0	0	0	0	0
43	0	0	0	0	0	0	0	0	0	0	0	0	0	0			43	0	0	0.447214	0	0	0.2	0.948683	ND	0	0	0	0	0	0			43	0	0	0	0	0	0				43	0	0	0.1	0.1	0
44	0	0	0	0	0	0	0	0	0	0	0	0	0	0			44	0	0	0.1	0.360555	0	0.141421	0.412311	ND	0	0	0.1	0.223607	0	0.05			44	0	0	0	0	0	0				44	0.2	0.1	0	0.1	0
45	0	0	0	0	0	0	0	0	0	0	0	0	0	0			45	0	0.223607	0.141421	0.141421	0	0.2	0.360555	ND	0	0	0.1	0.2	0	0.120711			45	0	0	0	0	0	0				45	0	0	0.316228	0.1	0
46	0	0	0	0	0	0	0	0	0	0	0	0	0	0			46	0	0	0	0.223607	0	0.141421	0.223607	ND	0	0	0	0	0	0			46	0	0	0	0	0	0				46	0	0.3	0.1	0	0
47	0	0	0	0	0	0	0	0	0	0	0	0	0	0			47	0	0.223607	0.141421	0.223607	0	0.1	0.223607	ND	0	0	0	0.223607	0	0.05			47	0	0	0	0	0	0				47	0	0.316228	0.1	0.1	0
48	0	0	0	0	0	0	0	0	0	0	0	0	0	0			48	0	0.2	0	0	0	0.2	0	ND	0	0	0	0.905539	0	0			48	0	0	0	0	0	0				48	0	0	0.223607	0.223607	0
49	0	0	0	0	0	0	0	0	0	0	0	0	0	0			49	0	0.1	0	0	0	0.223607	0.707107	ND	0	0	0	0.67082	0	0			49	0	0	0	0	0	0				49	0	0	0	0.141421	0
50	0	0	0	0	0	0	0	0	0	0	0	0	0	0			50	0	0	0	0	0.5	0.1	0.608276	ND	0	0	0.2	0	0	0			50	0	0	0	0	0	0				50	0	0	0.141421	0.223607	0.3
51	0	0	0	0	0	0	0	0	0	0	0	0	0	0			51	0	0	0	0	0.2	0.141421	0.1	ND	0	0	0	0.565685	0	0			51	0	0	0	0	0	0				51	0.6	0.316228	0.141421	0.1	0
52	0	0	0	0	0	0	0	0	0	0	0	0	0	0			52	0	0	0	0	0	0.2	0.2	ND	0	0	0	1.50333	0	0			52	0	0	0	0	0	0				52	0.223607	1.5	0.141421	0	0
53	0	0	0	0	0	0	0	0	0	0	0	0	0	0			53	0.2	0	0	0	0	0.141421	0.1	ND	0	0	0	0.4	0	0			53	0	0	0	0	0	0				53	0.1	1.23693	0.223607	0.316228	0
54	0	0	0	0	0	0	0	0	0	0	0	0	0	0			54	0	0	0	0.3	0	0.2	0.1	ND	0	0	0	0.316228	0	0			54	0	0	0	0	0	0				54	0.1	0.9	0.1	0.1	0.141421
55	0	0	0	0	0	0	0	0	0	0	0	0	0	0			55	1.11803	0.223607	0	0.2	1.52315	0.2	0.2	ND	0	0	0	0.632456	0	0.2			55	0	0	0	0	0	0				55	0	0.806226	0.1	0.1	0.67082
56	0	0	0	0	0	0	0	0	0	0	0	0	0	0			56	0.3	0	0	0	0	0.1	0.223607	ND	0	0	0	0.360555	0	0			56	0	0	0	0	0	0				56	0	0.447214	0.282843	0.223607	0
57	0	0	0	0	0	0	0	0	0	0	0	0	0	0			57	0.948683	0	0	0.5	0.223607	0.360555	0.1	ND	0	0	0.223607	0.921954	0	0.161803			57	0	0	0	0	0	0				57	0.223607	1.00499	0.2	0.1	0
58	0	0	0	0	0	0	0	0	0	0	0	0	0	0			58	0.608276	0	0	0	0.67082	0.1	0.2	ND	0	0	0.360555	0.538516	0	0.05			58	0	0	0	0	0	0				58	0	1	0.1	0.412311	0
59	0	0	0	0	0	0	0	0	0	0	0	0	0	0			59	0.316228	0	0	0	0.141421	0.2	0.1	ND	0	0	0.2	0.282843	0	0.05			59	0	0	0	0	0	0				59	0	0.4	0.1	0.316228	0
60	0	0	1	0	0	0	0	0	0	0	0	0	0	1			60	0.3	0	0	0	0	0.316228	0.316228	ND	0	0	0	0	0	0			60	0	0	0	0	0	0				60	0	0.7	0	0.1	0
61	0	0	1	0	0	0	0	0	0	0	0	0	0	1			61	0.1	0	0	0.360555	0	0.1	0.223607	ND	0.316228	0	0	0.1	0	0.05			61	0	0	0	0	0	0				61	0	0.905539	0.1	0.1	0
62	0	0	1	0	0	0	0	0	0	0	0	0	0	1			62	0.7	0	0	0.223607	0	0.1	0.282843	ND	0	0	0.2	0	0	0			62	0	0	0	0	0	0				62	0	0.360555	0.223607	0.141421	0
63	0	0	1	0	0	0	0	0	0	0	0	0	0	1			63	1.2	0.1	0.141421	0	0	0.583095	0.4	ND	0	0.5	0.223607	0.141421	0	0.141421			63	0	0	0	0	0	0				63	0	0.583095	0	0.141421	0
64	0	0	1	0	0	0	0	0	0	0	0	0	0	1			64	1.5	0.1	0.2	0	0	0.1	0.316228	ND	0	0.3	0.1	0	0	0.1			64	0	0	0	0	0	0				64	0	0.921954	0.141421	0	0.424264
65	0	0	1	0	0	0	0	0	0	0	0	0	0	1			65	0.948683	0.141421	0.2	0	0.3	0.3	0.223607	ND	0.3	0.1	0.447214	0.223607	0	0.223607			65	0	0	0	0	0	0				65	0	1.13137	0	0.316228	0.2
66	0	0	1	0	0	0	0	0	0	0	0	0	0	1			66	0.2	0.1	0	0	0.360555	0.1	0.141421	ND	0	0	0.223607	0	0	0.05			66	0	0	0	0	0	0				66	0	0.583095	0	0.1	0.223607
67	0	0	1	0	0	0	0	0	0	0	0	0	0	1			67	1.20416	0.223607	0	0.1	0.2	0.223607	0.412311	ND	1	0.282843	0	0	0	0.211803			67	0	0	0	0	0	0				67	0	0.360555	0.1	0.141421	0.1
68	0	0	0	0	0	0	0	0	0	0	0	0	0	0			68	2.5	0.1	0	0.223607	0	0.3	0.583095	ND	0.3	0.282843	0.223607	0.989949	0.141421	0.253225			68	0	0	0	0	0	0				68	0	0.223607	0.1	0.1	0
69	0	0	0	0	0	0	0	0	0	0	1	0	0	1			69	3.34215	0	1.08167	0.1	0	0.282843	0.781025	ND	0	0.3	0.223607	0.5	0	0.253225			69	0	0	0	0	0	0				69	0	0.806226	0.223607	0.1	0
70	1	0	0	0	0	0	0	0	0	0	1	0	0	2			70	1.64924	0.282843	0.2	0	0	0.223607	0.1	ND	0.608276	0.1	0.632456	0.640312	0	0.211803			70	0	0	0	0	0	0				70	0	0.1	0.141421	0	0
71	1	0	0	0	0	0	0	0	0	0	1	0	0	2			71	1.84391	0.1	0	0.1	0	0.1	0.1	ND	0.781025	0	0.894427	0	0	0.1			71	0	0	0	0	0	0				71	0	0.3	0.223607	0.316228	0
72	1	0	0	0	0	0	0	0	0	0	1	0	0	2			72	1.61555	0.1	0.282843	0.360555	0.3	0.223607	0.2	ND	0.223607	0.1	2.32594	0	0	0.223607			72	0	0	0	0	0	0				72	0	0.447214	0.141421	0.223607	0
73	1	0	0	0	0	0	0	0	0	0	1	0	0	2			73	1.40357	0.3	0.5	0	0	0.1	0.141421	ND	0	0.2	0	0.1	0	0.1			73	0	0	0	0	0	0				73	0	0	0.2	0.316228	0.141421
74	1	0	0	0	0	0	0	0	0	0	1	0	0	2			74	0.223607	0.223607	0.1	0.2	0.1	0.2	0.2	ND	0.2	0	0.989949	0	0	0.2			74	0	0	0	0	0	0				74	0	0.141421	0.1	0.2	0
75	1	0	0	0	0	0	0	0	0	0	1	0	0	2			75	1.41421	0	0	0.282843	0	0.316228	0.2	ND	0.1	0.412311	1.02956	0	0	0.15			75	0	0	0	0	0	0				75	0	0.1	0.141421	0.1	0
76	1	0	0	0	0	0	0	0	0	0	1	0	0	2			76	0.447214	0	0	0.1	0	0.1	0.223607	ND	0.282843	0.223607	0.509902	0	0	0.1			76	0	0	0	0	0	0				76	0	1.28062	0.141421	0.2	0
77	1	0	0	0	0	0	0	0	0	0	1	0	0	2			77	0.640312	0	0	0	0	0.1	0.1	ND	0	0.1	1.04403	0.1	0	0.05			77	0	0	0	0	0	0				77	0	0.4	0.1	0.1	0
78	1	0	1	0	0	0	0	0	0	0	1	0	0	3			78	0.761577	0	0	0	0	0.1	0.141421	ND	0	0.1	0.447214	0.223607	0	0.05			78	0	0	0	0	0	0				78	0	0.632456	0.316228	0.223607	0
79	1	0	1	0	0	0	0	0	0	0	1	0	0	3			79	0	0.2	0	0	0	0.1	0.1	ND	0	0	0.608276	0	0.141421	0			79	0	0	0	0	0	0				79	0	0.6	0.316228	0.223607	0.1
80	1	0	1	0	0	0	0	0	0	0	1	0	0	3			80	0	0.1	0	0	0	0.1	0.316228	ND	0	0	0	0	0.316228	0			80	0	0	0	0	0	0				80	0.141421	0.223607	0.141421	0.1	0
81	1	0	1	0	0	0	0	0	0	0	1	0	0	3			81	0	0.2	0	0	0	0.223607	0.316228	ND	0	0.2	0.1	0	1.62788	0.05			81	0	0	0	0	0	0				81	0	0	0.2	0	0
82	1	0	0	0	0	0	0	0	0	0	0	0	0	1			82	0.2	0	0.1	0	0	0.141421	0.3	ND	0	0.1	0.565685	0	0.282843	0.1			82	0	0	0	0	0	0				82	0.141421	0.2	0.141421	0.1	0
83	1	0	0	0	0	0	0	0	0	0	0	0	0	1			83	0.6	0	0	0.2	0	0.316228	0.3	ND	0.2	0.447214	0.360555	0	0	0.2			83	0	0	0	0	0	0				83	0	0.223607	0.1	0.1	0
84	1	0	0	0	0	0	0	0	0	0	0	0	0	1			84	0.1	0.2	0.1	0.2	0	0.1	0.707107	ND	0.5	1.1	0	0.2	0.360555	0.2			84	0	0	0	0	0	0				84	0	0.583095	0.3	0.1	0
85	1	0	0	0	0	0	0	0	0	0	0	0	0	1			85	0.509902	0.2	0	0.223607	0	0.1	0.223607	ND	0	0.6	0.223607	0.1	0.141421	0.170711			85	0	0	0	0	0	0				85	0	1.36015	0.1	0.141421	0.1
86	1	0	1	0	0	0	0	0	0	0	1	0	0	3			86	0	0	0.1	0	0	0.282843	0.538516	ND	0	0.608276	1.06301	0	0.223607	0.05			86	0	0	0	0	0	0				86	0.2	0.6	0.141421	0.316228	0
87	1	0	1	0	0	0	0	0	0	0	1	0	0	3			87	0.5	0.1	0	0.141421	0	0.223607	0.141421	ND	0	0	0.447214	0	0	0.05			87	0	0	0	0	0	0				87	0	0.223607	0.1	0.223607	0
88	1	0	1	0	0	0	0	0	0	0	1	0	0	3			88	0	0	0	0.4	0	0.608276	0.2	ND	0	0.1	1.89737	0.3	0.1	0.1			88	0	0	0	0	0	0				88	0	0.316228	0.223607	0	0
89	1	0	1	0	0	0	0	0	0	0	1	0	0	3			89	1.23693	0	0	0	0	0.538516	0.640312	ND	0	0	0.905539	0.1	0	0			89	0	0	0	0	0	0				89	0	0.223607	0.360555	0.1	0
90	1	0	1	0	0	0	0	0	0	0	1	0	0	3			90	0.806226	0	0	0.1	0	0.316228	0.761577	ND	0	0.6	2.19317	0	0.2	0.15			90	0	0	0	0	0	0				90	0	0.223607	0.412311	0.223607	0
91	0	0	1	0	0	0	0	0	0	0	1	0	0	2			91	1.28062	0	0	0	0	0.316228	0.67082	ND	0	0.1	0.608276	0.2	0	0.05			91	0	0	0	0	0	0				91	0.1	0	0.707107	0.141421	0
92	0	0	0	0	0	0	0	0	0	0	1	0	0	1			92	0	0.1	0	0.141421	0	0.316228	1.30384	ND	0.3	0.1	0.282843	0	0.1	0.1			92	0	0	0	0	0	0				92	0	0.2	0.948683	0.141421	0
93	0	0	0	0	0	0	0	0	0	0	1	0	0	1			93	0.806226	0	0	0.412311	0	0.608276	2.37697	ND	0.1	0.583095	0.608276	0	0.2	0.306155			93	0	0	0	0	0	0				93	0.2	0.360555	2.47588	0.141421	0
94	0	0	0	0	0	0	0	0	0	0	0	0	0	0			94	0.3	0	0	1.10454	0	0.360555	2.76586	ND	0.1	0	0.509902	0	0.282843	0.191421			94	0	0	0	0	0	0				94	0.1	0.223607	2.40416	0.282843	0
95	0	0	0	0	0	0	0	0	0	0	1	0	0	1			95	1.08167	0.2	0	0.3	0.2	0.509902	0.806226	ND	0	0	0.1	0	0.141421	0.170711			95	0	0	0	0	0	0				95	0.316228	0.360555	2.61725	0.141421	0
96	0	0	1	0	0	0	0	0	0	0	1	0	0	2			96	0	0	0	0.316228	0.8544	0.3	2.20227	ND	0.360555	0	0.223607	0	0.223607	0.223607			96	0	0	0	0	0	0				96	0.707107	0	1.16619	0.316228	0
97	0	0	0	0	0	0	0	0	0	0	1	0	0	1			97	0.707107	0	0	0	0	0.447214	1.00499	ND	0	0	0.2	0.223607	0.509902	0.1			97	0	0	0	0	0	0				97	0	0	2.10238	0.141421	0
98	0	0	0	0	0	0	0	0	0	0	1	0	0	1			98	0.538516	0	0	0.608276	0	0.141421	1.3	ND	0	0	0.6	0.905539	0.1	0.120711			98	0	0	0	0	0	0				98	0.223607	0.2	1.45602	0.2	0
99	0	0	0	0	0	0	0	0	0	0	1	0	0	1			99	1.84391	0.223607	0	0.5	0.538516	0.316228	0.4	ND	0	0	0	0.2	0.223607	0.223607			99	0	0	0	0	0	0				99	0	0.3	1.11803	0.223607	0
100	0	0	0	0	0	0	0	0	0	0	1	0	0	1			100	0.67082	0.1	0	1.40357	0.5	0.2	2.12132	ND	0	0.3	0.1	0.1	0.282843	0.241421			100	0	0	0	0	0	0				100	0.223607	0.3	0.806226	0.509902	0
101	0	0	0	0	0	0	0	0	0	0	1	0	0	1			101	0.141421	0	0.9	1.11803	0.2	0.360555	1.2	ND	0	1.06301	0	0	0	0.170711			101	0	0	0	0	0	0				101	0	0.538516	1.72047	0	0
102	1	0	1	0	0	0	0	0	0	0	1	0	0	3			102	0.5	0	0.905539	1.20416	0.1	0.1	0.806226	ND	0	0.223607	0	0.3	0.1	0.161803			102	0	0	0	0	1	1				102	0	0.1	1.80278	0	0.223607
103	1	0	1	0	0	0	0	0	0	0	1	0	0	3			103	1	0	0.141421	2.42074	0.1	0.223607	0.9	ND	0	0	1.11803	0.2	1.39284	0.211803			103	0	0	0	0	1	1				103	0	0.1	0.608276	0.2	0.3
104	1	0	1	0	0	0	0	0	0	0	0	0	0	2			104	1.56525	0.1	0	2.5	0	0.565685	3.48281	ND	0	0	0	0.223607	0.7	0.161803			104	0	0	0	0	1	1				104	0.2	0	1.31529	0.223607	0.223607
105	1	0	1	0	0	0	0	0	0	0	0	0	0	2			105	0.894427	0	0	2.18403	0.1	0.447214	2.23607	ND	0	0.5	0.1	0.1	0	0.1			105	0	0	0	0	1	1				105	1.7088	0.1	4.04599	0.447214	0.141421
106	1	0	1	1	0	0	0	0	0	0	0	0	0	3			106	0.728011	0	0.1	1.74642	0	0.447214	0.5	ND	0	0.1	0.1	0	1.51327	0.1			106	0	0	0	0	1	1				106	0.223607	0.2	2.08087	0.1	0
107	0	0	1	1	0	0	0	0	0	0	0	0	0	2			107	0.4	0.1	0.583095	1.07703	0.1	0.282843	0.141421	ND	0	0.5	0.8	0	0.538516	0.341421			107	0	0	0	0	1	1				107	0.360555	0	1.11803	0.3	0
108	0	0	0	1	0	0	0	0	0	0	0	0	0	1			108	0.4	0	0	0.632456	0	0.316228	0.905539	ND	0	1.07703	0.2	0.905539	0.223607	0.269917			108	0	0	0	0	1	1				108	0	0.1	0.2	0	0
109	0	0	0	0	0	0	0	0	0	0	1	0	0	1			109	1.96469	0	0	0.509902	0	0.316228	0.412311	ND	0	0	0	0.1	0	0			109	0	0	0	0	1	1				109	0.5	0	0.509902	0	0
110	0	0	0	0	0	0	0	0	0	0	1	0	0	1			110	2.45153	0	0.1	0.360555	0	0.1	0.223607	ND	0	0.424264	0.141421	0.2	0	0.120711			110	0	0	0	0	1	1				110	0.1	0	0.583095	0.412311	0
111	0	0	1	0	0	0	0	0	0	0	1	0	0	2			111	0.412311	0	0.316228	0.632456	0	0.282843	0.316228	ND	0	0.360555	0.538516	0	0	0.299535			111	0	0	0	0	1	1				111	0.141421	0	0.583095	0.360555	0
112	0	0	1	0	0	0	0	0	0	0	1	0	0	2			112	0.316228	0	0	0.3	0	0	1.52315	ND	0	0.360555	0	0	0	0			112	0	0	0	0	1	1				112	0.1	0	1.21655	0.141421	0
113	0	0	1	0	0	0	0	0	0	0	1	0	0	2			113	0.141421	0	0	0.4	0	0.1	2.22036	ND	0	0.1	0	0	0.1	0.05			113	0	0	0	0	1	1				113	0.5	0	0.509902	0.2	0
114	0	0	1	0	0	0	0	0	0	0	1	0	0	2			114	0.943398	0	0	0.316228	0	0.1	2.00998	0	0	0	0	0	0.316228	0			114	0	0	0	0	1	1				114	0.67082	0	2.78568	0.360555	0
115	0	0	1	0	0	0	0	0	0	0	1	0	0	2			115	1.3	0	0	0.4	0	0.2	0.707107	0	0	0	0	0	0	0			115	0	0	0	0	1	1				115	0.9	0	1.84391	0	0
116	1	0	1	0	0	0	0	0	0	0	1	0	0	3			116	0.9	0	0	0.223607	0.316228	0.1	0.509902	0.2	0	0.2	0.1	0	0	0.1			116	0	0	0	0	1	1				116	1.20416	0	0.8	0.2	0
117	0	0	1	0	0	0	0	0	0	0	1	0	0	2			117	0.921954	0	0	0.223607	0.5	0.282843	4.75079	0	0	0.360555	0	0	0	0			117	0	0	0	0	1	1				117	0.728011	0	1.61555	0.3	0
118	0	0	1	0	0	0	0	0	0	0	1	0	0	2			118	0.316228	0	0	2.77308	0	0	0.781025	0	0	0.223607	0.2	0	0.4	0			118	0	0	0	0	1	1				118	3.82884	0	1.76918	0.1	0
119	0	0	1	0	0	0	0	0	0	0	1	0	1	3			119	3.68782	0	0	2.0025	0	0.1	1.14018	0.5	0	0	0	0	0	0			119	0	0	0	0	1	1				119	0.781025	0	0.894427	0.2	0
120	0	0	1	0	0	0	0	0	1	0	1	0	1	4			120	5.37587	0	0	0.905539	0	0.3	0.632456	1.07703	0	0	0	0	0	0			120	0	0	0	0	1	1				120	0.948683	0	2.72029	0.223607	0
121	0	0	1	0	0	0	0	0	0	0	1	0	0	2			121	0.2	0	0.1	1.0198	0	0.4	0.424264	0	0	0	0.2	0	0	0			121	0	0	0	0	1	1				121	0.360555	0	1.70294	0	0
122	1	0	1	0	0	0	0	0	0	0	1	0	1	4			122	0.72111	0	0	1.00499	0	0.141421	0.7	0	0	0.3	0.1	0	0	0			122	0	0	0	0	1	1				122	1.14018	0	4.42832	0.1	0.1
123	0	0	1	0	0	0	0	0	0	0	1	0	1	3			123	1.62788	0	0	1.0198	1.04403	0.282843	0.6	0.223607	0	0	0	0.608276	0	0.223607			123	0	0	0	0	1	1				123	1.0198	0	3.10161	0.1	0.1
124	0	0	1	0	0	0	0	0	0	1	1	0	1	4			124	1.56205	0	0	0.565685	0.316228	0.1	0.360555	0.632456	0	0	0.360555	0	0	0.1			124	0	0	0	0	1	1				124	2.28035	0	0.4	0.141421	0
125	0	0	1	0	0	0	0	0	0	1	1	0	1	4			125	1.14018	0.1	0	0	0.1	0.141421	0.583095	0.360555	0	0.3	0.141421	0.5	0.424264	0.141421			125	0	1	0	0	1	2				125	3.54683	0	0	0.2	0
126	1	0	1	0	0	0	0	0	0	1	1	1	1	6			126	1.28062	0.1	0	0.707107	0	0.412311	0.7	0.3	0.282843	0	0.1	0.1	0	0.1			126	0	1	0	0	1	2				126	1.45602	0	1.66433	0.282843	0.608276
127	1	0	1	0	0	0	0	0	0	1	1	1	1	6			127	0.761577	0	0	0.806226	0	0.141421	0.223607	0	0	0.8	0.1	0.223607	0.1	0.1			127	0	1	0	0	1	2				127	0.583095	0	0.608276	0.3	0
128	1	0	1	0	0	0	0	0	0	1	1	1	1	6			128	0.989949	0	0.1	2.54951	0	0.3	1.30384	0.824621	0	0.538516	0.360555	0.316228	0	0.316228			128	0	1	0	0	1	2				128	0.72111	0.707107	0.583095	0.640312	0.1
129	1	0	1	0	0	0	0	0	0	1	1	1	1	6			129	1.20416	0.1	0	1.28062	0.5	0.6	1.253	0.223607	0	0.1	0.316228	0	0	0.223607			129	0	1	0	0	1	2				129	1.14018	0.141421	1	0.412311	0.282843
130	1	0	1	0	0	1	0	0	0	1	1	1	1	7			130	0.67082	0.223607	0	1.71172	0	0.1	2.1587	0.921954	0	0.223607	0	0.141421	0	0.141421			130	0	1	0	0	1	2				130	0.608276	0.223607	1.87883	1.2	0.223607
131	1	0	1	0	0	1	0	0	0	1	1	1	1	7			131	0.360555	0	0	0.9	0.67082	0.223607	1.90263	0.3	0.632456	0.1	0	0.141421	0.1	0.223607			131	1	1	0	0	1	3				131	1.23693	0.223607	1.04403	0.921954	0.223607
132	1	0	1	0	0	1	0	0	0	1	1	1	1	7			132	0.360555	0.3	0.2	0	0	0.282843	0.728011	0	0.6	0.608276	0	0	0.1	0.2			132	1	1	0	0	1	3				132	1.71172	0	0.412311	1.8	0
133	0	0	1	1	0	1	0	0	0	1	1	1	1	7			133	0.316228	0.141421	0.447214	0.4	0.8544	0.447214	0.412311	0.1	0	0	0.1	0.316228	0.141421	0.316228			133	1	1	0	0	1	3				133	0.1	0.223607	0	1.3	0
134	0	1	1	1	1	1	0	1	0	1	1	1	1	10			134	0.316228	0	0	0.943398	0.1	0.860233	0.360555	0.412311	0	0.141421	0	0	0.640312	0.141421			134	1	1	0	1	1	4				134	0	0.141421	0	0.989949	0.282843
135	0	1	1	1	1	1	1	1	1	1	1	1	1	12			135	0.1	0.1	0	2.14709	1.84391	0.424264	0.848528	1.11803	1.64924	0	0	0.412311	0.282843	0.412311			135	1	1	0	1	1	4				135	0.1	0	0.412311	0.894427	0
136	1	1	1	1	1	1	1	1	1	1	1	1	1	13			136	0.509902	0.1	0	2.02237	1.11803	0.583095	0.707107	0	2.1095	0.223607	0.141421	0	0.360555	0.360555			136	1	1	0	1	0	3				136	0.538516	0.424264	0	0.905539	0.1
137	1	0	0	1	0	1	1	1	1	1	1	1	1	10			137	0.6	0.316228	0	2.59422	1.5	0.223607	0.806226	0	3.18277	0.2	0.316228	0.360555	0.282843	0.316228			137	1	1	0	1	1	4				137	1.20416	0	0.412311	1.34536	0
138	1	0	1	1	0	1	1	1	1	1	1	1	1	11			138	0.72111	0.316228	0	1.47648	0.565685	0.72111	1.253	0.282843	2.24722	0	0.583095	0.1	0.538516	0.565685			138	1	1	0	1	1	4				138	0.707107	0.141421	0.8544	2.19545	0
139	1	0	1	1	0	1	1	1	1	1	1	1	1	11			139	0.1	0.141421	0	0.5	1.74642	0.447214	0.424264	0	2.84429	0	0	0.223607	0.3	0.223607			139	1	1	0	0	1	3				139	0.5	0.316228	1.65529	0.848528	0
140	1	0	1	1	0	0	1	1	1	1	1	0	1	9			140	0	0	0	0.860233	0.1	0.424264	0.3	0	3.05941	0	0	0	0.7	0			140	1	1	0	0	1	3				140	0.583095	0.538516	1.00499	0	0
141	1	1	0	1	0	1	1	1	1	1	0	1	1	10			141	0	0.282843	0	0.5	0	0.761577	0.806226	0	0.447214	0.316228	0	0	0.707107	0.282843			141	1	1	0	0	1	3				141	0.360555	0	0.894427	0	0
142	1	0	0	1	0	1	1	1	1	1	1	1	1	10			142	0.282843	0.2	0.223607	0.640312	0	0.989949	0.8	1.253	1.78885	0	0.1	0	0.316228	0.282843			142	1	1	0	0	1	3				142	0.223607	0	0.806226	0	0
143	1	0	0	1	0	1	1	1	1	1	1	1	1	10			143	0.447214	0.1	0	0.9	0	0.447214	0.761577	0	0.447214	0	0.1	0	1.90263	0.1			143	1	1	0	0	1	3				143	0.2	0.316228	0.72111	1.30384	0
144	0	0	0	0	0	0	0	1	1	1	0	1	1	5			144	0.360555	0.1	0	0.223607	0.360555	0.921954	0.316228	0.6	2.20227	0	0	0	1.56525	0.316228			144	1	0	0	0	1	2				144	0.2	0	0.943398	0.5	0
145	0	0	0	0	0	0	1	1	0	1	1	1	0	5			145	0.640312	0	0.1	0.360555	0.282843	0.707107	0.1	1.44222	2.20227	0.360555	0	0	0.583095	0.360555			145	1	0	0	0	1	2				145	0.223607	0	0.8544	0.6	0.424264
146	1	0	1	0	0	0	1	0	1	0	1	1	0	6			146	0	0	0	0.223607	0.223607	0.5	0.806226	1.2083	1.30384	0.3	0.2	0	0.282843	0.223607			146	1	0	0	0	0	1				146	0.2	1.11803	0.640312	0.316228	0
147	1	0	1	0	0	0	0	0	0	0	1	1	0	4			147	0.921954	0.5	0.1	0.1	0.72111	0.6	0.360555	0.447214	0.5	0.6	0.72111	0.223607	0	0.5			147	1	0	0	0	0	1				147	0.509902	0.223607	0.3	0	0
148	1	0	1	0	0	0	0	0	1	0	1	1	0	5			148	1.28062	0.316228	0	0.583095	0.2	1.10454	0.4	0.3	1.44222	0	0	0	0	0.3			148	1	0	1	0	0	2				148	0.223607	0.223607	0.412311	0	0.223607
149	1	0	1	0	0	0	0	0	0	0	1	1	0	4			149	0.72111	0.1	0	0.360555	0.2	0.9	0.223607	0.1	0.1	0	0.5	0	0	0.1			149	1	0	1	0	0	2				149	0.282843	1.26491	0.282843	0.1	0
150	1	0	1	0	0	0	0	0	0	0	1	0	0	3			150	0	0	0	0.2	0.5	0.2	0.316228	0.3	0.424264	0	0.1	0	0	0.1			150	1	0	1	0	0	2				150	0.1	0.632456	0.1	0	0
151	1	0	1	0	0	0	0	0	0	0	1	0	0	3			151	0	0	0.3	0	0	0.2	0	0	0.1	0	0.3	0	0	0			151	0	0	0	0	0	0				151	0.316228	0.8544	0.565685	0	0.4
152	1	0	1	0	0	0	0	0	0	0	1	0	0	3			152	0	0	0	0.1	0.316228	0.4	0.223607	0	0.565685	0	0.223607	0	0.509902	0.1			152	0	0	0	0	0	0				152	0.360555	0.2	0.3	0	0
153	1	0	1	0	0	0	0	0	0	0	1	0	0	3			153	0	0	0.1	0.5	0.282843	0.141421	0.4	0.583095	0.223607	0.412311	0.412311	0	0.1	0.223607			153	0	0	0	0	0	0				153	0.223607	0.316228	0	0	0
154	1	0	1	0	0	0	0	0	0	0	0	0	0	2			154	0	0	0.223607	0.2	0	1.43178	0.412311	0.1	0.3	0.5	0	0	0.141421	0.141421			154	0	0	0	0	0	0				154	0	1.5	0	0.4	0.2
155	0	0	1	0	0	0	0	0	0	0	0	0	0	1			155	0	0	0	0.316228	0	0.9	0.282843	0	0.67082	0	0	0	0	0			155	0	0	0	0	0	0				155	0.223607	0	0.3	0	0
156	1	0	1	0	0	0	0	0	0	0	1	0	0	3			156	0	0	0	0	0	0.2	0.2	0	0.412311	0	0	0	0	0			156	0	0	0	0	0	0				156	0	0.3	0.2	0.223607	0
157	1	0	1	0	0	0	0	0	0	0	1	0	0	3			157	0	0.282843	0	0.509902	0.1	0.424264	0.2	0.316228	0.141421	0	0.6	0	0.1	0.141421			157	0	0	0	0	0	0				157	0	1.11803	0.3	0.141421	0
158	1	0	1	0	0	0	0	0	0	0	1	0	1	4			158	0	0.223607	0	0	0	0.447214	0.5	0	0.3	0	0.282843	0	0	0			158	0	0	1	0	0	1				158	0	0.424264	0.3	0.3	0
159	1	0	1	0	0	0	0	0	0	0	1	0	1	4			159	0	0	0.2	0	0.1	0.2	0.6	0	0	0.1	0.223607	0	0	0			159	0	0	1	0	0	1				159	0	0	0.5	0.3	0.141421
160	1	0	1	0	0	0	0	0	0	0	1	1	1	5			160	0	0	0	0.3	0	0.223607	0.360555	0.5	0.1	0	0.5	0	0.316228	0.1			160	1	0	1	0	0	2				160	0.2	0	0.5	0.141421	0.1
161	1	0	1	0	0	0	0	0	0	0	0	0	0	2			161	0.9	0.223607	0	0.360555	0.223607	0.2	0.360555	0.948683	0.223607	0	0.316228	0	0.3	0.223607			161	1	0	1	0	0	2				161	0.4	0	0	0	0
162	1	0	0	0	0	0	0	0	0	0	0	0	0	1			162	0.223607	0.282843	0	0.509902	0.1	0.1	0.316228	0.7	0.3	0	0	0	0.509902	0.223607			162	1	0	1	0	0	2				162	0.2	0	0.565685	0.2	0
163	1	0	0	0	0	0	0	0	0	0	0	0	0	1			163	0.223607	0.141421	0.2	0.5	0	0.1	0.2	0.707107	0.360555	0	0	0	0.5	0.2			163	1	0	1	0	0	2				163	0.538516	0	0	0.2	0
164	1	0	0	0	0	0	0	0	0	0	0	0	0	1			164	0.538516	0.707107	0.4	0.509902	0	0	0.316228	0.3	0.640312	0	0	0	0	0.3			164	1	0	0	0	0	1				164	0	0	0	0.223607	0.141421
165	1	0	0	0	0	0	0	0	0	0	0	0	0	1			165	0	0.223607	0.2	0.223607	0.316228	0	0.1	0.1	0.1	0.1	0	0	0	0.1			165	1	0	1	0	0	2				165	0.3	0	0.424264	0.316228	0
166	1	0	0	0	0	0	0	0	0	0	0	0	0	1			166	0	0.424264	0.984886	0.141421	0	0.2	0.412311	1.11803	0.1	0	0	0	0	0.1			166	0	0	0	0	0	0				166	0.1	0	0.2	0	0
167	1	0	0	0	0	0	0	0	0	0	0	0	0	1			167	0	0.447214	0.412311	0	0	0.3	0.2	0	0.412311	0.360555	0	0	0	0			167	0	0	0	0	0	0				167	0.2	0.3	0	0	0
168	1	0	0	0	0	0	0	0	0	0	0	0	0	1			168	0	0	4.19762	0	0.2	0.3	0.5	0.141421	0.360555	0	0	0	0	0			168	0	0	0	0	0	0				168	0.2	0.6	0	0.4	0
169	1	0	0	0	0	0	0	0	0	0	0	0	0	1			169	0	0	0.3	0.1	0	0.316228	0.316228	0	0.360555	0.360555	0	0	0	0			169	0	0	0	0	0	0				169	0.282843	0	0.5	0.141421	0
170	1	0	0	0	0	0	0	0	0	0	0	0	0	1			170	0	0.4	1.74642	0.4	0	0.316228	0.2	0	0.316228	0.282843	0	0	0	0.2			170	0	0	0	0	0	0				170	0.223607	0.2	0.282843	0.1	0
171	1	0	0	0	0	0	0	0	0	0	0	0	0	1			171	0.412311	0.1	2.12603	0.1	0.223607	0.806226	0.1	0.447214	0.1	0.360555	0.412311	0	0	0.223607			171	0	0	0	0	0	0				171	0.2	0.2	0.4	0.3	0.2
172	1	0	0	0	0	0	0	0	0	0	0	0	0	1			172	0	0.1	0.608276	0.412311	0	0.3	0.316228	0.5	0.360555	0.316228	0	0	0	0.3			172	0	0	0	0	0	0				172	0.1	0.412311	0	0.316228	0.141421
173	0	0	0	0	0	0	0	0	0	0	0	0	0	0			173	0.6	1.8868	0.1	0.2	0.2	0.2	0.3	0.8	0.2	0.67082	0.538516	0	0	0.2			173	0	0	0	0	0	0				173	0.1	0.728011	0.608276	0.360555	0
174	0	0	0	0	0	0	0	0	0	0	0	0	0	0			174	0.5	0.640312	1.39284	0	0	0.1	0.1	0.3	0.3	0	0.447214	0	0	0.1			174	0	0	0	0	0	0				174	0.3	0	0	0.2	0
175	0	0	0	0	0	0	0	0	0	0	0	0	0	0			175	0	1.16619	3.40147	0.1	0	0.141421	0.4	0.3	0.282843	0	0	0	0	0.1			175	0	0	0	0	0	0				175	0.632456	0	0.1	0.1	0
176	0	0	0	0	0	0	0	0	0	0	0	0	0	0			176	0	0.509902	1.96469	0.1	0.223607	0.223607	0.360555	0	0.2	0.412311	0.316228	0	0	0.223607			176	0	0	0	0	0	0				176	0.860233	0.1	0	0.1	0
177	0	0	0	0	0	0	0	0	0	0	0	0	0	0			177	0	0.282843	1.36015	0	0.1	0.509902	0.223607	0.424264	0.141421	0.3	0.141421	2.64764	0	0.223607			177	0	0	0	0	0	0				177	0	0.2	0.3	0	0.905539
178	0	0	0	0	0	0	0	0	0	0	0	0	1	1			178	0	0.640312	2.18403	0	0.424264	0.583095	0.1	0	0.141421	0	0.1	1.28062	0	0.1			178	0	0	0	0	0	0				178	0.848528	0	0	0	0.223607
179	0	0	0	0	0	0	0	0	0	0	0	0	0	0			179	0	0.141421	1.55563	0.1	0	0.3	0.447214	0.509902	0.2	0	0	1.20416	0.3	0.2			179	0	0	0	0	0	0				179	0.412311	0.1	0	0.2	0.3
180	0	0	0	0	0	0	0	0	0	0	0	0	0	0			180	0	0.286	1.61555	0.905539	0.447214	0.141421	0.72111	0.3	0.360555	0.1	0.1	3.10644	0.141421	0.3			180	0	0	0	0	0	0				180	1.22066	0	0	0.2	0.608276
[truncated: 46 more columns]

[truncated: 26 more sheets: Sheet 10, Sheet 11, Sheet 12, Sheet 13, Sheet 14, Sheet 15, Sheet 16, Sheet 17, Sheet 18, Sheet 19, Sheet 20 , Sheet 21, Sheet 22, Sheet 23 , Sheet 24, Sheet 25, Sheet 26, Sheet 27, Sheet 28, Sheet 29 …]
